# Supplementary material for: A general and green fluoroalkylation reaction promoted via noncovalent interactions between acetone and fluoroalkyl iodides
Source: Royal Society of Chemistry journal article supplement (doi:10.1039/c9cc09517a), 2020-01-01

Supporting Information for

# **A General and Green Fluoroalkylation Reaction Promoted *via* Noncovalent Interactions between Acetone and Fluoroalkyl Iodides**

**Ting Mao,<sup>†</sup> Ming-Jian Ma,<sup>†</sup> Liang Zhao, De-Pu Xue, Yanbo Yu, Jiwei Gu, and  
Chun-Yang He\***

Key Laboratory of Biocatalysis & Chiral Drug Synthesis of Guizhou Province, Generic Drug Research  
Center of Guizhou Province. School of Pharmacy. Zunyi Medical University.

hechy2002@163.com

## List of Contents

|                                            |     |
|--------------------------------------------|-----|
| 1) General information                     | S02 |
| 2) General procedure                       | S02 |
| 3) Data for compounds <b>3, 5, 7</b>       | S04 |
| 4) References                              | S20 |
| 5) Mechanism studies                       | S21 |
| 6) Copies of NMR spectra of <b>3, 5, 7</b> | S27 |

## 1. General informations

$^1\text{H}$  NMR spectra and  $^{13}\text{C}$  NMR spectra were recorded on an Agilent AM400 spectrometer.  $^{19}\text{F}$  NMR was recorded on an Agilent 400MHz NMR spectrometer ( $\text{CFCl}_3$  as outside standard and low field is positive). Chemical shifts ( $\delta$ ) are reported in ppm, and coupling constants ( $J$ ) are in Hertz (Hz). The following abbreviations were used to explain the multiplicities: s = singlet, d = doublet, t = triplet, q = quartet, m = multiplet, br = broad. NMR yield was determined by  $^{19}\text{F}$  NMR using fluorobenzene as an internal standard before working up the reaction.

**Materials:** All reagents were used as received from commercial sources, unless specified otherwise, or prepared as described in the literature. All reagents were weighed and handled in air at room temperature. LEDs (430-490 nm) were bought online (Peak Wavelength: 455.0 nm). LEDs with short wavelength (425-430 nm, 450-455 nm, 470-475 nm, 490-495 nm, 510-515 nm, 545-550 nm) were purchased from WATTCAS<sup>TM</sup>, and relevant experiments were performed in a WP-TEC-1020SL parallel reactor from WATTCAS<sup>TM</sup>.

## 2. General procedure

**2.1 General procedure for the optimization of the visible-light-promoted difluoroalkylation of allylcarbamate 1a.** To a 25 mL of Schlenk tube equipped with a Teflon septum were added Base (1.0-2.0 equiv.) under Ar, followed by solvent (2.0 mL) with stirring. Allylcarbamate **1a** (0.30 mmol, 1.0 equiv.) and  $\text{ICF}_2\text{COOEt}$  (**2a**) (0.45 mmol, 1.5 equiv) were added subsequently. The tube was then irradiated with 12 W blue LEDs (430 nm-490 nm). After stirring for 16 h, the solvent was removed and the residue was purified with silica gel chromatography to provide pure product.

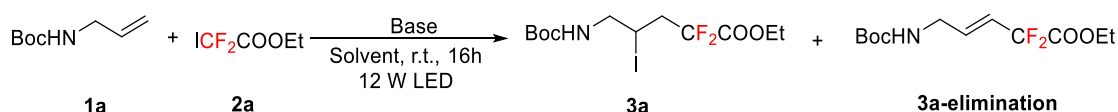

| Entry | Light Source     | Base (equiv)                        | Solvent | 3a, Yield (%) | 3a-elimination, Yield (%) |
|-------|------------------|-------------------------------------|---------|---------------|---------------------------|
| 1     | Blue (430-490)   | K <sub>2</sub> CO <sub>3</sub> (1)  | acetone | 74            | ----                      |
| 2     | Blue (430-490)   | KOAc (1)                            | acetone | 64            | 5                         |
| 3     | Blue (430-490)   | K <sub>2</sub> CO <sub>3</sub> (2)  | acetone | 99 (93)       | ----                      |
| 4     | Blue (430-490)   | Na <sub>2</sub> CO <sub>3</sub> (2) | acetone | 81            | ----                      |
| 5     | -----            | K <sub>2</sub> CO <sub>3</sub> (2)  | acetone | ----          | ----                      |
| 6     | Blue (430-490)   | ----                                | acetone | 49            | ----                      |
| 7     | Purple (425-430) | K <sub>2</sub> CO <sub>3</sub> (2)  | acetone | 93            | ----                      |
| 8     | Blue (450-455)   | K <sub>2</sub> CO <sub>3</sub> (2)  | acetone | 93            | ----                      |
| 9     | Blue (470-475)   | K <sub>2</sub> CO <sub>3</sub> (2)  | acetone | 91            | ----                      |
| 10    | Blue (490-495)   | K <sub>2</sub> CO <sub>3</sub> (2)  | acetone | 72            | ----                      |
| 11    | Green (510-515)  | K <sub>2</sub> CO <sub>3</sub> (2)  | acetone | 67            | ----                      |
| 12    | Green (545-550)  | K <sub>2</sub> CO <sub>3</sub> (2)  | acetone | 52            | ----                      |
| 13    | Blue (430-490)   | K <sub>2</sub> CO <sub>3</sub> (2)  | S-1     | 82            | ----                      |
| 14    | Blue (430-490)   | K <sub>2</sub> CO <sub>3</sub> (2)  | S-2     | ----          | ----                      |
| 15    | Blue (430-490)   | K <sub>2</sub> CO <sub>3</sub> (2)  | S-3     | ----          | ----                      |
| 16    | Blue (430-490)   | K <sub>2</sub> CO <sub>3</sub> (2)  | Dioxane | ----          | ----                      |
| 17    | Blue (430-490)   | K <sub>2</sub> CO <sub>3</sub> (2)  | MeCN    | 68            | ----                      |
| 18    | Blue (430-490)   | K <sub>2</sub> CO <sub>3</sub> (2)  | DMA     | 26            | 43                        |
| 19    | Blue (430-490)   | K <sub>2</sub> CO <sub>3</sub> (2)  | DMSO    | 5             | 30                        |
| 20    | Blue (430-490)   | K <sub>2</sub> CO <sub>3</sub> (2)  | Toluane | ----          | ----                      |

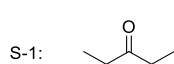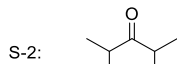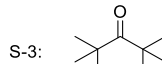

<sup>a</sup> Reaction conditions (unless otherwise specified): **1a** (0.3 mmol, 1.0 equiv), **2a** (0.45 mmol, 1.5 equiv), acetone (2.0 mL), room temperature, 16 h. <sup>b</sup> NMR yield determined by <sup>19</sup>F NMR using fluorobenzene as internal standard and number in parentheses is yield of isolated product.

**2.2 General procedure for the direct fluoroalkylation of alkenes and alkynes.** To a 25 mL of Schlenk tube equipped with a Teflon septum were added K<sub>2</sub>CO<sub>3</sub> (0.60 mmol, 2.0 equiv) under Ar, followed by acetone (2.0 mL) with stirring. Alkene (**1**)/ alkyne (**4**) (0.30 mmol, 1.0 equiv) and IR<sub>f</sub> (**2**) (0.45 mmol, 1.5 equiv) were added subsequently.

The tube was then irradiated with 12 W blue LEDs (430 nm-490 nm). After stirring for 16 h, the solvent was removed and the residue was purified with silica gel chromatography to provide pure product.

### 2.3 General procedure for the direct fluoroalkylation of arenes and heteroarenes.

To a 25 mL of Schlenk tube equipped with a Teflon septum were added Na<sub>2</sub>CO<sub>3</sub> (0.60 mmol, 2.0 equiv) under Ar, followed by Acetone (1.0 mL) + DMF (1.0 mL) with stirring. (Hetero)arene **6** (0.30 mmol, 1.0 equiv) and IR<sub>f</sub> (**2**) (0.90 mmol, 3.0 equiv) were added subsequently. The tube was then irradiated with 12 W blue LEDs (430 nm-490 nm). After stirring for 24 h, the residue was diluted with ethyl acetate, washed with H<sub>2</sub>O and brine, dried over Na<sub>2</sub>SO<sub>4</sub>, filtered and concentrated. The residue was purified with silica gel chromatography to provide pure product.

### 3. Data for compounds **3**, **5**, **7**

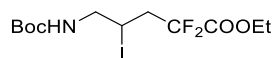

**Ethyl 5-((tert-butoxycarbonyl)amino)-2,2-difluoro-4-iodopentanoate (3a).** The product (114 mg, 93% yield) was purified with silica gel chromatography (Petroleum ether/Ethyl acetate = 5:1) as pale yellow liquid. <sup>1</sup>H NMR (400 MHz, CDCl<sub>3</sub>) δ 5.01 (br, 1H), 4.33 (q, *J* = 7.2 Hz, 2H), 4.31-4.23 (m, 1H), 3.58-3.35 (m, 2H), 2.85-2.70 (m, 2H), 1.43 (s, 9H), 1.35 (t, *J* = 7.2 Hz, 3H). <sup>19</sup>F NMR (376 MHz, CDCl<sub>3</sub>) δ -109.7 (dt, *J* = 264.3 Hz, 15.0 Hz, 1F), -113.4 (dt, *J* = 264.3 Hz, 16.5 Hz, 1F). <sup>13</sup>C NMR (101 MHz, CDCl<sub>3</sub>) δ 163.2 (t, *J* = 33.0 Hz), 155.5, 114.8 (t, *J* = 253.8 Hz), 79.9, 63.3, 48.8, 42.0 (t, *J* = 23.8 Hz), 28.2, 21.1, 13.8. HRMS (ESI, *m/z*): (M+H)<sup>+</sup> Calculated for C<sub>12</sub>H<sub>21</sub>NF<sub>2</sub>O<sub>4</sub>I: 408.0478; Found: 408.0477.

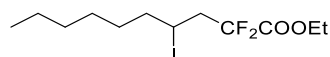

**Ethyl 2,2-difluoro-4-iododecanoate (3b).** This compound is known.<sup>1</sup> The product (85 mg, 78% yield) was purified with silica gel chromatography (Petroleum ether 100%) as pale yellow liquid. <sup>1</sup>H NMR (400 MHz, CDCl<sub>3</sub>) δ 4.34 (q, *J* = 7.2 Hz, 2H), 4.25-4.19

(m, 1H), 2.98-2.67 (m, 2H), 1.86-1.68 (m, 2H), 1.57-1.46 (m, 1H), 1.37 (t,  $J = 7.2$  Hz, 3H), 1.40-1.22 (m, 7H), 0.89 (t,  $J = 6.6$  Hz, 3H).  $^{19}\text{F}$  NMR (376 MHz,  $\text{CDCl}_3$ )  $\delta$  -109.4 (ddd,  $J = 262.8$  Hz, 18.4 Hz, 12.8 Hz, 1F), -114.0 (dt,  $J = 262.8$  Hz, 17.3 Hz, 1F).  $^{13}\text{C}$  NMR (101 MHz,  $\text{CDCl}_3$ )  $\delta$  163.5 (t,  $J = 32.3$  Hz), 115.2 (t,  $J = 253.9$  Hz), 63.2, 45.3 (t,  $J = 23.2$  Hz), 40.4, 31.6, 29.4, 28.2, 23.3 (t,  $J = 4.0$  Hz), 22.5, 14.0, 13.9.

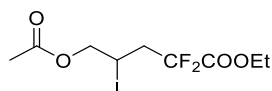

**Ethyl 5-acetoxy-2,2-difluoro-4-iodopentanoate (3c).** The product (89 mg, 85% yield) was purified with silica gel chromatography (Petroleum ether/Ethyl acetate = 20:1) as pale yellow liquid.  $^1\text{H}$  NMR (400 MHz,  $\text{CDCl}_3$ )  $\delta$  4.39-4.28 (m, 4H), 4.27-4.20 (m, 1H), 2.92-2.72 (m, 2H), 2.11 (s, 3H), 1.37 (t,  $J = 7.0$  Hz, 3H).  $^{19}\text{F}$  NMR (376 MHz,  $\text{CDCl}_3$ )  $\delta$  -110.3 (ddd,  $J = 265.5$  Hz, 18.0 Hz, 13.2 Hz, 1F), -113.3 (dt,  $J = 265.8$  Hz, 16.9 Hz, 1F).  $^{13}\text{C}$  NMR (101 MHz,  $\text{CDCl}_3$ )  $\delta$  170.1, 163.1 (t,  $J = 32.3$  Hz), 114.8 (t,  $J = 254.0$  Hz), 68.6, 63.4, 41.7 (t,  $J = 23.9$  Hz), 20.7, 14.5 (t,  $J = 4.1$  Hz) 13.9. MS (ESI,  $m/z$ ): 368 ( $\text{M}+\text{NH}_4$ ) $^+$ . HRMS (ESI,  $m/z$ ): ( $\text{M}+\text{NH}_4$ ) $^+$  Calculated for  $\text{C}_9\text{H}_{17}\text{NF}_2\text{O}_4\text{I}$ : 368.0165; Found: 368.0163.

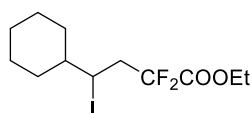

**Ethyl 4-cyclohexyl-2,2-difluoro-4-iodobutanoate (3d).** The product (104 mg, 96% yield) was purified with silica gel chromatography (Petroleum ether/Ethyl acetate = 200:1) as pale yellow liquid.  $^1\text{H}$  NMR (400 MHz,  $\text{CDCl}_3$ )  $\delta$  4.34 (q,  $J = 7.2$  Hz, 2H), 4.28-4.19 (m, 1H), 2.93-2.70 (m, 2H), 1.84-1.60 (m, 5H), 1.37 (t,  $J = 7.0$  Hz, 3H), 1.42-1.04 (m, 5H), 0.90-0.80 (m, 1H).  $^{19}\text{F}$  NMR (376 MHz,  $\text{CDCl}_3$ )  $\delta$  -102.3 (ddd,  $J = 261.7$  Hz, 17.3 Hz, 13.5 Hz, 1F), -107.3 (dt,  $J = 261.3$  Hz, 17.3 Hz, 1F).  $^{13}\text{C}$  NMR (101 MHz,  $\text{CDCl}_3$ )  $\delta$  163.5 (t,  $J = 32.4$  Hz), 115.3 (t,  $J = 253.5$  Hz), 63.2, 44.5, 42.9 (t,  $J = 23.4$  Hz), 33.3, 32.9 (dd,  $J = 4.2$  Hz, 3.1 Hz), 29.9, 26.0, 25.7, 25.6, 13.9. HRMS (ESI,  $m/z$ ): ( $\text{M}+\text{Na}$ ) $^+$  Calculated for  $\text{C}_{12}\text{H}_{19}\text{F}_2\text{INaO}_2$ : 383.0290; Found: 383.0294.

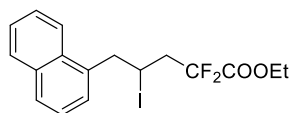

**Ethyl 2,2-difluoro-4-iodo-5-(naphthalen-1-yl)pentanoate (3e).** The product (91 mg, 73% yield) was purified with silica gel chromatography (Petroleum ether/Ethyl acetate = 80:1) as pale yellow liquid.  $^1\text{H}$  NMR (400 MHz,  $\text{CDCl}_3$ )  $\delta$  7.97-7.86 (m, 2H), 7.82 (d,  $J = 8.0$  Hz, 1H), 7.60-7.48 (m, 2H), 7.48-7.40 (m, 1H), 7.39-7.34 (m, 1H), 4.63-4.52 (m, 1H), 4.35-4.20 (m, 2H), 3.75-3.65 (m, 2H), 3.13-2.78 (m, 2H), 1.30 (t,  $J = 7.0$  Hz, 3H).  $^{19}\text{F}$  NMR (376 MHz,  $\text{CDCl}_3$ )  $\delta$  -109.1 (dt,  $J = 263.6$  Hz, 14.7 Hz, 1F), -113.1 (dt,  $J = 263.6$  Hz, 15.0 Hz, 1F).  $^{13}\text{C}$  NMR (101 MHz,  $\text{CDCl}_3$ )  $\delta$  163.3 (t,  $J = 32.5$  Hz), 134.9, 134.0, 131.5, 129.1, 128.2, 127.9, 126.5, 125.8, 125.2, 122.9, 115.3 (t,  $J = 253.7$  Hz), 63.3, 44.9 (d,  $J = 1.3$  Hz), 44.7 (t,  $J = 23.5$  Hz), 20.9 (t,  $J = 3.8$  Hz), 13.8. HRMS (ESI,  $m/z$ ):  $(\text{M}+\text{Na})^+$  Calculated for  $\text{C}_{17}\text{H}_{17}\text{F}_2\text{INaO}_2$ : 441.0134; Found: 441.0140.

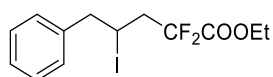

**Ethyl 2,2-difluoro-4-iodo-5-phenylpentanoate (3f).** This compound is known.<sup>2</sup> The product (93 mg, 84% yield) was purified with silica gel chromatography (Petroleum ether/Ethyl acetate = 50:1) as pale yellow liquid.  $^1\text{H}$  NMR (400 MHz,  $\text{CDCl}_3$ )  $\delta$  7.38-7.27 (m, 3H), 7.20 (d,  $J = 7.2$  Hz, 2H), 4.40-4.30 (m, 1H), 4.34 (q,  $J = 7.2$  Hz, 2H), 3.30-3.16 (m, 2H), 3.00-2.72 (m, 2H), 1.37 (t,  $J = 7.2$  Hz, 3H).  $^{19}\text{F}$  NMR (376 MHz,  $\text{CDCl}_3$ )  $\delta$  -101.8 (dt,  $J = 175.6$  Hz, 10.5 Hz, 1F), -106.4 (dt,  $J = 175.6$  Hz, 11.3 Hz, 1F).  $^{13}\text{C}$  NMR (101 MHz,  $\text{CDCl}_3$ )  $\delta$  163.4 (t,  $J = 32.6$  Hz), 138.8, 129.0, 128.5, 127.2, 115.2 (t,  $J = 253.6$  Hz), 63.3, 47.1, 44.3 (t,  $J = 23.6$  Hz), 21.9 (t,  $J = 3.4$  Hz), 13.9.

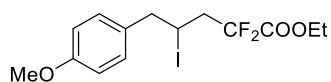

**Ethyl 2,2-difluoro-4-iodo-5-(4-methoxyphenyl)pentanoate (3g).** The product (108 mg, 91% yield) was purified with silica gel chromatography (Petroleum ether/Ethyl acetate = 50:1) as pale yellow liquid.  $^1\text{H}$  NMR (400 MHz,  $\text{CDCl}_3$ )  $\delta$  7.11 (d,  $J = 8.6$  Hz, 2H), 6.86 (d,  $J = 8.6$  Hz, 2H), 4.34 (q,  $J = 7.2$  Hz, 2H), 4.29 (m, 1H), 3.80 (s, 3H), 3.21-3.11 (m, 2H), 2.96-2.70 (m, 2H), 1.36 (t,  $J = 7.2$  Hz, 3H).  $^{19}\text{F}$  NMR (376 MHz,  $\text{CDCl}_3$ )

$\delta$  -101.7 (ddd,  $J = 263.2$  Hz, 16.5 Hz, 13.5 Hz, 1F), -106.5 (dt,  $J = 263.2$  Hz, 16.9 Hz, 1F).  $^{13}\text{C}$  NMR (101 MHz,  $\text{CDCl}_3$ )  $\delta$  163.4 (t,  $J = 32.5$  Hz), 158.7, 130.9, 130.0, 115.2 (t,  $J = 253.8$  Hz), 113.9, 63.2, 55.2, 46.4, 44.1 (t,  $J = 23.6$  Hz), 22.7 (t,  $J = 3.7$  Hz), 13.9. HRMS (ESI,  $m/z$ ): (M+H)<sup>+</sup> Calculated for  $\text{C}_{14}\text{H}_{18}\text{F}_2\text{O}_3\text{I}$ : 399.0263; Found: 399.0262.

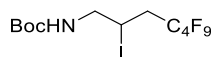

**Tert-butyl (4,4,5,5,6,6,7,7,7-nonafluoro-2-iodoheptyl)carbamate (3h).** This compound is known.<sup>3</sup> The product (109 mg, 72% yield) was purified with silica gel chromatography (Petroleum ether/Ethyl acetate = 10:1) as a light yellow solid.  $^1\text{H}$  NMR (400 MHz,  $\text{CDCl}_3$ )  $\delta$  5.01 (br, 1H), 4.40-4.34 (m, 1H), 3.63-3.40 (m, 2H), 2.95-2.68 (m, 2H), 1.45 (s, 9H).  $^{19}\text{F}$  NMR (376 MHz,  $\text{CDCl}_3$ )  $\delta$  -81.1 (t,  $J = 6.2$  Hz, 3F), -112.7 – -124.5 (m, 2F), -124.6 (m, 2F), -125.9 (t,  $J = 7.7$  Hz, 2F).  $^{13}\text{C}$  NMR (101 MHz,  $\text{CDCl}_3$ )  $\delta$  155.6, 120.0-110.0 (m), 80.2, 48.9, 38.5 (t,  $J = 21.5$  Hz), 28.2, 18.6.

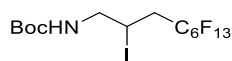

**Tert-butyl (4,4,5,5,6,6,7,7,8,8,9,9,9-tridecafluoro-2-iodononyl)carbamate (3i).** The product (126 mg, 70% yield) was purified with silica gel chromatography (Petroleum ether/Ethyl acetate = 10:1) as a white solid.  $^1\text{H}$  NMR (400 MHz,  $\text{CDCl}_3$ )  $\delta$  4.98 (br, 1H), 4.41-4.34 (m, 1H), 3.64-3.41 (m, 2H), 2.94-2.70 (m, 2H), 1.45 (s, 9H).  $^{19}\text{F}$  NMR (376 MHz,  $\text{CDCl}_3$ )  $\delta$  -80.8 (m, 3F), -112.3 – -114.5 (m, 2F), -121.8 (m, 2F), -122.9 (m, 2F), -123.7 (m, 2F), -126.2 (m, 2F).  $^{13}\text{C}$  NMR (101 MHz,  $\text{CDCl}_3$ )  $\delta$  155.6, 120.0-110.0 (m), 80.3, 49.0, 38.6 (t,  $J = 21.5$  Hz), 28.2, 18.7. HRMS (ESI,  $m/z$ ): (M-H)<sup>-</sup> Calculated for  $\text{C}_{14}\text{H}_{14}\text{F}_{13}\text{INO}_2$ : 601.9867; Found: 601.9877.

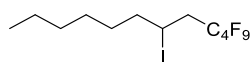

**1,1,1,2,2,3,3,4,4-nonafluoro-6-iodododecane (3j).** This compound is known.<sup>4</sup> The product (104 mg, 76% yield) was purified with silica gel chromatography (Petroleum ether 100%) as pale yellow liquid.  $^1\text{H}$  NMR (400 MHz,  $\text{CDCl}_3$ )  $\delta$  4.37-4.30 (m, 1H), 3.00-2.66 (m, 2H), 1.89-1.70 (m, 2H), 1.60-1.24 (m, 8H), 0.90 (t,  $J = 6.8$  Hz, 3H).  $^{19}\text{F}$



NMR (376 MHz, CDCl<sub>3</sub>)  $\delta$  -88.4 (m, 3F), -118.8 – -122.8 (m, 2F), -131.9 (m, 2F), -133.2 (m, 2F). <sup>13</sup>C NMR (101 MHz, CDCl<sub>3</sub>)  $\delta$  120.0-110.0 (m), 41.6 (t,  $J$  = 21.1 Hz), 40.3 (d,  $J$  = 1.5 Hz), 31.6, 29.5, 28.2, 22.5, 20.8, 14.0.

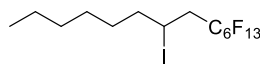

**1,1,1,2,2,3,3,4,4,5,5,6,6-tridecafluoro-8-iodotetradecane (3k).** This compound is known.<sup>5</sup> The product (120 mg, 72% yield) was purified with silica gel chromatography (Petroleum ether 100%) as pale yellow liquid. <sup>1</sup>H NMR (400 MHz, CDCl<sub>3</sub>)  $\delta$  4.37-4.30 (m, 1H), 2.99-2.70 (m, 2H), 1.88-1.72 (m, 2H), 1.60-1.49 (m, 1H), 1.47-1.25 (m, 7H), 0.90 (t,  $J$  = 6.6 Hz, 3H). <sup>19</sup>F NMR (376 MHz, CDCl<sub>3</sub>)  $\delta$  -80.8 (m, 3F), -111.6 – -114.9 (m, 2F), -121.8 (m, 2F), -122.9 (m, 2F), -123.7 (m, 2F), -126.2 (m, 2F). <sup>13</sup>C NMR (101 MHz, CDCl<sub>3</sub>)  $\delta$  122.0-104.0 (m), 41.7 (t,  $J$  = 21.0 Hz), 40.4 (d,  $J$  = 1.9 Hz), 31.6, 29.6, 28.2, 22.6, 20.9, 14.0.

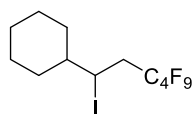

**(3,3,4,4,5,5,6,6,6-nonafluoro-1-iodohexyl)cyclohexane (3l).** This compound is known.<sup>6</sup> The product (108 mg, 79% yield) was purified with silica gel chromatography (Petroleum ether 100%) as pale yellow liquid. <sup>1</sup>H NMR (400 MHz, CDCl<sub>3</sub>)  $\delta$  4.35 (td,  $J$  = 6.8 Hz, 3.2 Hz, 1H), 2.91-2.76 (m, 2H), 1.85-1.76 (m, 2H), 1.75-1.62 (m, 3H), 1.44-1.06 (m, 5H), 0.88-0.78 (m, 1H). <sup>19</sup>F NMR (376 MHz, CDCl<sub>3</sub>)  $\delta$  -81.1 (m, 3F), -112.3 – -115.5 (m, 2F), -124.6 (m, 2F), -126.0 (m, 2F). <sup>13</sup>C NMR (101 MHz, CDCl<sub>3</sub>)  $\delta$  120.0-110.0 (m), 44.2, 39.0 (t,  $J$  = 20.9 Hz), 33.7, 30.3, 29.7, 26.0, 25.7, 25.5.

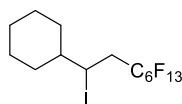

**(3,3,4,4,5,5,6,6,7,7,8,8,8-tridecafluoro-1-iodooctyl)cyclohexane (3m).** The product (132 mg, 79% yield) was purified with silica gel chromatography (Petroleum ether 100%) as pale yellow liquid. <sup>1</sup>H NMR (400 MHz, CDCl<sub>3</sub>)  $\delta$  4.35 (td,  $J$  = 6.4 Hz, 2.8

Hz, 1H), 2.93-2.75 (m, 2H), 1.86-1.75 (m, 2H), 1.75-1.61 (m, 3H), 1.44-1.04 (m, 5H), 0.88-0.77 (m, 1H).  $^{19}\text{F}$  NMR (376 MHz,  $\text{CDCl}_3$ )  $\delta$  -81.0 (m, 3F), -112.4 – -115.2 (m, 2F), -121.9 (m, 2F), -123.0 (m, 2F), -123.7 (m, 2F), -126.3 (m, 2F).  $^{13}\text{C}$  NMR (101 MHz,  $\text{CDCl}_3$ )  $\delta$  122.0-104.0 (m), 44.2, 39.1 (t,  $J = 20.8$  Hz), 33.7, 30.3, 29.7, 26.0, 25.8, 25.5. HRMS (EI): Calculated for  $\text{C}_{14}\text{H}_{14}\text{F}_{13}\text{I}$ : 555.9933; Found: 555.9942.

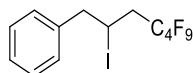

**(4,4,5,5,6,6,7,7,7-nonafluoro-2-iodoheptyl)benzene (3n).** This compound is known.<sup>6</sup> The product (117 mg, 84% yield) was purified with silica gel chromatography (Petroleum ether 100%) as pale yellow liquid.  $^1\text{H}$  NMR (400 MHz,  $\text{CDCl}_3$ )  $\delta$  7.39-7.29 (m, 3H), 7.21 (d,  $J = 7.6$  Hz, 2H), 4.52-4.43 (m, 1H), 3.31 (dd,  $J = 14.4$  Hz, 5.6 Hz, 1H), 3.21 (dd,  $J = 14.4$  Hz, 8.8 Hz, 1H), 3.02-2.78 (m, 2H).  $^{19}\text{F}$  NMR (376 MHz,  $\text{CDCl}_3$ )  $\delta$  -81.1 (m, 3F), -111.8 – -114.6 (m, 2F), -124.6 (m, 2F), -126.0 (m, 2F).  $^{13}\text{C}$  NMR (101 MHz,  $\text{CDCl}_3$ )  $\delta$  138.5, 128.9, 128.6, 127.3, 122.0-104.0 (m), 47.0 (d,  $J = 1.5$  Hz), 40.7 (t,  $J = 21.0$  Hz), 19.3.

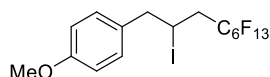

**1-methoxy-4-(4,4,5,5,6,6,7,7,8,8,9,9,9-tridecafluoro-2-iodononyl)benzene (3o).** The product (121 mg, 68% yield) was purified with silica gel chromatography (Petroleum ether 100%) as pale yellow liquid.  $^1\text{H}$  NMR (400 MHz,  $\text{CDCl}_3$ )  $\delta$  7.12 (d,  $J = 8.6$  Hz, 2H), 6.88 (d,  $J = 8.6$  Hz, 2H), 4.47-4.38 (m, 1H), 3.81 (s, 3H), 3.22 (dd,  $J = 14.8$  Hz, 6.0 Hz, 1H), 3.15 (dd,  $J = 14.8$  Hz, 8.8 Hz, 1H), 2.96-2.76 (m, 2H).  $^{19}\text{F}$  NMR (376 MHz,  $\text{CDCl}_3$ )  $\delta$  -80.8 – -81.0 (m, 3F), -111.8 – -114.1 (m, 2F), -121.8 (m, 2F), -122.9 (m, 2F), -123.7 (m, 2F), -126.2 (m, 2F).  $^{13}\text{C}$  NMR (101 MHz,  $\text{CDCl}_3$ )  $\delta$  158.8, 130.6, 130.0, 113.9, 122.0-104.0 (m), 55.2, 46.2, 40.6 (t,  $J = 21.0$  Hz), 20.2. HRMS (EI): Calculated for  $\text{C}_{16}\text{H}_{12}\text{F}_{13}\text{OI}$ : 593.9725; Found: 593.9728.

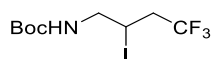

**Tert-butyl (4,4,4-trifluoro-2-iodobutyl)carbamate (3p).** This compound is known.<sup>3</sup>

The product (76 mg, 72% yield) was purified with silica gel chromatography (Petroleum ether/Ethyl acetate = 5:1) as a white solid.  $^1\text{H}$  NMR (400 MHz,  $\text{CDCl}_3$ )  $\delta$  5.09 (br, 1H), 4.27-4.18 (m, 1H), 3.55-3.40 (m, 2H), 2.87-2.72 (m, 2H), 1.43 (s, 9H).  $^{19}\text{F}$  NMR (376 MHz,  $\text{CDCl}_3$ )  $\delta$  -64.0 (t,  $J = 10.0$  Hz, 3F).  $^{13}\text{C}$  NMR (101 MHz,  $\text{CDCl}_3$ )  $\delta$  155.6, 125.4 (q,  $J = 279.4$  Hz), 80.1, 48.5, 41.6 (q,  $J = 29.3$  Hz), 28.2, 20.0.

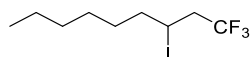

**1,1,1-trifluoro-3-iodononane (3q).** This compound is known.<sup>7</sup> The product (51 mg, 55% yield) was purified with silica gel chromatography (Petroleum ether/Ethyl acetate = 100:1) as colorless oil.  $^1\text{H}$  NMR (400 MHz,  $\text{CDCl}_3$ )  $\delta$  4.23-4.16 (m, 1H), 2.97-2.71 (m, 2H), 1.85-1.67 (m, 2H), 1.58-1.48 (m, 1H), 1.44-1.24 (m, 7H), 0.89 (t,  $J = 6.8$  Hz, 3H).  $^{19}\text{F}$  NMR (376 MHz,  $\text{CDCl}_3$ )  $\delta$  -64.0 (t,  $J = 10.3$  Hz, 3F).  $^{13}\text{C}$  NMR (101 MHz,  $\text{CDCl}_3$ )  $\delta$  125.6 (q,  $J = 280.0$  Hz), 44.9 (q,  $J = 28.3$  Hz), 39.6, 31.6, 29.4, 28.2, 22.5, 21.9 (q,  $J = 2.8$  Hz), 14.0.

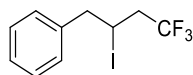

**(4,4,4-trifluoro-2-iodobutyl)benzene (3r).** This compound is known.<sup>8</sup> The product (39 mg, 41% yield) was purified with silica gel chromatography (Petroleum ether 100%) as colorless oil.  $^1\text{H}$  NMR (400 MHz,  $\text{CDCl}_3$ )  $\delta$  7.38-7.29 (m, 3H), 7.20 (d,  $J = 6.8$  Hz, 2H), 4.38-4.30 (m, 1H), 3.30-3.18 (m, 2H), 2.95-2.75 (m, 2H).  $^{19}\text{F}$  NMR (376 MHz,  $\text{CDCl}_3$ )  $\delta$  -63.7 (t,  $J = 10.0$  Hz, 3F).  $^{13}\text{C}$  NMR (101 MHz,  $\text{CDCl}_3$ )  $\delta$  138.5, 128.9, 128.6, 127.3, 125.5 (q,  $J = 279.7$  Hz), 46.6, 43.7 (q,  $J = 28.6$  Hz), 20.2 (q,  $J = 2.7$  Hz).

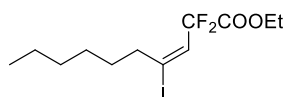

**Ethyl (*E*)-2,2-difluoro-4-iododec-3-enoate (5a).** This compound is known.<sup>9</sup> The product (94 mg, 87% yield,  $Z:E = 1:4.3$ ) was purified with silica gel chromatography (Petroleum ether/Ethyl acetate = 100:1) as colorless liquid.  $^1\text{H}$  NMR (400 MHz,  $\text{CDCl}_3$ )  $\delta$  6.39 (t,  $J = 13.2$  Hz, 1H), 4.32 (q,  $J = 7.2$  Hz, 2H), 2.59 (t,  $J = 7.2$  Hz, 2H), 1.60-1.48

(m, 2H), 1.35 (t,  $J = 7.2$  Hz, 3H), 1.40-1.25 (m, 6H), 0.89 (t,  $J = 6.4$  Hz, 3H).  $^{19}\text{F}$  NMR (376 MHz,  $\text{CDCl}_3$ )  $\delta$  -105.0 (d,  $J = 6.8$  Hz, 2F, *E*).  $^{13}\text{C}$  NMR (101 MHz,  $\text{CDCl}_3$ )  $\delta$  163.2 (t,  $J = 34.4$  Hz), 131.2 (t,  $J = 27.2$  Hz), 119.6 (t,  $J = 7.7$  Hz), 111.5 (t,  $J = 253.5$  Hz), 63.3, 40.7, 31.5, 29.8, 28.0, 22.5, 14.0, 13.9.

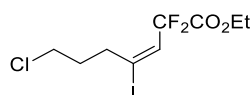

**Ethyl (*E*)-7-chloro-2,2-difluoro-4-iodohept-3-enoate (5b).** The product (84 mg, 80% yield, *Z*:*E* = 1:4.3) was purified with silica gel chromatography (Petroleum ether/Ethyl acetate = 100:1) as colorless liquid.  $^1\text{H}$  NMR (400 MHz,  $\text{CDCl}_3$ )  $\delta$  6.45 (t,  $J = 13.2$  Hz, 1H), 4.34 (q,  $J = 7.2$  Hz, 2H), 3.55 (t,  $J = 6.6$  Hz, 2H), 2.79 (t,  $J = 7.4$  Hz, 2H), 2.07-1.99 (m, 2H), 1.35 (t,  $J = 7.2$  Hz, 3H).  $^{19}\text{F}$  NMR (376 MHz,  $\text{CDCl}_3$ )  $\delta$  -97.9 (d,  $J = 13.2$  Hz, 2F, *E*).  $^{13}\text{C}$  NMR (101 MHz,  $\text{CDCl}_3$ )  $\delta$  163.0 (t,  $J = 34.3$  Hz), 132.3 (t,  $J = 27.1$  Hz), 116.5 (t,  $J = 7.5$  Hz), 111.5 (t,  $J = 253.9$  Hz), 63.5, 43.1, 38.4 (t,  $J = 2.2$  Hz), 32.7, 13.9. HRMS (ESI,  $m/z$ ): ( $\text{M}+\text{Na}$ ) $^+$  Calculated for  $\text{C}_9\text{H}_{12}\text{ClF}_2\text{INaO}_2$ : 374.9431; Found: 374.9444.

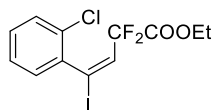

**Ethyl (*E*)-4-(2-chlorophenyl)-2,2-difluoro-4-iodobut-3-enoate (5c).** This compound is known.<sup>10</sup> The product (94 mg, 81% yield, *Z*:*E* = 1:33) was purified with silica gel chromatography (Petroleum ether/Ethyl acetate = 100:1) as colorless liquid.  $^1\text{H}$  NMR (400 MHz,  $\text{CDCl}_3$ )  $\delta$  7.38-7.34 (m, 1H), 7.30-7.19 (m, 3H), 6.79 (t,  $J = 11.4$  Hz, 1H), 4.19-4.10 (m, 2H), 1.28 (t,  $J = 7.2$  Hz, 3H).  $^{19}\text{F}$  NMR (376 MHz,  $\text{CDCl}_3$ )  $\delta$  -98.0 (m, 2F, *E*).  $^{13}\text{C}$  NMR (101 MHz,  $\text{CDCl}_3$ )  $\delta$  162.2 (t,  $J = 33.6$  Hz), 138.8, 134.6 (t,  $J = 27.6$  Hz), 131.4, 130.4, 129.7, 128.8 (t,  $J = 2.0$  Hz), 126.5, 110.8 (t,  $J = 253.9$  Hz), 103.3 (t,  $J = 9.1$  Hz), 63.3, 13.7.

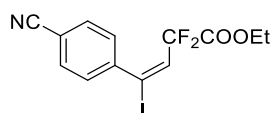

**Ethyl (*E*)-4-(4-cyanophenyl)-2,2-difluoro-4-iodobut-3-enoate (5d).** This compound is known.<sup>10</sup> The product (70 mg, 62% yield, *Z*:*E* = 1:21) was purified with silica gel chromatography (Petroleum ether/Ethyl acetate = 30:1) as colorless liquid. <sup>1</sup>H NMR (400 MHz, CDCl<sub>3</sub>) δ 7.62 (d, *J* = 8.2 Hz, 2H), 7.39 (d, *J* = 8.2 Hz, 2H), 6.75 (t, *J* = 11.8 Hz, 1H), 4.16 (q, *J* = 7.2 Hz, 2H), 1.27 (t, *J* = 7.2 Hz, 3H). <sup>19</sup>F NMR (376 MHz, CDCl<sub>3</sub>) δ -96.0 (d, *J* = 11.7 Hz, 2F, *E*). <sup>13</sup>C NMR (101 MHz, CDCl<sub>3</sub>) δ 162.3 (t, *J* = 33.3 Hz), 145.3, 133.8 (t, *J* = 27.0 Hz), 131.8, 128.2 (t, *J* = 2.2 Hz), 118.0, 112.9, 110.8 (t, *J* = 253.7 Hz), 105.0 (t, *J* = 8.5 Hz), 63.5, 13.7.

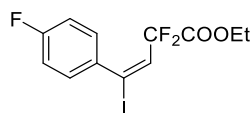

**Ethyl (*E*)-2,2-difluoro-4-(4-fluorophenyl)-4-iodobut-3-enoate (5e).** This compound is known.<sup>10</sup> The product (94 mg, 85% yield, *Z*:*E* = 1:20) was purified with silica gel chromatography (Petroleum ether/Ethyl acetate = 100:1) as colorless liquid. <sup>1</sup>H NMR (400 MHz, CDCl<sub>3</sub>) δ 7.30 (dd, *J* = 8.6 Hz, 5.4 Hz, 2H), 7.01 (t, *J* = 8.6 Hz, 2H), 6.71 (t, *J* = 11.2 Hz, 1H), 4.06 (q, *J* = 7.2 Hz, 2H), 1.23 (t, *J* = 7.2 Hz, 3H). <sup>19</sup>F NMR (376 MHz, CDCl<sub>3</sub>) δ -94.4 (d, *J* = 7.5 Hz, 2F, *E*), -110.7 (m, 1F). <sup>13</sup>C NMR (101 MHz, CDCl<sub>3</sub>) δ 162.8 (d, *J* = 251.8 Hz), 162.4 (t, *J* = 33.4 Hz), 136.8 (d, *J* = 3.4 Hz), 133.3 (t, *J* = 28.1 Hz), 129.9 (td, *J* = 8.7 Hz, 2.1 Hz), 115.1 (d, *J* = 22.2 Hz), 110.8 (t, *J* = 251.9 Hz), 107.3 (t, *J* = 9.7 Hz), 63.2, 13.7.

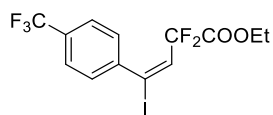

**Ethyl (*E*)-2,2-difluoro-4-iodo-4-(4-(trifluoromethyl)phenyl)but-3-enoate (5f).** This compound is known.<sup>10</sup> The product (102 mg, 81% yield, *Z*:*E* = 1:24) was purified with silica gel chromatography (Petroleum ether/Ethyl acetate = 100:1) as colorless liquid. <sup>1</sup>H NMR (400 MHz, CDCl<sub>3</sub>) δ 7.59 (d, *J* = 8.0 Hz, 2H), 7.41 (d, *J* = 8.0 Hz, 2H), 6.76 (t, *J* = 11.4 Hz, 1H), 4.09 (q, *J* = 7.2 Hz, 2H), 1.24 (t, *J* = 7.2 Hz, 3H). <sup>19</sup>F NMR (376 MHz, CDCl<sub>3</sub>) δ -63.0 (s, 3F), -95.3 (d, *J* = 11.7 Hz, 2F, *E*). <sup>13</sup>C NMR (101 MHz, CDCl<sub>3</sub>) δ 162.5 (t, *J* = 33.4 Hz), 144.3, 133.8 (t, *J* = 27.4 Hz), 131.2 (q, *J* = 33.0 Hz), 128.0 (t,

$J = 2.0$  Hz), 125.1 (q,  $J = 3.8$  Hz), 123.6 (q,  $J = 273.4$  Hz), 110.8 (t,  $J = 253.0$  Hz), 105.9 (t,  $J = 8.9$  Hz), 63.4, 13.7.

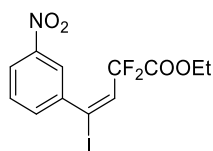

**Ethyl (E)-2,2-difluoro-4-iodo-4-(3-nitrophenyl)but-3-enoate (5g).** The product (83 mg, 70% yield,  $Z:E = 1:32$ ) was purified with silica gel chromatography (Petroleum ether/Ethyl acetate = 30:1) as colorless liquid.  $^1\text{H}$  NMR (400 MHz,  $\text{CDCl}_3$ )  $\delta$  8.19-8.14 (m, 2H), 7.62 (d,  $J = 7.6$  Hz, 1H), 7.53 (t,  $J = 7.8$  Hz, 1H), 6.79 (t,  $J = 12.0$  Hz, 1H), 4.20 (q,  $J = 7.2$  Hz, 2H), 1.30 (t,  $J = 7.2$  Hz, 3H).  $^{19}\text{F}$  NMR (376 MHz,  $\text{CDCl}_3$ )  $\delta$  -96.4 (d,  $J = 11.7$  Hz, 2F, *E*).  $^{13}\text{C}$  NMR (101 MHz,  $\text{CDCl}_3$ )  $\delta$  162.3 (t,  $J = 33.4$  Hz), 147.5, 142.5, 134.3 (t,  $J = 26.9$  Hz), 133.4 (t,  $J = 2.1$  Hz), 129.2, 123.9, 122.5 (t,  $J = 2.2$  Hz), 110.9 (t,  $J = 253.7$  Hz), 104.2 (t,  $J = 8.3$  Hz), 63.6, 13.8. HRMS (EI,  $m/z$ ): Calculated for  $\text{C}_{12}\text{H}_{10}\text{F}_2\text{INO}_4$ : 396.9623; Found: 396.9630.

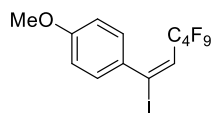

**(E)-1-methoxy-4-(3,3,4,4,5,5,6,6,6-nonafluoro-1-iodohex-1-en-1-yl)benzene (5h).** The product (110 mg, 77% yield) was purified with silica gel chromatography (Petroleum ether 100%) as colorless liquid.  $^1\text{H}$  NMR (400 MHz,  $\text{CDCl}_3$ )  $\delta$  7.27 (d,  $J = 8.6$  Hz, 2H), 6.85 (d,  $J = 8.6$  Hz, 2H), 6.56 (t,  $J = 13.6$  Hz, 1H), 3.82 (s, 3H).  $^{19}\text{F}$  NMR (376 MHz,  $\text{CDCl}_3$ )  $\delta$  -81.1 (m, 3F), -105.1 (m, 2F), -123.9 (m, 2F), -125.9 (m, 2F).  $^{13}\text{C}$  NMR (101 MHz,  $\text{CDCl}_3$ )  $\delta$  160.2, 133.6, 128.8 (t,  $J = 2.2$  Hz), 126.3 (t,  $J = 21.8$  Hz), 118.0-110.0 (m), 113.5 (t,  $J = 6.3$  Hz), 113.3, 55.2. MS (EI):  $m/z$  (%) 478 ( $\text{M}^+$ ), 351 (100), 132. HRMS (EI): Calculated for  $\text{C}_{13}\text{H}_8\text{F}_9\text{OI}$  ( $\text{M}^+$ ): 477.9476; Found: 477.9474.

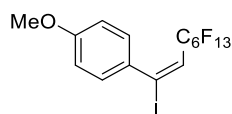

**(E)-1-methoxy-4-(3,3,4,4,5,5,6,6,7,7,8,8,8-tridecafluoro-1-iodooct-1-en-1-yl)**

**benzene (5i).** The product (130 mg, 75% yield) was purified with silica gel chromatography (Petroleum ether 100%) as colorless liquid.  $^1\text{H}$  NMR (400 MHz,  $\text{CDCl}_3$ )  $\delta$  7.27 (d,  $J = 8.6$  Hz, 2H), 6.85 (d,  $J = 8.6$  Hz, 2H), 6.56 (t,  $J = 13.4$  Hz, 1H), 3.82 (s, 3H).  $^{19}\text{F}$  NMR (376 MHz,  $\text{CDCl}_3$ )  $\delta$  -80.9 (m, 3F), -104.9 (m, 2F), -121.8 (m, 2F), -123.0 (m, 4F), -126.3 (m, 2F).  $^{13}\text{C}$  NMR (101 MHz,  $\text{CDCl}_3$ )  $\delta$  160.2, 133.6, 128.8 (t,  $J = 2.1$  Hz), 126.4 (t,  $J = 21.9$  Hz), 113.5 (t,  $J = 6.3$  Hz), 113.3, 110.0-104.0 (m), 55.3. HRMS (EI): Calculated for  $\text{C}_{15}\text{H}_8\text{F}_{13}\text{OI}$ : 577.9412; Found: 577.9419.

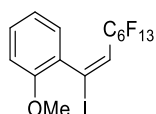

**(E)-1-methoxy-2-(3,3,4,4,5,5,6,6,7,7,8,8,8-tridecafluoro-1-iodooct-1-en-1-**

**yl)benzene (5j).** The product (128 mg, 74% yield) was purified with silica gel chromatography (Petroleum ether 100%) as colorless liquid.  $^1\text{H}$  NMR (400 MHz,  $\text{CDCl}_3$ )  $\delta$  7.31 (t,  $J = 8.0$  Hz, 1H), 7.13 (d,  $J = 7.6$  Hz, 1H), 6.92 (t,  $J = 8.0$  Hz, 1H), 6.87 (d,  $J = 8.4$  Hz, 1H), 6.60 (t,  $J = 13.2$  Hz, 1H), 3.88 (s, 3H).  $^{19}\text{F}$  NMR (376 MHz,  $\text{CDCl}_3$ )  $\delta$  -80.9 (t,  $J = 9.8$  Hz, 3F), -107.9 (q,  $J = 13.2$  Hz, 2F), -121.9 (m, 2F), -123.0 (m, 2F), -123.3 (m, 2F), -126.3 (m, 2F).  $^{13}\text{C}$  NMR (101 MHz,  $\text{CDCl}_3$ )  $\delta$  154.9, 130.7, 129.9, 128.0 (t,  $J = 22.1$  Hz), 127.8, 120.0, 111.0, 108.2 (t,  $J = 6.1$  Hz), 110.0-104.0 (m), 55.5. HRMS (EI): Calculated for  $\text{C}_{15}\text{H}_8\text{F}_{13}\text{OI}$ : 577.9412; Found: 577.9416.

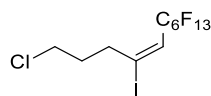

**(E)-1-chloro-6,6,7,7,8,8,9,9,10,10,11,11,11-tridecafluoro-4-iodoundec-4-ene (5k).**

The product (99 mg, 60% yield) was purified with silica gel chromatography (Petroleum ether 100%) as colorless liquid.  $^1\text{H}$  NMR (400 MHz,  $\text{CDCl}_3$ )  $\delta$  6.39 (t,  $J = 14.4$  Hz, 1H), 3.56 (t,  $J = 6.4$  Hz, 2H), 2.83 (t,  $J = 7.4$  Hz, 2H), 2.12-2.02 (m, 2H).  $^{19}\text{F}$  NMR (376 MHz,  $\text{CDCl}_3$ )  $\delta$  -81.0 (t,  $J = 9.8$  Hz, 3F), -105.7 (q,  $J = 13.0$  Hz, 2F), -121.8 (m, 2F), -123.0 (m, 2F), -123.3 (m, 2F), -126.3 (m, 2F).  $^{13}\text{C}$  NMR (101 MHz,  $\text{CDCl}_3$ )  $\delta$  127.7 (t,  $J = 24.0$  Hz), 119.9 (t,  $J = 6.6$  Hz), 110.0-104.0 (m), 43.0, 38.8 (t,  $J = 2.8$  Hz), 32.8. HRMS (EI): Calculated for  $\text{C}_{11}\text{H}_7\text{F}_{13}\text{ClI}$ : 547.9073; Found: 547.9068.

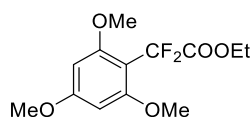

**Ethyl 2,2-difluoro-2-(2,4,6-trimethoxyphenyl)acetate (7a).** This compound is known.<sup>11</sup> The product (82 mg, 94% yield) was purified with silica gel chromatography (Petroleum ether/Ethyl acetate = 10:1) as colorless liquid. <sup>1</sup>H NMR (400 MHz, CDCl<sub>3</sub>) δ 6.11 (s, 2H), 4.31 (q, *J* = 7.2 Hz, 2H), 3.81 (s, 3H), 3.78 (s, 6H), 1.32 (t, *J* = 7.2 Hz, 3H). <sup>19</sup>F NMR (376 MHz, CDCl<sub>3</sub>) δ -96.4 (s, 2F). <sup>13</sup>C NMR (101 MHz, CDCl<sub>3</sub>) δ 164.8 (t, *J* = 33.4 Hz), 163.2, 160.1 (t, *J* = 2.6 Hz), 113.3 (t, *J* = 248.7 Hz), 102.6 (t, *J* = 25.2 Hz), 91.4, 62.3, 56.1, 55.3, 14.0.

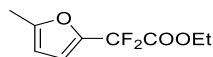

**Ethyl 2,2-difluoro-2-(5-methylfuran-2-yl)acetate (7b).** This compound is known.<sup>12</sup> The product (36 mg, 59% yield) was purified with silica gel chromatography (Petroleum ether/Ethyl acetate = 100:1) as colorless liquid. <sup>1</sup>H NMR (400 MHz, CDCl<sub>3</sub>) δ 6.63-6.61 (m, 1H), 6.05-6.02 (m, 1H), 4.38 (q, *J* = 7.2 Hz, 2H), 2.33-2.31 (m, 3H), 1.36 (t, *J* = 7.2 Hz, 3H). <sup>19</sup>F NMR (376 MHz, CDCl<sub>3</sub>) δ -102.1 (s, 2F). <sup>13</sup>C NMR (101 MHz, CDCl<sub>3</sub>) δ 162.6 (t, *J* = 34.0 Hz), 155.2 (t, *J* = 1.8 Hz), 142.6, 112.6 (t, *J* = 3.8 Hz), 108.7 (t, *J* = 247.9 Hz), 106.9 (t, *J* = 0.9 Hz), 63.4, 13.9, 13.5.

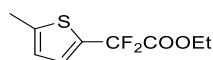

**Ethyl 2,2-difluoro-2-(5-methylthiophen-2-yl)acetate (7c).** This compound is known.<sup>13</sup> The product (37 mg, 56% yield) was purified with silica gel chromatography (Petroleum ether/Ethyl acetate = 50:1) as colorless liquid. <sup>1</sup>H NMR (400 MHz, CDCl<sub>3</sub>) δ 7.18-7.16 (m, 1H), 6.72-6.69 (m, 1H), 4.35 (q, *J* = 7.2 Hz, 2H), 2.51-2.49 (m, 3H), 1.35 (t, *J* = 7.2 Hz, 3H). <sup>19</sup>F NMR (376 MHz, CDCl<sub>3</sub>) δ -92.9 (s, 2F). <sup>13</sup>C NMR (101 MHz, CDCl<sub>3</sub>) δ 163.4 (t, *J* = 35.5 Hz), 144.2 (t, *J* = 1.8 Hz), 131.1 (t, *J* = 30.3 Hz), 128.5 (t, *J* = 5.8 Hz), 125.3, 111.6 (t, *J* = 251.0 Hz), 63.3, 15.2, 13.9.



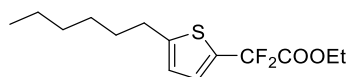

**Ethyl 2,2-difluoro-2-(5-hexylthiophen-2-yl)acetate (7d).** The product (60 mg, 69% yield) was purified with silica gel chromatography (Petroleum ether/Ethyl acetate = 100:1) as colorless liquid.  $^1\text{H}$  NMR (400 MHz,  $\text{CDCl}_3$ )  $\delta$  7.20-7.16 (m, 1H), 6.76-6.71 (m, 1H), 4.36 (q,  $J = 7.2$  Hz, 2H), 2.80 (t,  $J = 7.2$  Hz, 2H), 1.71-1.63 (m, 2H), 1.40-1.27 (m, 6H), 1.36 (t,  $J = 7.2$  Hz, 3H), 0.89 (t,  $J = 7.2$  Hz, 3H).  $^{19}\text{F}$  NMR (376 MHz,  $\text{CDCl}_3$ )  $\delta$  -92.7 (s, 2F).  $^{13}\text{C}$  NMR (101 MHz,  $\text{CDCl}_3$ )  $\delta$  163.5 (t,  $J = 35.8$  Hz), 150.4, 130.8 (t,  $J = 30.5$  Hz), 128.3 (t,  $J = 5.8$  Hz), 124.1, 111.7 (t,  $J = 250.3$  Hz), 63.3, 31.5, 31.4, 30.0, 28.7, 22.5, 14.0, 13.9. HRMS (ESI,  $m/z$ ): ( $\text{M}+\text{Na}$ ) $^+$  Calculated for  $\text{C}_{14}\text{H}_{20}\text{F}_2\text{NaO}_2\text{S}$ : 313.1044; Found: 313.1052.

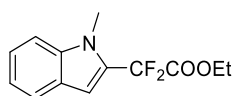

**Ethyl 2,2-difluoro-2-(1-methyl-1H-indol-2-yl)acetate (7e).** This compound is known.<sup>14</sup> The product (34 mg, 45% yield) was purified with silica gel chromatography (Petroleum ether/Ethyl acetate = 50:1) as colorless liquid.  $^1\text{H}$  NMR (400 MHz,  $\text{CDCl}_3$ )  $\delta$  7.65 (d,  $J = 8.0$  Hz, 1H), 7.39-7.32 (m, 2H), 7.19-7.14 (m, 1H), 6.81 (m, 1H), 4.40 (q,  $J = 7.2$  Hz, 2H), 3.89 (s, 3H), 1.38 (t,  $J = 7.2$  Hz, 3H).  $^{19}\text{F}$  NMR (376 MHz,  $\text{CDCl}_3$ )  $\delta$  -98.4 (s, 2F).  $^{13}\text{C}$  NMR (101 MHz,  $\text{CDCl}_3$ )  $\delta$  163.2 (t,  $J = 34.3$  Hz), 138.8, 129.4 (t,  $J = 28.7$  Hz), 126.0, 124.0, 121.9, 120.4, 111.2 (t,  $J = 249.8$  Hz), 109.7, 104.7 (t,  $J = 6.3$  Hz), 63.5, 31.2, 13.9.

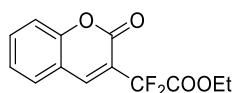

**Ethyl 2,2-difluoro-2-(2-oxo-2H-chromen-3-yl)acetate (7f).** This compound is known.<sup>15</sup> The product (54 mg, 67% yield) was purified with silica gel chromatography (Petroleum ether/Ethyl acetate = 10:1) as a white solid.  $^1\text{H}$  NMR (400 MHz,  $\text{CDCl}_3$ )  $\delta$  8.17 (s, 1H), 7.68-7.60 (m, 2H), 7.37 (t,  $J = 8.0$  Hz, 2H), 4.38 (q,  $J = 7.2$  Hz, 2H), 1.34 (t,  $J = 7.2$  Hz, 3H).  $^{19}\text{F}$  NMR (376 MHz,  $\text{CDCl}_3$ )  $\delta$  -106.2 (s, 2F).  $^{13}\text{C}$  NMR (101 MHz,

CDCl<sub>3</sub>)  $\delta$  162.2 (t,  $J = 32.9$  Hz), 157.9 (t,  $J = 4.4$  Hz), 154.1, 141.9 (t,  $J = 7.0$  Hz), 133.7, 129.2, 125.2, 121.1 (t,  $J = 25.7$  Hz), 117.4, 116.9, 110.4 (t,  $J = 251.9$  Hz), 63.5, 13.8.

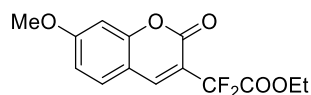

**Ethyl 2,2-difluoro-2-(7-methoxy-2-oxo-2H-chromen-3-yl)acetate (7g).** This compound is known.<sup>15</sup> The product (71 mg, 79% yield) was purified with silica gel chromatography (Petroleum ether/Ethyl acetate = 10:1) as a yellow solid. <sup>1</sup>H NMR (400 MHz, CDCl<sub>3</sub>)  $\delta$  8.09 (s, 1H), 7.50 (d,  $J = 8.8$  Hz, 1H), 6.91 (dd,  $J = 8.8$  Hz, 2.4 Hz, 1H), 6.83 (d,  $J = 2.0$  Hz, 1H), 4.37 (q,  $J = 7.2$  Hz, 2H), 3.89 (s, 3H), 1.33 (t,  $J = 7.2$  Hz, 3H). <sup>19</sup>F NMR (376 MHz, CDCl<sub>3</sub>)  $\delta$  -105.6 (s, 2F). <sup>13</sup>C NMR (101 MHz, CDCl<sub>3</sub>)  $\delta$  164.3, 162.4 (t,  $J = 33.1$  Hz), 158.3 (t,  $J = 4.6$  Hz), 156.2, 141.9 (t,  $J = 6.9$  Hz), 130.2, 117.2 (t,  $J = 26.0$  Hz), 113.5, 111.0, 110.7 (t,  $J = 251.3$  Hz), 100.7, 63.4, 55.9, 13.8.

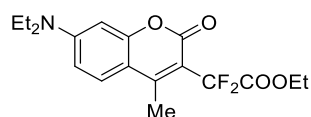

**Ethyl 2-(7-(diethylamino)-4-methyl-2-oxo-2H-chromen-3-yl)-2,2-difluoroacetate (7h).** This compound is known.<sup>16</sup> The product (100 mg, 95% yield) was purified with silica gel chromatography (Petroleum ether/Ethyl acetate = 10:1) as a yellow solid. <sup>1</sup>H NMR (400 MHz, CDCl<sub>3</sub>)  $\delta$  7.54 (d,  $J = 9.2$  Hz, 1H), 6.62 (dd,  $J = 9.2$  Hz, 2.4 Hz, 1H), 6.39 (m, 1H), 4.36 (q,  $J = 7.2$  Hz, 2H), 3.40 (q,  $J = 7.2$  Hz, 4H), 2.59 (s, 3H), 1.33 (t,  $J = 7.2$  Hz, 3H), 1.19 (t,  $J = 7.2$  Hz, 6H). <sup>19</sup>F NMR (376 MHz, CDCl<sub>3</sub>)  $\delta$  -95.3 (s, 2F). <sup>13</sup>C NMR (101 MHz, CDCl<sub>3</sub>)  $\delta$  163.4 (t,  $J = 32.6$  Hz), 159.8 (t,  $J = 5.9$  Hz), 155.6, 155.5, 151.6, 126.8, 113.5 (t,  $J = 249.7$  Hz), 110.6, 109.2, 108.5, 96.7, 62.8, 44.7, 14.8 (t,  $J = 5.9$  Hz), 13.7, 12.3.

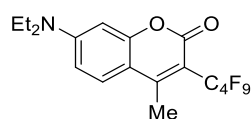

**7-(diethylamino)-4-methyl-3-(perfluorobutyl)-2H-chromen-2-one (7i).** The product (111 mg, 82% yield) was purified with silica gel chromatography (Petroleum

ether/Ethyl acetate = 15:1) as a yellow solid.  $^1\text{H}$  NMR (400 MHz,  $\text{CDCl}_3$ )  $\delta$  7.56 (d,  $J$  = 9.6 Hz, 1H), 6.62 (dd,  $J$  = 9.2 Hz, 2.4 Hz, 1H), 6.43 (d,  $J$  = 2.8 Hz, 1H), 3.43 (q,  $J$  = 7.2 Hz, 4H), 2.52 (t,  $J$  = 2.6 Hz, 3H), 1.21 (t,  $J$  = 7.2 Hz, 6H).  $^{19}\text{F}$  NMR (376 MHz,  $\text{CDCl}_3$ )  $\delta$  -80.9 (m, 3F), 102.2 (t,  $J$  = 13.0 Hz, 2F), 121.5 (m, 2F), 126.1 (m, 2F).  $^{13}\text{C}$  NMR (101 MHz,  $\text{CDCl}_3$ )  $\delta$  157.4 (m), 156.0, 152.1, 127.2, 109.2, 108.3, 108.0-99.0 (m), 96.6, 44.9, 15.9, 12.4. MS (ESI,  $m/z$ ): 472 (100,  $\text{M}+\text{Na}^+$ ), 450 (100,  $\text{M}+\text{H}^+$ ). HRMS (ESI,  $m/z$ ): ( $\text{M}+\text{H}$ ) $^+$  Calculated for  $\text{C}_{18}\text{H}_{17}\text{F}_9\text{NO}_2$ : 450.1109; Found: 450.1110.

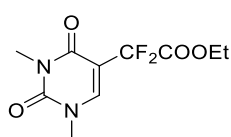

**Ethyl 2-(1,3-dimethyl-2,4-dioxo-1,2,3,4-tetrahydropyrimidin-5-yl)-2,2-difluoroacetate (7j).** This compound is known.<sup>16</sup> The product (77 mg, 98% yield) was purified with silica gel chromatography (Petroleum ether/Ethyl acetate = 1:1) as a white solid.  $^1\text{H}$  NMR (400 MHz,  $\text{CDCl}_3$ )  $\delta$  7.66 (s, 1H), 4.34 (q,  $J$  = 7.2 Hz, 2H), 3.47 (s, 3H), 3.29 (s, 3H), 1.32 (t,  $J$  = 7.2 Hz, 3H).  $^{19}\text{F}$  NMR (376 MHz,  $\text{CDCl}_3$ )  $\delta$  -112.1 (s, 2F).  $^{13}\text{C}$  NMR (101 MHz,  $\text{CDCl}_3$ )  $\delta$  162.6 (t,  $J$  = 33.3 Hz), 160.2 (t,  $J$  = 4.2 Hz), 151.0, 142.7 (dt,  $J$  = 8.3 Hz, 3.5 Hz), 111.0 (t,  $J$  = 250.5 Hz), 106.7 (t,  $J$  = 25.3 Hz), 63.3, 37.6, 27.7, 13.7.

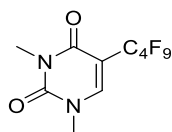

**1,3-Dimethyl-5-(perfluorobutyl)pyrimidine-2,4(1H,3H)-dione (7k).** This compound is known.<sup>17</sup> The product (58 mg, 54% yield) was purified with silica gel chromatography (Petroleum ether/Ethyl acetate = 3:1) as colorless liquid.  $^1\text{H}$  NMR (400 MHz,  $\text{CDCl}_3$ )  $\delta$  7.59 (s, 1H), 3.51 (s, 3H), 3.36 (s, 3H).  $^{19}\text{F}$  NMR (376 MHz,  $\text{CDCl}_3$ )  $\delta$  -81.0 (m, 3F), 110.0 (t,  $J$  = 13.5 Hz, 2F), 122.0 (m, 2F), 126.0 (m, 2F).  $^{13}\text{C}$  NMR (101 MHz,  $\text{CDCl}_3$ )  $\delta$  158.4 (t,  $J$  = 2.2 Hz), 150.8, 145.7 (t,  $J$  = 10.1 Hz), 110.0-104.0 (m), 102.1, 37.9, 28.1.

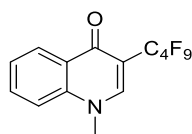

**1-Methyl-3-(perfluorobutyl)quinolin-4(1H)-one (7l).** The product (47 mg, 42% yield) was purified with silica gel chromatography (Petroleum ether/Ethyl acetate = 10:1) as colorless liquid.  $^1\text{H}$  NMR (400 MHz,  $\text{CDCl}_3$ )  $\delta$  8.47 (dd,  $J = 8.0$  Hz, 1.2 Hz, 1H), 7.82 (s, 1H), 7.77-7.71 (m, 1H), 7.50-7.43 (m, 2H), 3.90 (s, 3H).  $^{19}\text{F}$  NMR (376 MHz,  $\text{CDCl}_3$ )  $\delta$  -81.0 (t,  $J = 10.0$  Hz, 3F), 109.9 (t,  $J = 13.5$  Hz, 2F), 122.0 (m, 2F), 125.9 (m, 2F).  $^{13}\text{C}$  NMR (101 MHz,  $\text{CDCl}_3$ )  $\delta$  173.7, 144.8 (t,  $J = 11.1$  Hz), 140.0, 133.2, 127.8, 127.4, 125.3, 115.6, 110.0-104 (m), 41.5. MS (ESI,  $m/z$ ): 400, 379, 378 (100,  $\text{M}+\text{H}^+$ ). HRMS (ESI,  $m/z$ ): ( $\text{M}+\text{H}^+$ )<sup>+</sup> Calculated for  $\text{C}_{14}\text{H}_9\text{F}_9\text{NO}$ : 378.0534; Found: 378.0535.

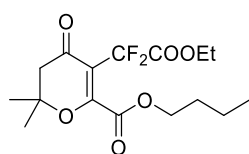

**Butyl 5-(2-ethoxy-1,1-difluoro-2-oxoethyl)-2,2-dimethyl-4-oxo-3,4-dihydro-2H-pyran-6-carboxylate (7o).** This compound is known.<sup>16</sup> The product (56 mg, 54% yield) was purified with silica gel chromatography (Petroleum ether/Ethyl acetate = 10:1) as colorless liquid.  $^1\text{H}$  NMR (400 MHz,  $\text{CDCl}_3$ )  $\delta$  4.31 (q,  $J = 7.2$  Hz, 2H), 4.27 (t,  $J = 6.6$  Hz, 2H), 2.61 (s, 2H), 1.72-1.64 (m, 2H), 1.52 (s, 6H), 1.45-1.35 (m, 2H), 1.30 (t,  $J = 7.2$  Hz, 3H), 0.93 (t,  $J = 7.2$  Hz, 3H).  $^{19}\text{F}$  NMR (376 MHz,  $\text{CDCl}_3$ )  $\delta$  -102.5 (s, 2F).  $^{13}\text{C}$  NMR (101 MHz,  $\text{CDCl}_3$ )  $\delta$  189.4 (t,  $J = 3.3$  Hz), 162.6 (t,  $J = 33.3$  Hz), 161.7 (t,  $J = 3.4$  Hz), 161.5, 111.1 (t,  $J = 251.3$  Hz), 108.5 (t,  $J = 23.0$  Hz), 84.9, 66.8, 63.0, 46.7, 30.1, 25.6, 18.8, 13.8, 13.5.

#### 4. References:

- [1] F-H. Xiao, F-H. Wu, Y-J. Shen, L-F. Zhou, *J. Fluorine Chem.*, **2005**, *126*, 63.
- [2] W-L. Deng, Y-J. Li, Y-G. Li, H-L. Bao, *Synthesis*, **2018**, *50*, 2974.
- [3] R. Beniazza, L. Remisse, D. Jardel, D. Lastécouères, J-M. Vincent, *Chem. Commun.*, **2018**, *54*, 7451.
- [4] R. Zeng, C. Fu, S. Ma, *Angew. Chem. Int. Ed.*, **2012**, *51*, 3888.
- [5] L. Cao, C. Li, *Tetrahedron Lett.*, **2008**, *49*, 7380.
- [6] I. Behrends, S. Bähr, C. Czekelius, C. Czekelius, *Chem. Eur. J.*, **2016**, *22*, 17177.
- [7] L. Helmecke, M. Spittler, K. Baumgarten, C. Czekelius, *Org. Lett.*, **2019**, *21*, 7823.
- [8] R. Beniazza, M. Douarre, D. Lastécouères, J. M. Vincent, *Chem. Commun.*, **2017**, *53*, 3547.
- [9] T. Xu, C.-W. Cheung, X. Hu, *Angew. Chem. Int. Ed.*, **2014**, *53*, 4910.
- [10] J.-J. Zhong, C. Yang, X.-Y. Chang, C. Zou, W. Lu, C. -M. Che, *Chem. Commun.*, **2017**, *53*, 8948.
- [11] J-L. Li, W. Wan, G-B. Ma, Y-R. Chen, Q-Y. Hu, K. Kang, H-Z. Jiang, J. Hao, *Eur. J. Org. Chem.*, **2016**, *28*, 4916.
- [12] M-C. Belhomme, T. Poisson, X. Pannecoucke, *J. Org. Chem.*, **2014**, *79*, 7205.
- [13] J. Jung, E. Kim, Y. You, E-J. Cho, *Adv. Synth. Catal.*, **2014**, *356*, 2741.
- [14] V. Soni, D-M. Sharma, B. Punji, *Chem. Asian J.*, **2018**, *13*, 2516.
- [15] D. Song, C-M. Wang, Z-P. Ye, G-J. Xia, Z-X. Deng, J-A. Xiao, H-Y. Xiang, H. Yang, *J. Org. Chem.*, **2019**, *84*, 7480.
- [16] C-Y. He, J-J. Kong, X-F. Li, X-F. Li, Q-L. Yao, F-M. Yuan, *J. Org. Chem.*, **2017**, *82*, 910.
- [17] B-H. Zhang, J-J. Kong, Y. Huang, Y-G. Lou, X-F. Li, C-Y. He, *Chin. Chem. Lett.*, **2017**, *28*, 1751.

## 5. Mechanism studies.

### 5.1 Addition of radical and SET inhibitors:

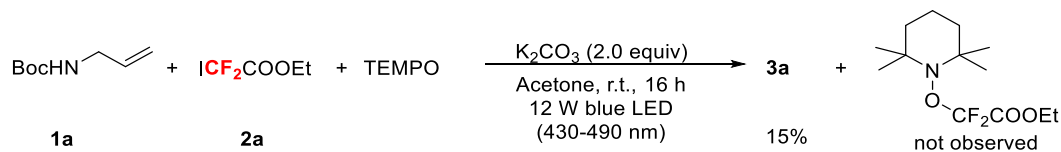

When the radical scavenger TEMPO (2,2,6,6-tetramethyl-1-piperidinyloxy, 1.0 equivalent) was added under standard conditions, only 15% of the product **3a** was observed.

### 5.2 Radical clock experiments.

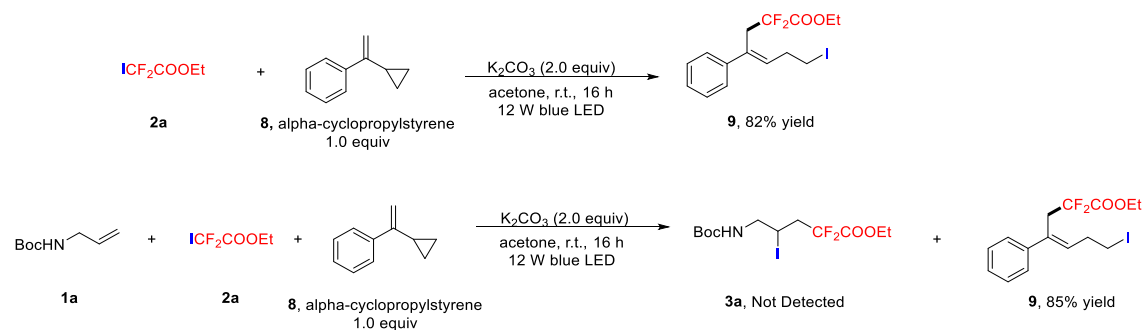

**Typical procedure:** To a 25 mL of Schlenk tube equipped with a Teflon septum were added **1a** (0.3 mmol, 1.0 equiv) (or without **1a**),  $K_2CO_3$  (0.6 mmol, 2.0 equiv) under Ar, followed by Acetone (2 mL) with stirring,  $ICF_2COOEt$  (**2a**) (0.45 mmol, 1.5 equiv) and alpha-cyclopropylstyrene (**8**) (0.3 mmol, 1.0 equiv) were added subsequently. After stirring for 16 h, the reaction mixture was diluted with Ethyl acetate, washed with brine, dried over anhydrous  $Na_2SO_4$ , filtered and concentrated. The residue was purified with silica gel chromatography to provide pure product.

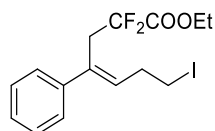

**Ethyl (E)-2,2-difluoro-7-iodo-4-phenylhept-4-enoate (9).** The product (100 mg, 85% yield) was purified with silica gel chromatography (Petroleum ether/Ethyl acetate = 50:1) as colorless liquid.  $^1H$  NMR (400 MHz,  $CDCl_3$ )  $\delta$  7.37-7.23 (m, 5H), 5.84 (t,  $J$  = 7.2 Hz, 1H), 3.89 (q,  $J$  = 7.2 Hz, 2H), 3.33 (t,  $J$  = 15.6 Hz, 2H), 3.23 (t,  $J$  = 7.0 Hz, 2H),

2.85 (q,  $J = 7.2$  Hz, 2H), 1.14 (t,  $J = 7.2$  Hz, 3H).  $^{19}\text{F}$  NMR (376 MHz,  $\text{CDCl}_3$ )  $\delta$  -106.2 – -106.3 (m, 2F).  $^{13}\text{C}$  NMR (101 MHz,  $\text{CDCl}_3$ )  $\delta$  163.6 (t,  $J = 32.6$  Hz), 141.6, 134.3, 132.1 (t,  $J = 4.2$  Hz), 128.2, 127.5, 126.7, 114.8 (t,  $J = 253.6$  Hz), 62.7, 35.7 (t,  $J = 24.6$  Hz), 32.9, 13.6, 4.29. MS (EI):  $m/z$  (%) 394 ( $\text{M}^+$ ), 267, 129 (100).

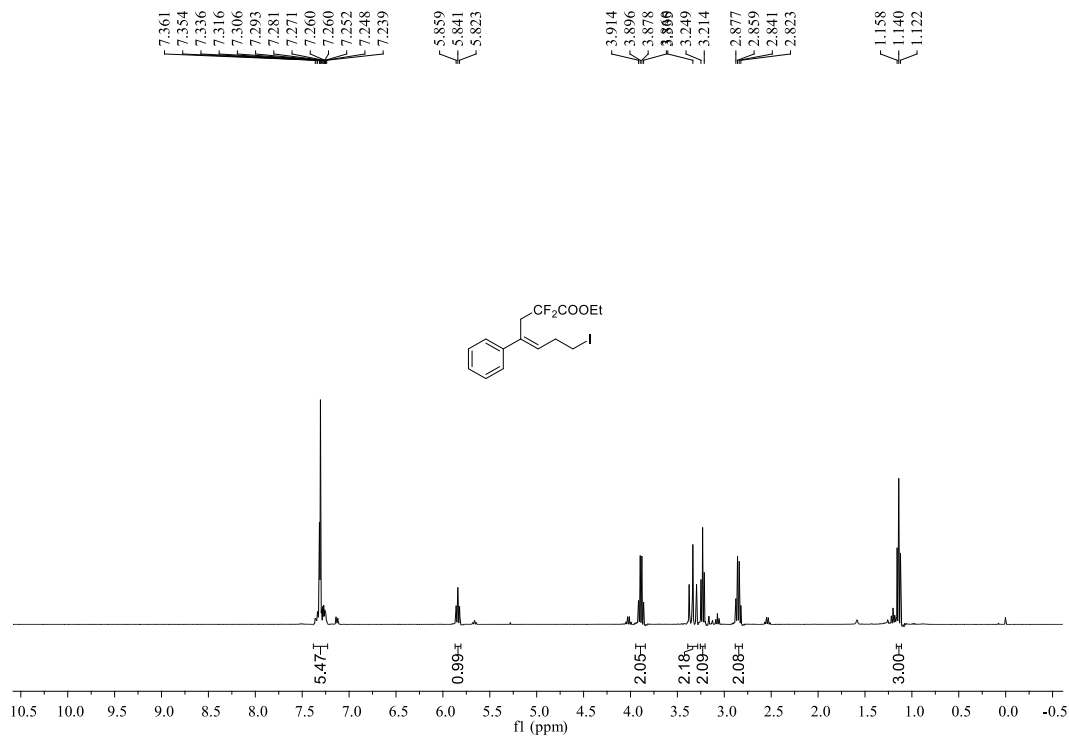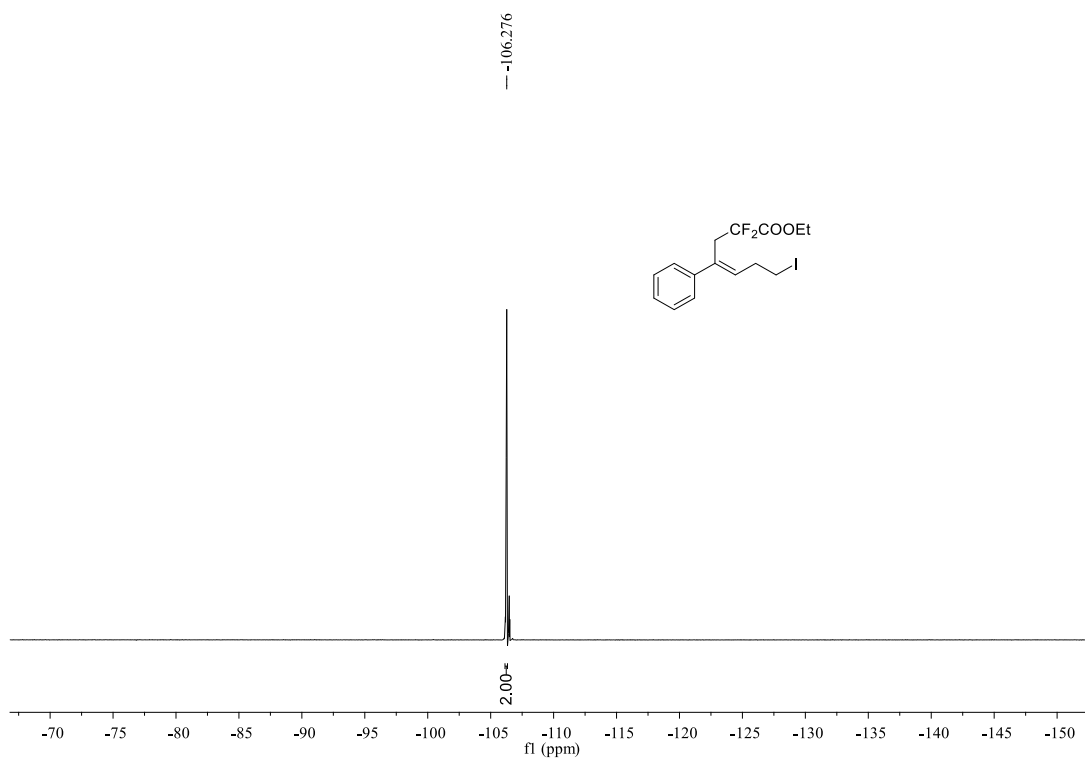

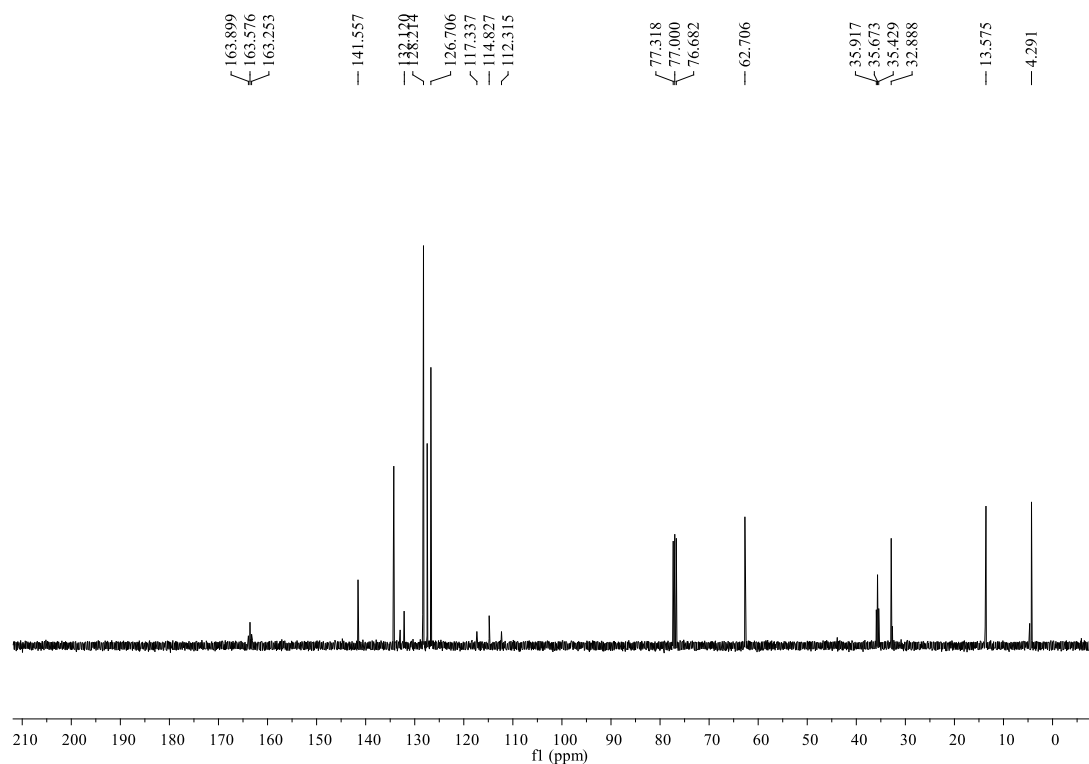

### 5.3 UV-vis spectroscopic measurement.

Solution 1: **2a** (60  $\mu$ L, 0.4 mmol), and  $K_2CO_3$  (70 mg, 0.5 mmol) were added in acetone (4.0 mL). The mixture was stirred for 20 minutes and filtered.

Solution 2: **2a** (60  $\mu$ L, 0.4 mmol) was added in acetone (4.0 mL). The mixture was stirred for 20 minutes and filtered.

Solution 3:  $K_2CO_3$  (70 mg, 0.5 mmol) was added in acetone (4.0 mL). The mixture was stirred for 20 minutes and filtered.

Solution 4: **2a** (60  $\mu$ L, 0.4 mmol) was added in cyclohexane (4.0 mL). The mixture was stirred for 20 minutes and filtered.

Performed on UV visible spectrophotometer, recorded in 1cm path quartz cuvettes using T6 Xinyue visible spectrophotometer (PERSEE<sup>TM</sup>), pure acetone as blank sample.

| A<br>$\lambda$ (nm) | <b>2a</b><br>+ $K_2CO_3$<br>+Acetone<br>A <sub>1</sub> | <b>2a</b><br>+Acetone<br>A <sub>2</sub> | $K_2CO_3$<br>+Acetone<br>A <sub>3</sub> | <b>2a</b><br>+Cyclohexane<br>A <sub>4</sub> |
|---------------------|--------------------------------------------------------|-----------------------------------------|-----------------------------------------|---------------------------------------------|
| 330                 | 2.537                                                  | 2.322                                   | 0.048                                   | 2.133                                       |
| 340                 | 3.332                                                  | 3.178                                   | 0.031                                   | 1.675                                       |
| 350                 | 3.428                                                  | 3.279                                   | 0.025                                   | 0.946                                       |



|     |       |       |       |       |
|-----|-------|-------|-------|-------|
| 360 | 3.806 | 3.422 | 0.023 | 0.472 |
| 370 | 3.222 | 3.183 | 0.021 | 0.237 |
| 380 | 3.234 | 3.181 | 0.02  | 0.11  |
| 390 | 3.169 | 2.995 | 0.02  | 0.051 |
| 400 | 2.343 | 2.225 | 0.018 | 0.028 |
| 410 | 2.072 | 1.685 | 0.014 | 0.018 |
| 420 | 1.518 | 1.206 | 0.013 | 0.018 |
| 430 | 1.069 | 0.855 | 0.01  | 0.029 |
| 440 | 0.784 | 0.63  | 0.008 | 0.051 |
| 450 | 0.576 | 0.461 | 0.006 | 0.087 |
| 460 | 0.404 | 0.324 | 0.006 | 0.147 |
| 470 | 0.28  | 0.225 | 0.006 | 0.222 |
| 480 | 0.179 | 0.145 | 0.006 | 0.328 |
| 490 | 0.119 | 0.096 | 0.006 | 0.436 |
| 500 | 0.082 | 0.067 | 0.006 | 0.541 |
| 510 | 0.06  | 0.051 | 0.006 | 0.618 |
| 520 | 0.051 | 0.043 | 0.006 | 0.653 |
| 530 | 0.047 | 0.039 | 0.006 | 0.639 |
| 540 | 0.043 | 0.036 | 0.006 | 0.584 |
| 550 | 0.042 | 0.034 | 0.006 | 0.499 |
| 560 | 0.036 | 0.03  | 0.006 | 0.399 |
| 570 | 0.032 | 0.026 | 0.006 | 0.305 |
| 580 | 0.027 | 0.022 | 0.006 | 0.219 |
| 590 | 0.023 | 0.019 | 0.006 | 0.157 |
| 600 | 0.018 | 0.016 | 0.006 | 0.108 |
| 610 | 0.014 | 0.012 | 0.006 | 0.078 |
| 620 | 0.012 | 0.01  | 0.006 | 0.057 |
| 630 | 0.008 | 0.008 | 0.006 | 0.046 |
| 640 | 0.007 | 0.007 | 0.006 | 0.041 |
| 650 | 0.006 | 0.006 | 0.006 | 0.037 |

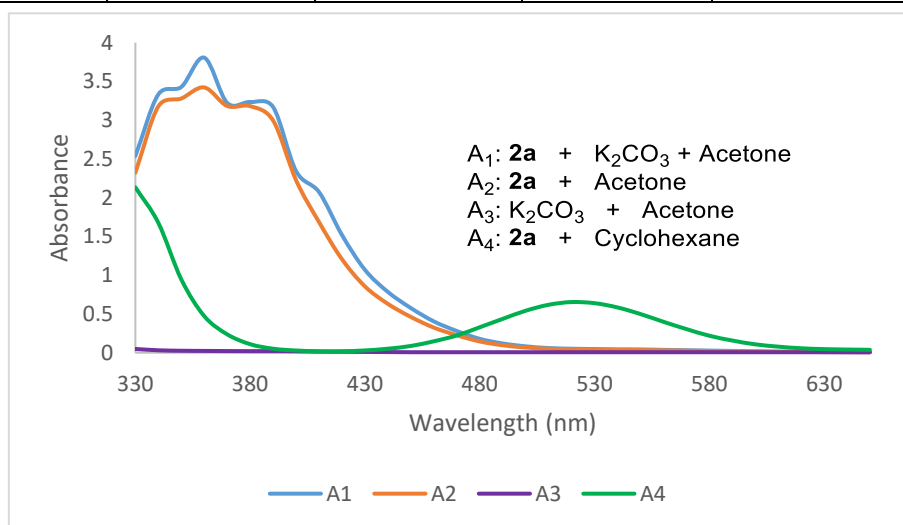

#### 5.4 Light/dark experiments.

six standard reaction mixtures in 25 mL flame-dried thick-walled glass pressure tube equipped with a stir bar was cooled under Ar atmosphere were charged with tert-Butyl N-allylcarbamate (47.2 mg, 0.30 mmol, 1.0 equiv.), ethyl difluoroiodoacetate (112.5 mg, 0.45 mmol, 1.5 equiv.), and  $K_2CO_3$  (82.9 mg, 0.6 mmol, 2.0 equiv.) and acetone (2.0 mL). The reaction mixtures were degassed by Argon sparging for 10 min, then irradiated with 12 W blue LEDs lamps. After 3 h, one tube was removed from the irradiation setup for analysis. The remaining five tubes were stirred in the absence of light for an additional 1.5 h. Then, one tube was removed for analysis, and the lamps were turned back on to irradiate the remaining four reaction mixtures. After an additional 1.5 h of irradiation, the lamps were turned off, and one tube was removed for analysis. The remaining threetubes were stirred in the absence of light for an additional 2 h. Then, a tube was removed for analysis, and the lamps were turned back on to irradiate the remaining two reaction mixtures. After 2 h, the lamp was turned off, and one tube was removed for analysis. The remaining one tube was stirred in the absence light for an additional 2 h. Then it was analyzed. The reaction mixtures were analyzed by  $^{19}F$  NMR with an internal standard.

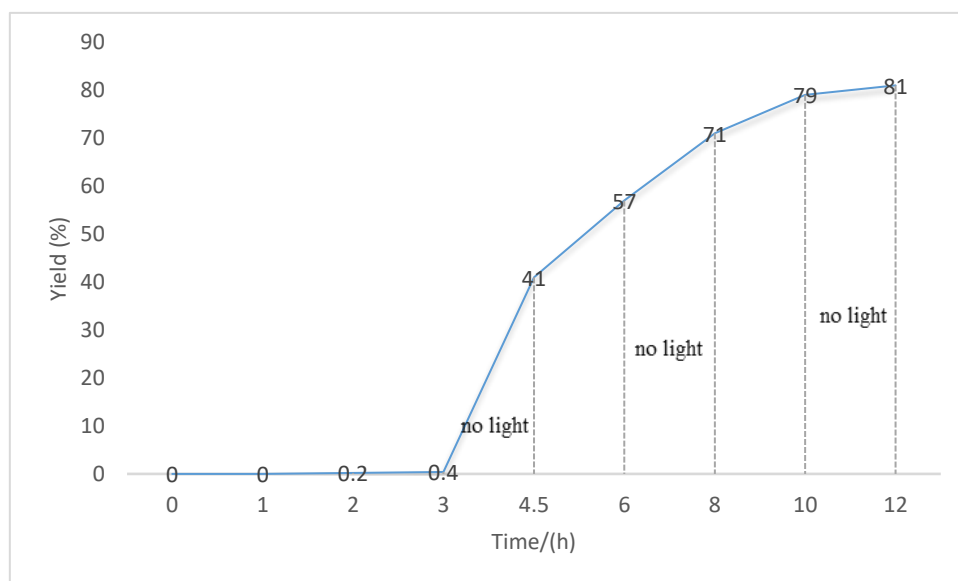

### 5.5 Stoichiometry of the Weak intermolecular interaction.

The stoichiometry of weak intermolecular interaction was calculated using the Job's plot method (P. Job, *Ann. Chim.*, **1928**, *9*, 113.). The Job's plot of weak intermolecular interaction between Acetone and ethyl difluoroiodoacetate (**2a**) was calculated measuring the absorption of cyclohexane solutions at 420 nm with different donor/acceptor ratios with constant concentration (0.12 M) of the two components. The absorbance values were plotted against the molar fraction (%) of **2a**. The Job's plot analysis of the weak intermolecular interaction between acetone and **2a** showed a maximal absorbance at 50-60% molar fraction of **2a**.

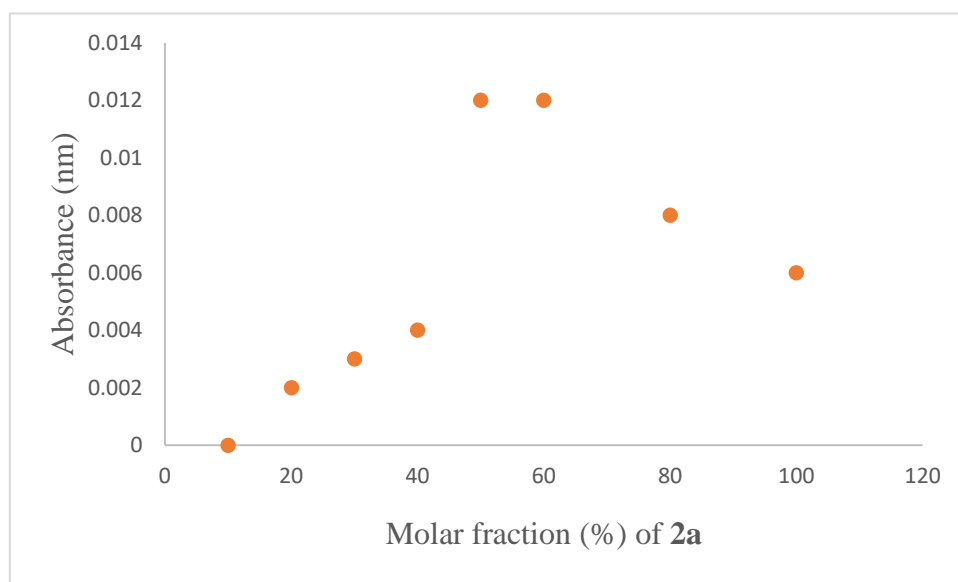

## 6. Copies of NMR spectra of 3, 5, 7.

### Ethyl 5-((*tert*-butoxycarbonyl)amino)-2,2-difluoro-4-iodopentanoate (3a).

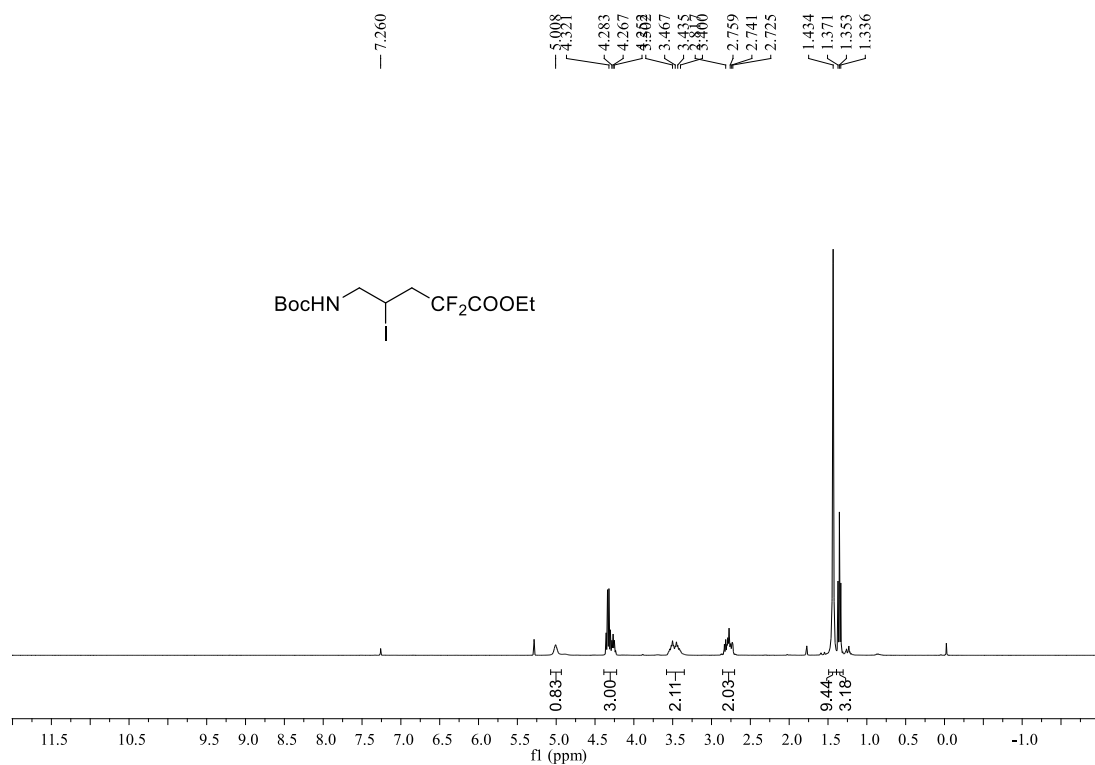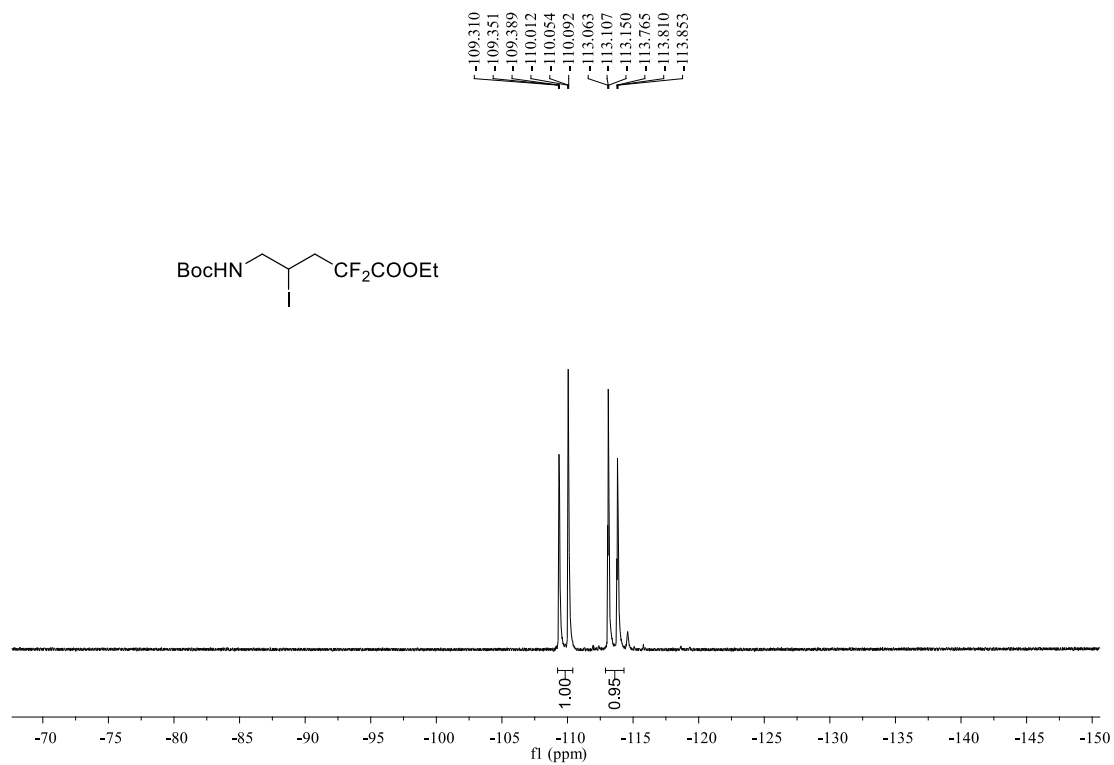

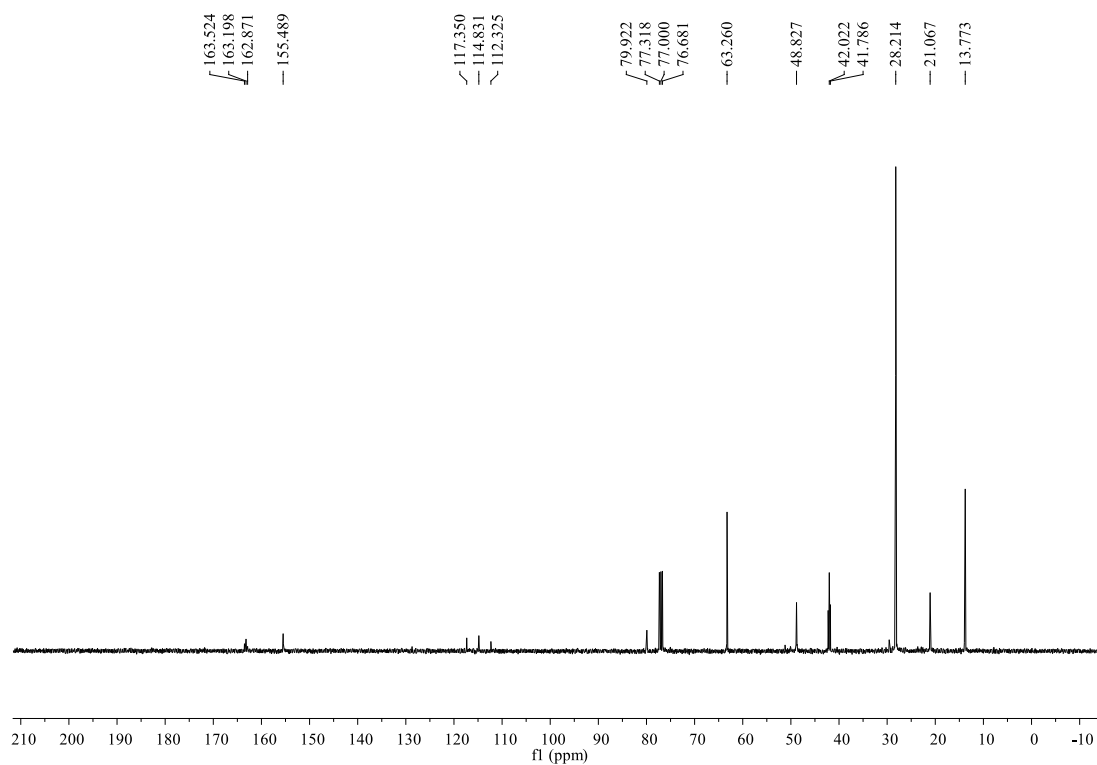

**Ethyl 2,2-difluoro-4-iododecanoate (3b).**

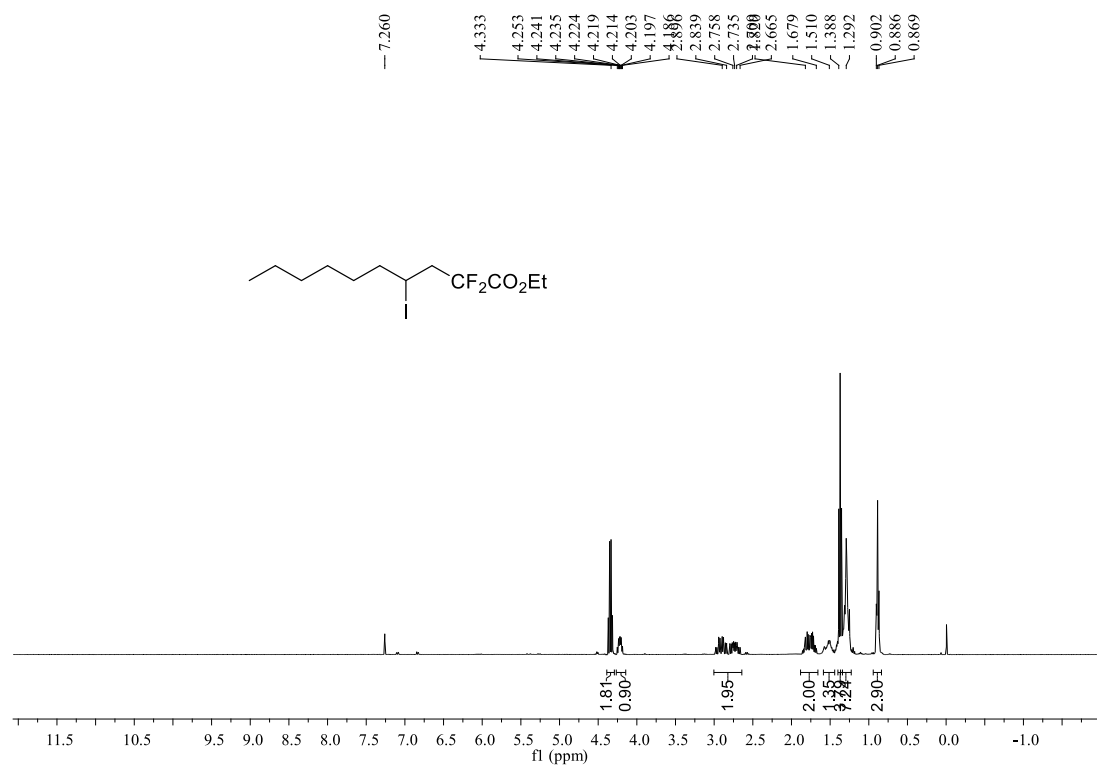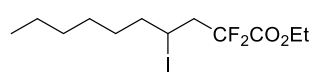

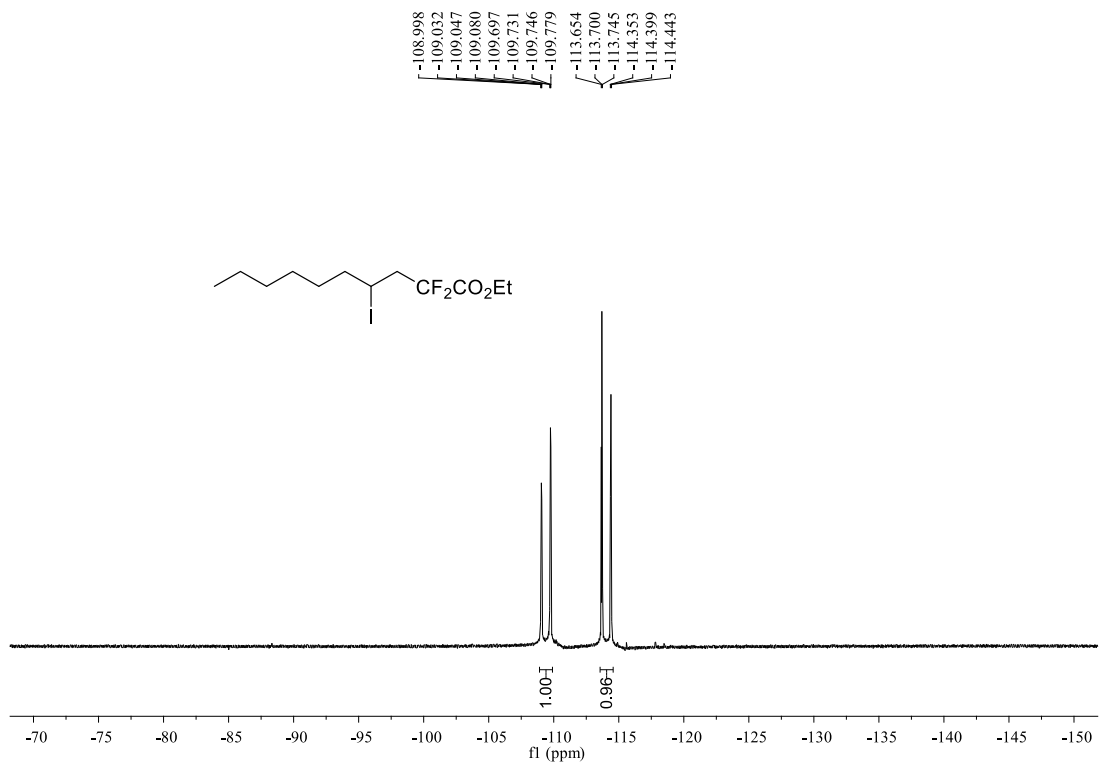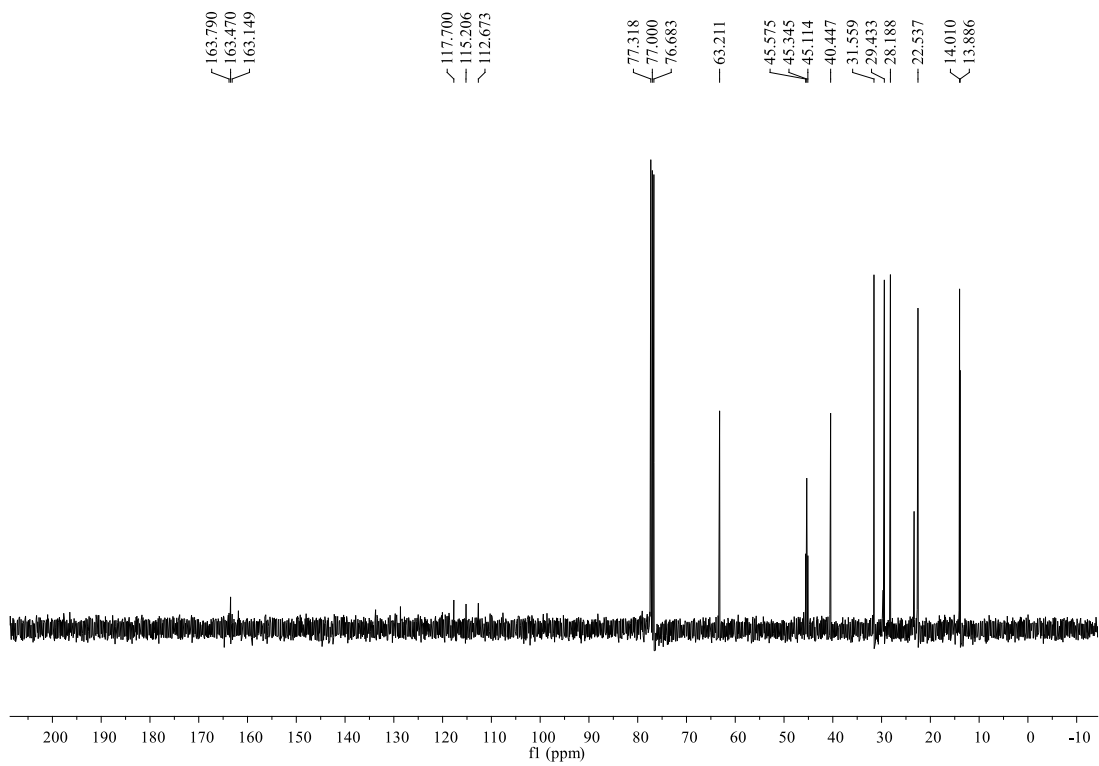

**Ethyl 5-acetoxy-2,2-difluoro-4-iodopentanoate (3c).**

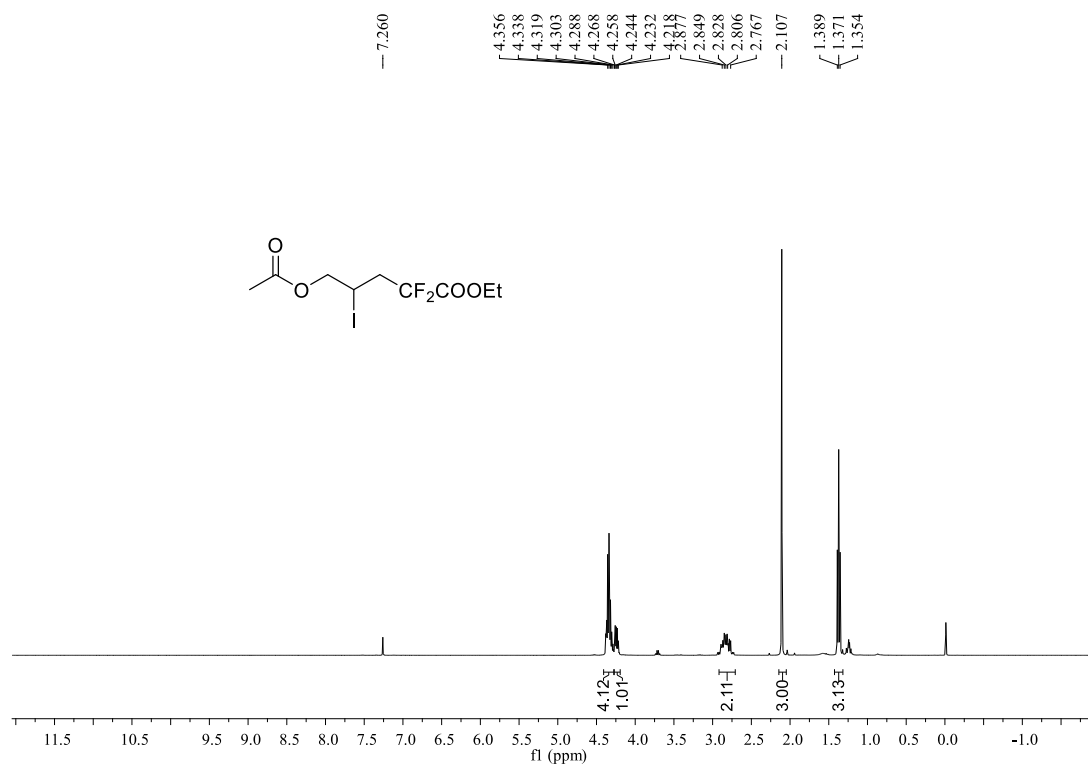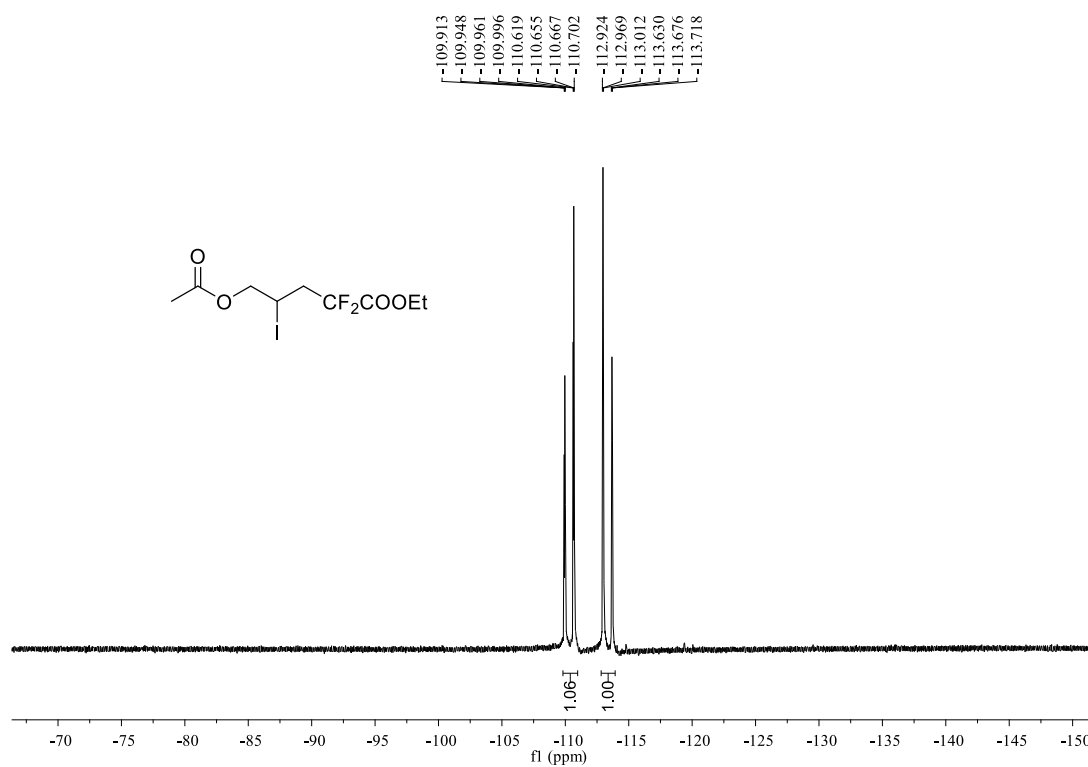

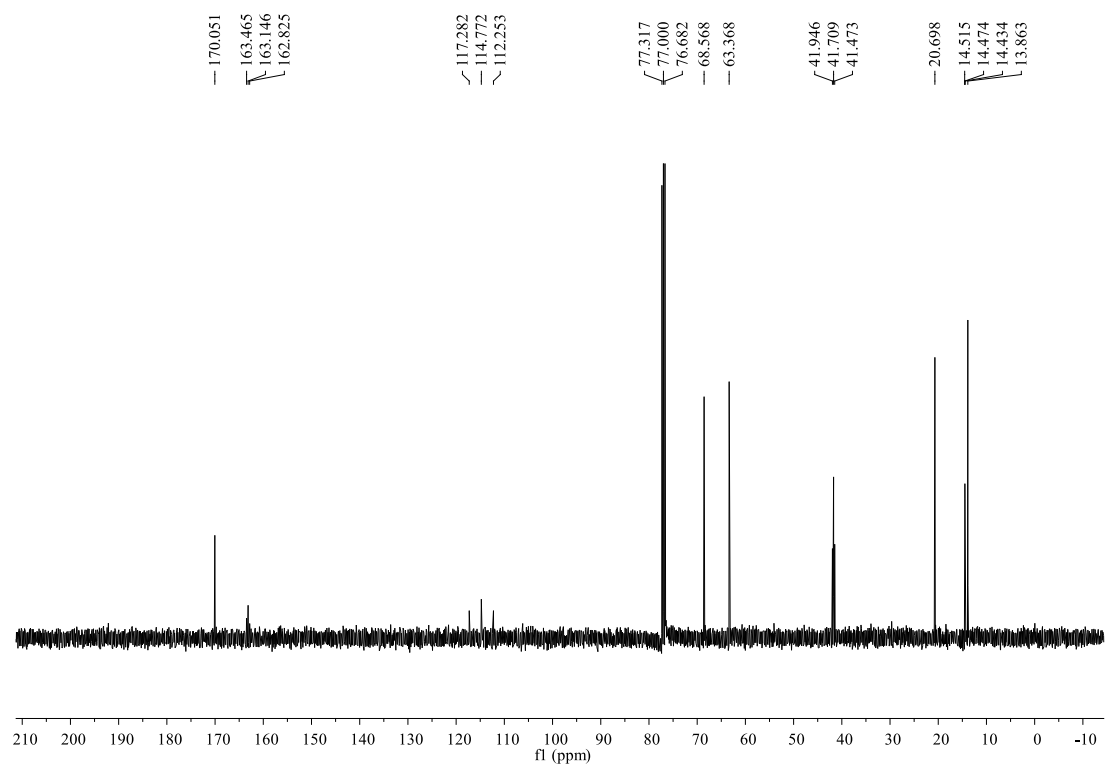

**Ethyl 4-cyclohexyl-2,2-difluoro-4-iodobutanoate (3d).**

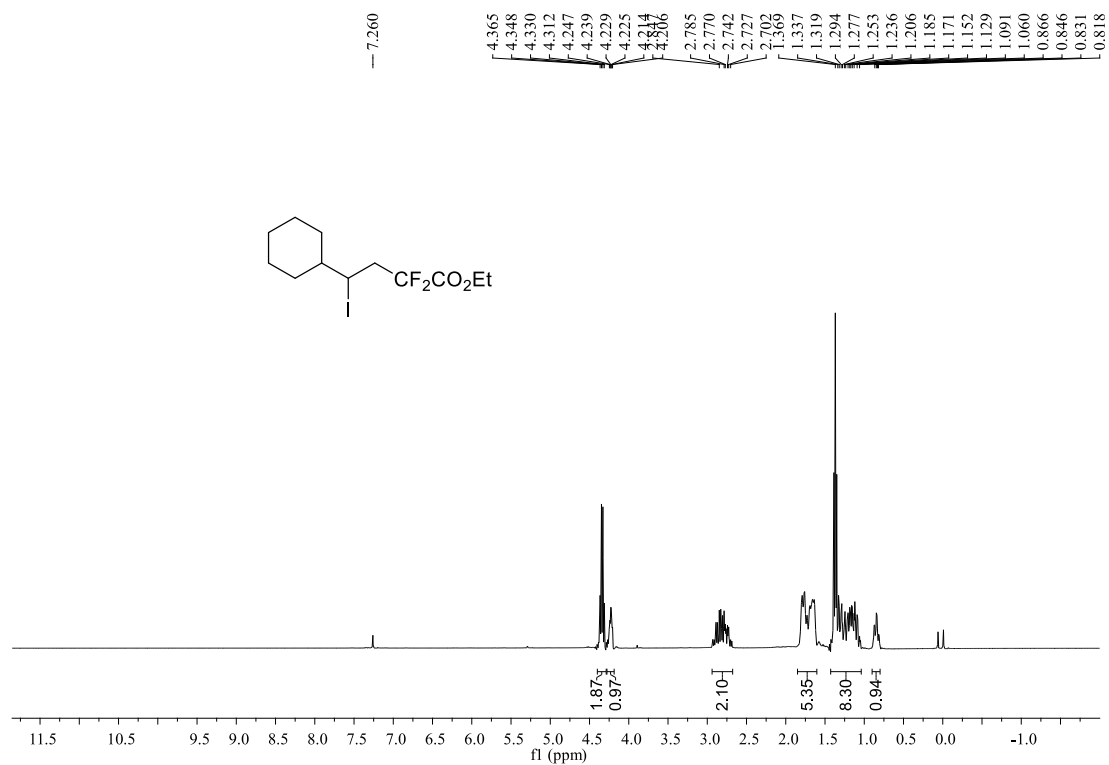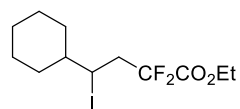



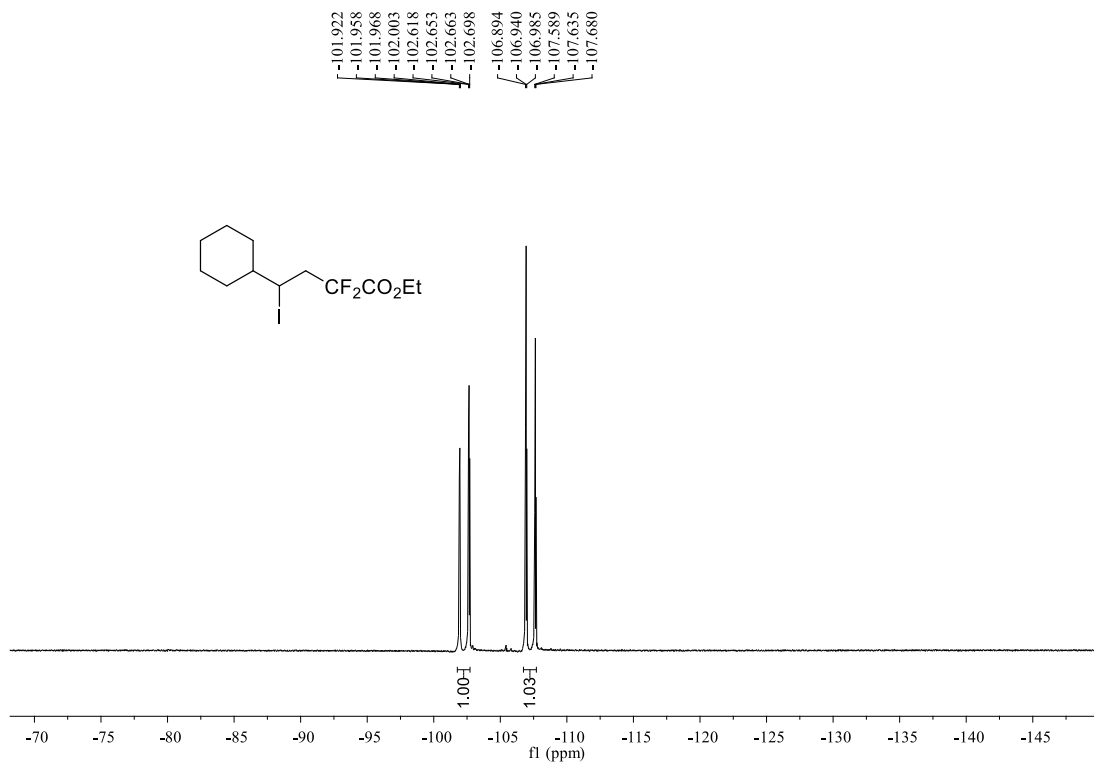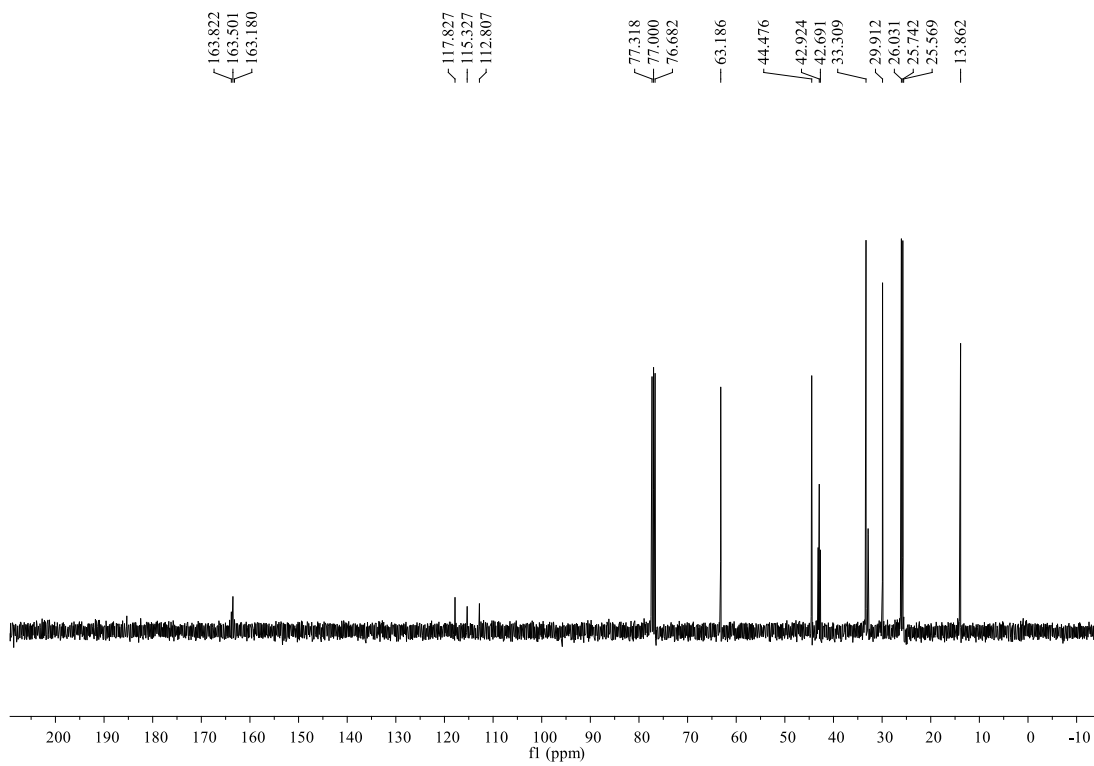

**Ethyl 2,2-difluoro-4-iodo-5-(naphthalen-1-yl)pentanoate (3e).**

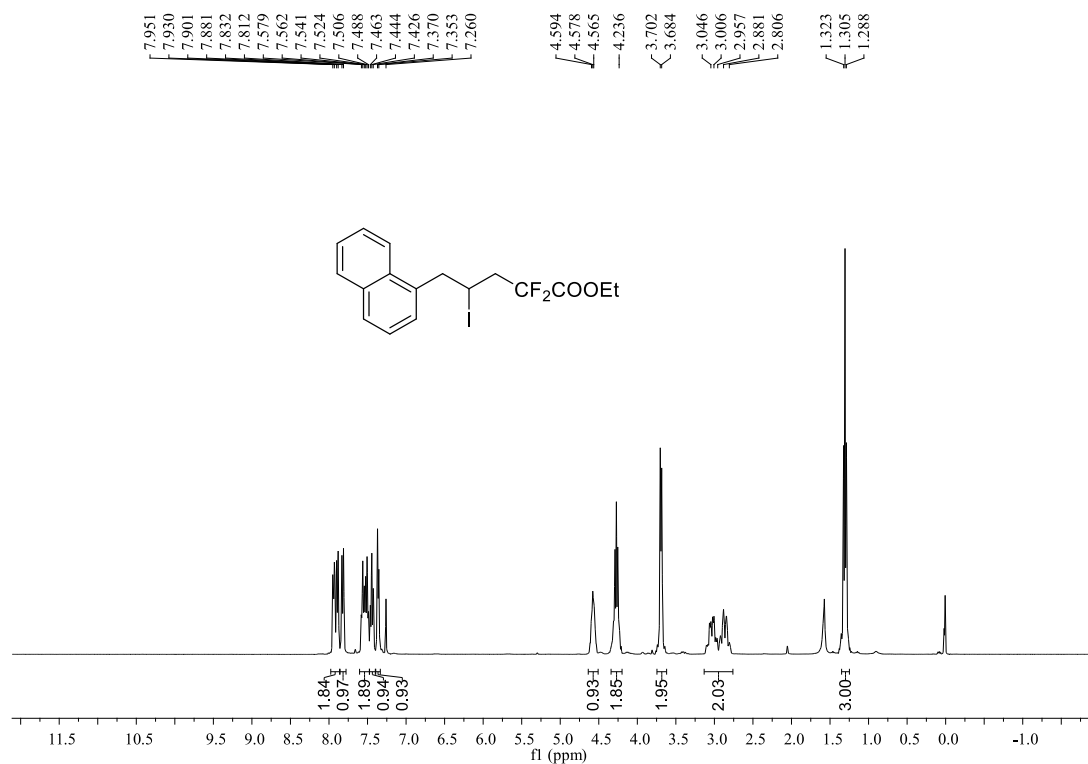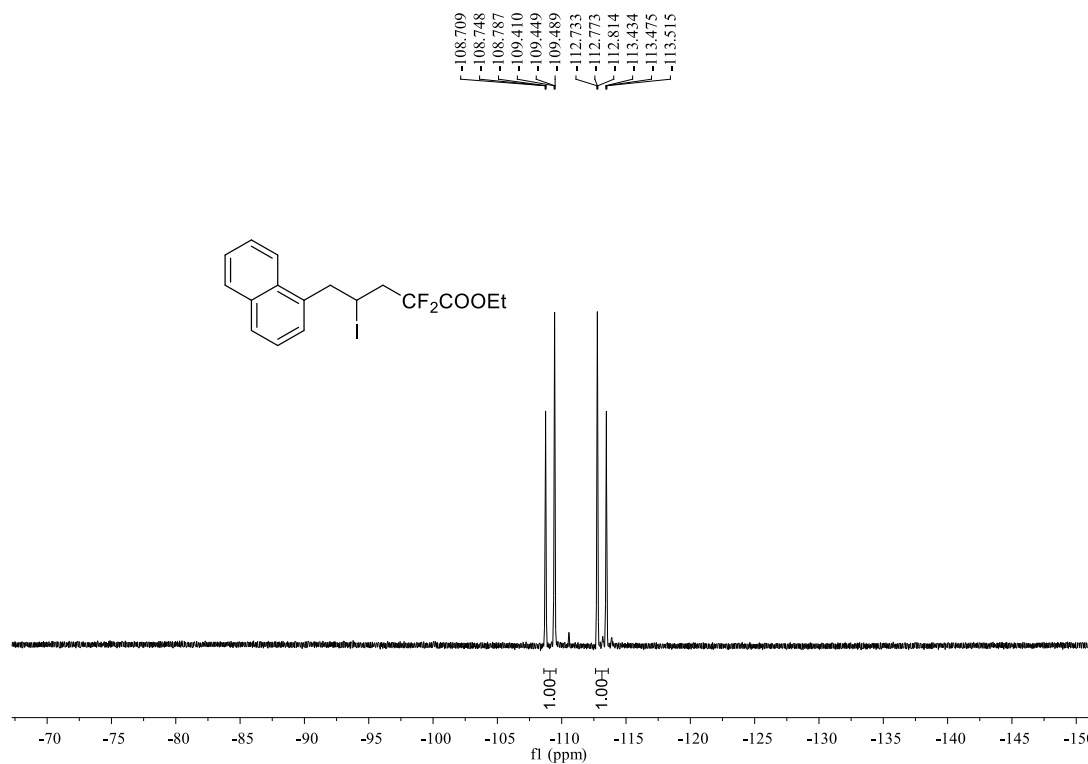

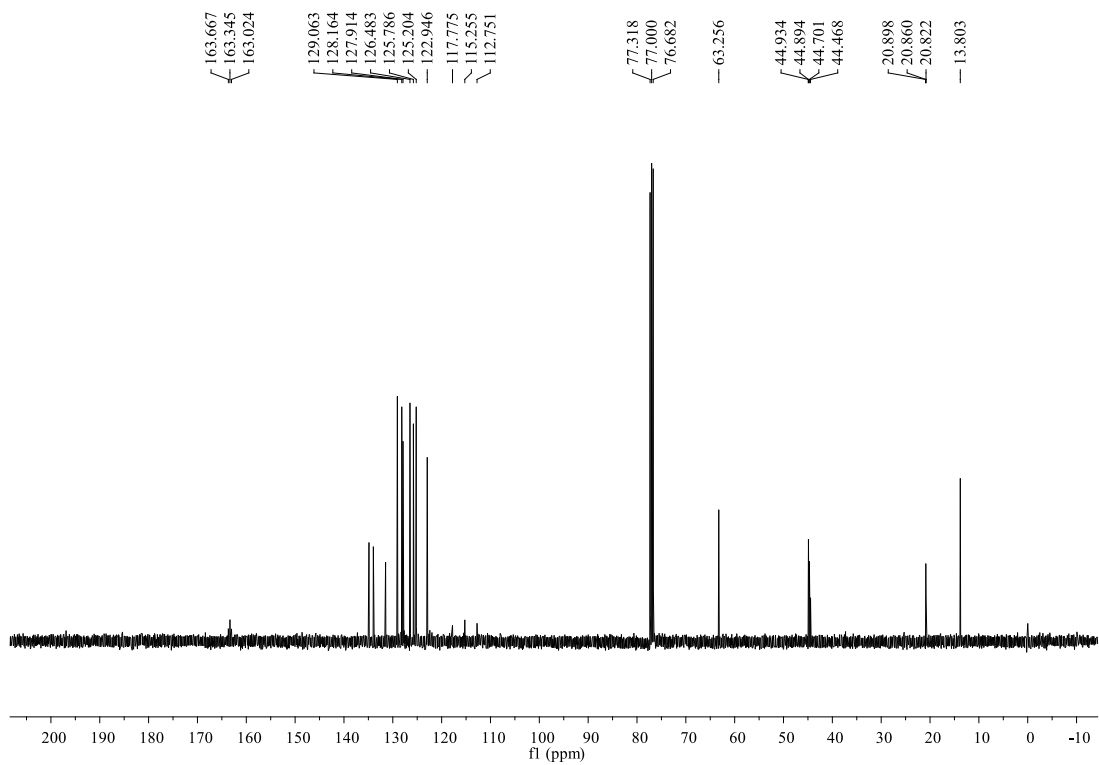

**Ethyl 2,2-difluoro-4-iodo-5-phenylpentanoate (3f).**

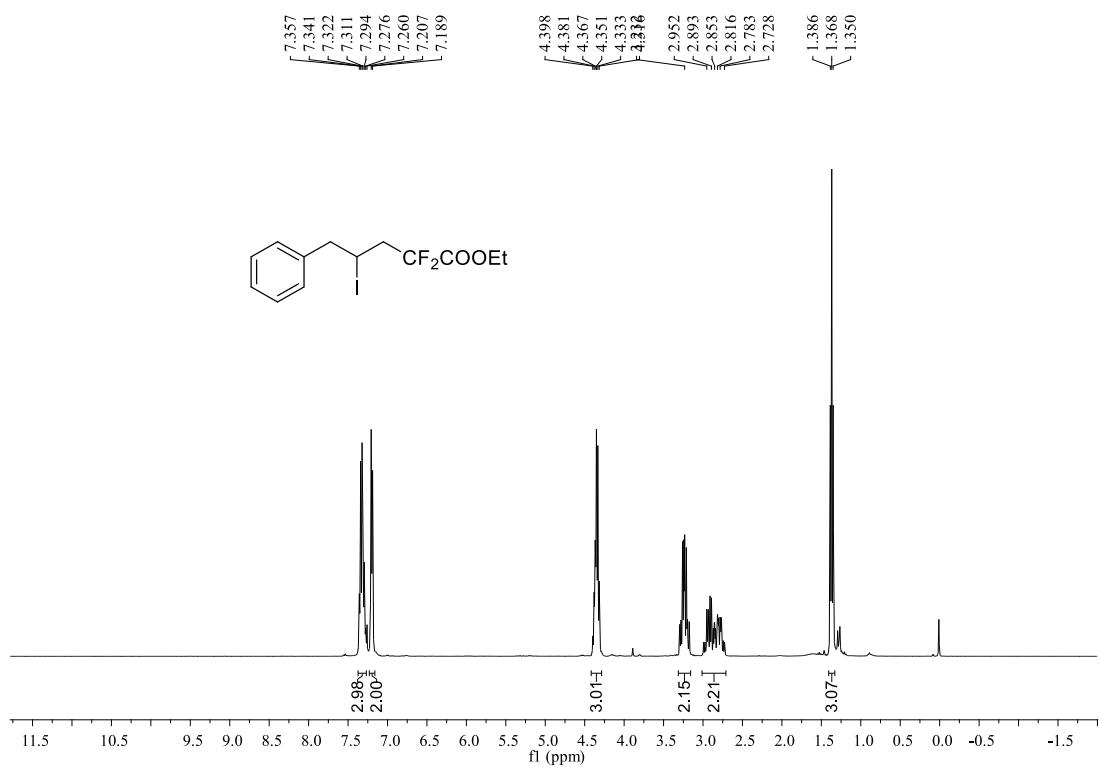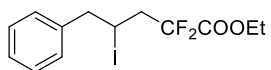

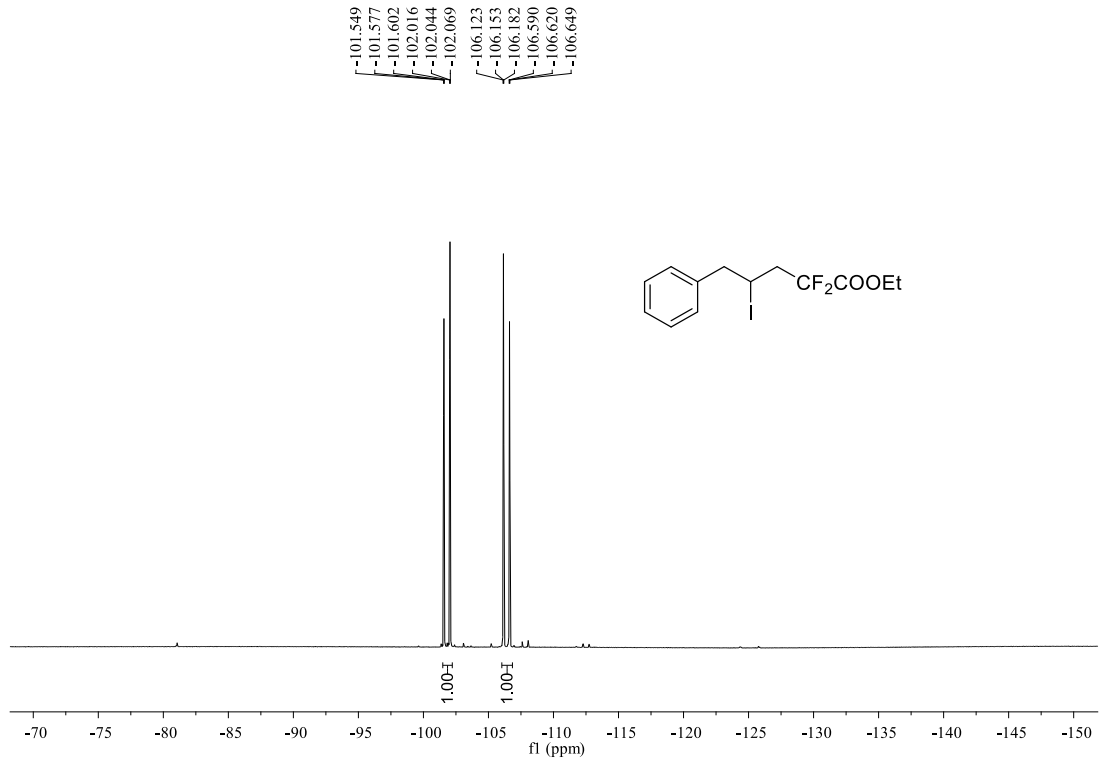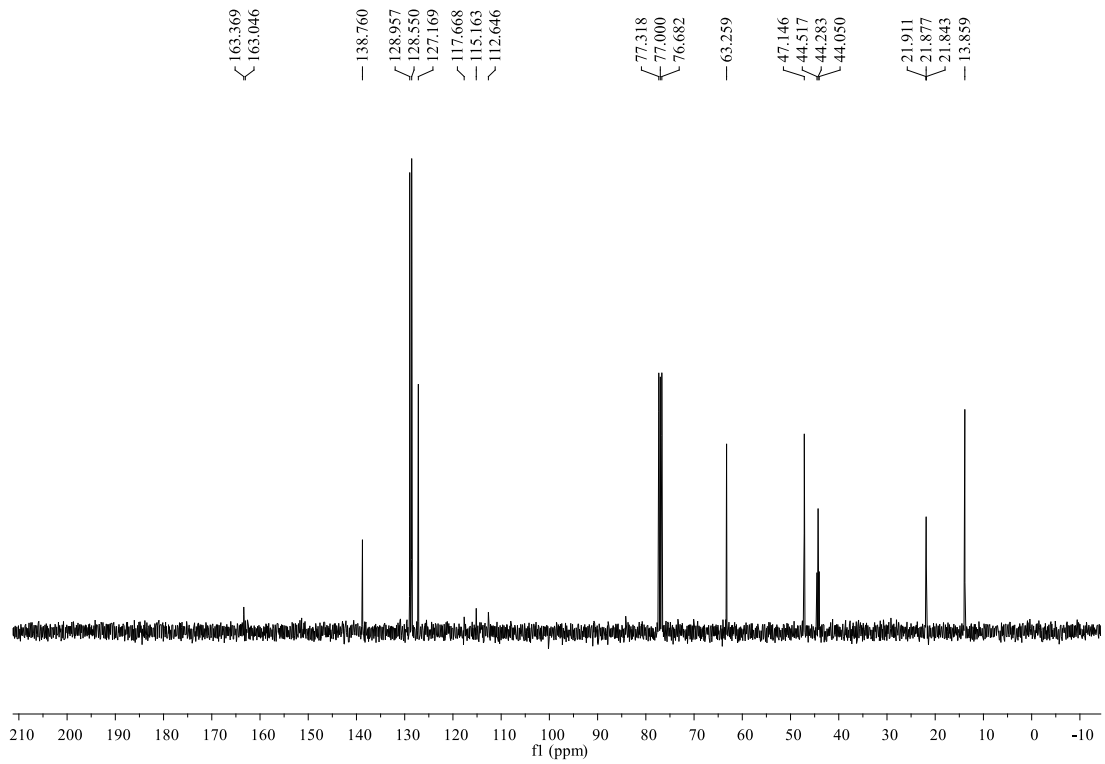

**Ethyl 2,2-difluoro-4-iodo-5-(4-methoxyphenyl)pentanoate (3g).**

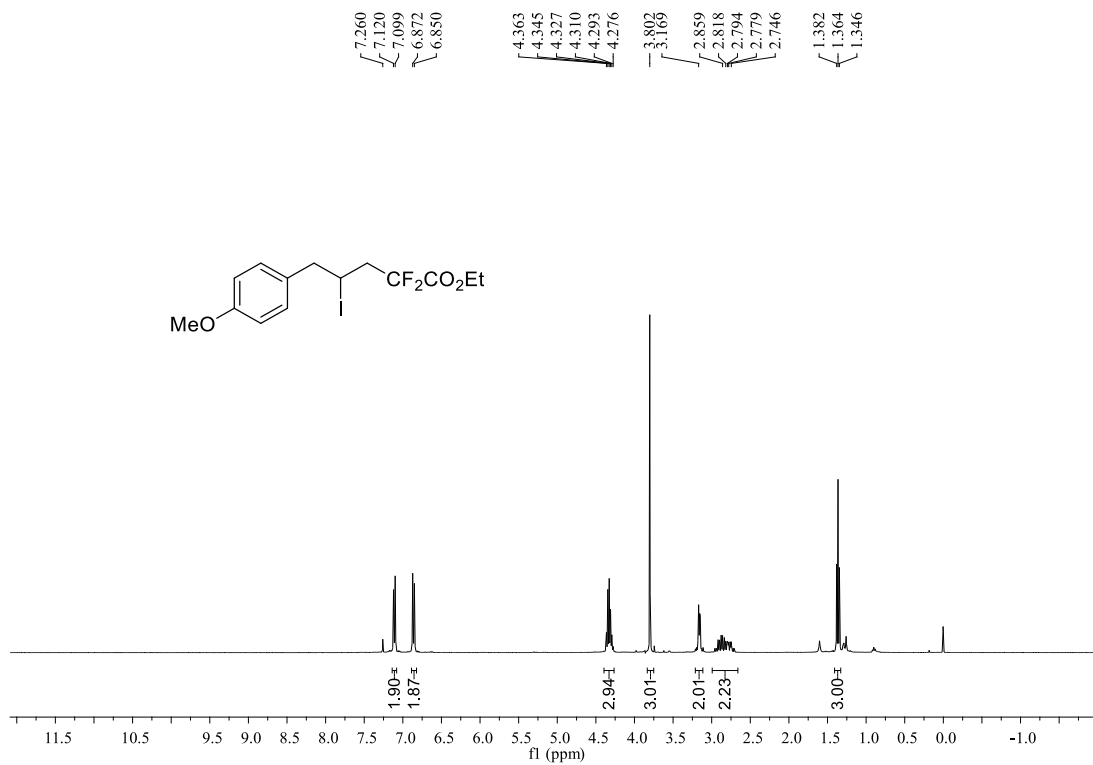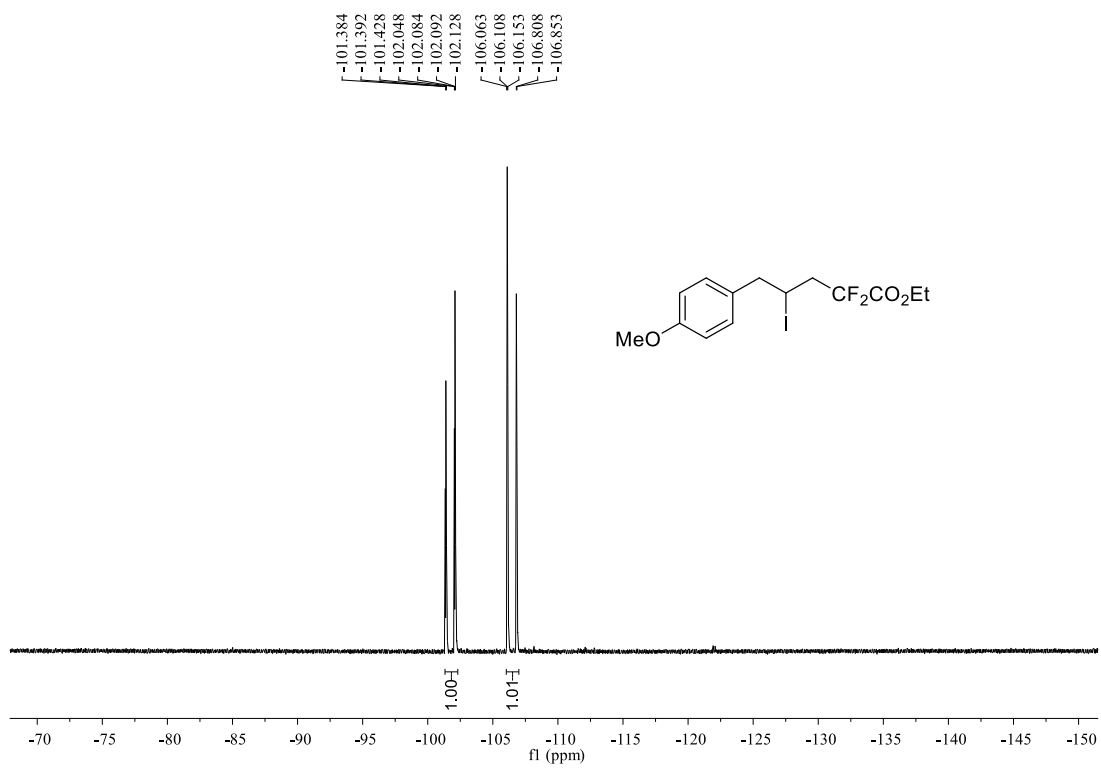

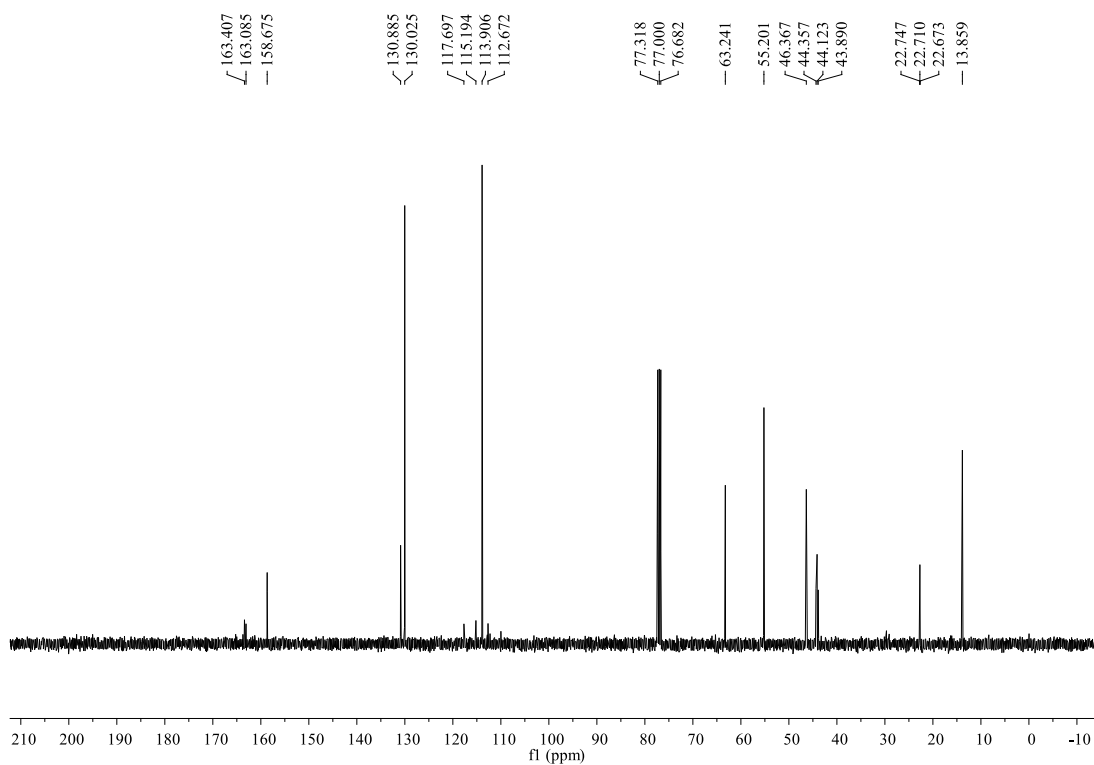

**Tert-butyl (4,4,5,5,6,6,7,7,7-nonafluoro-2-iodoheptyl)carbamate (3h).**

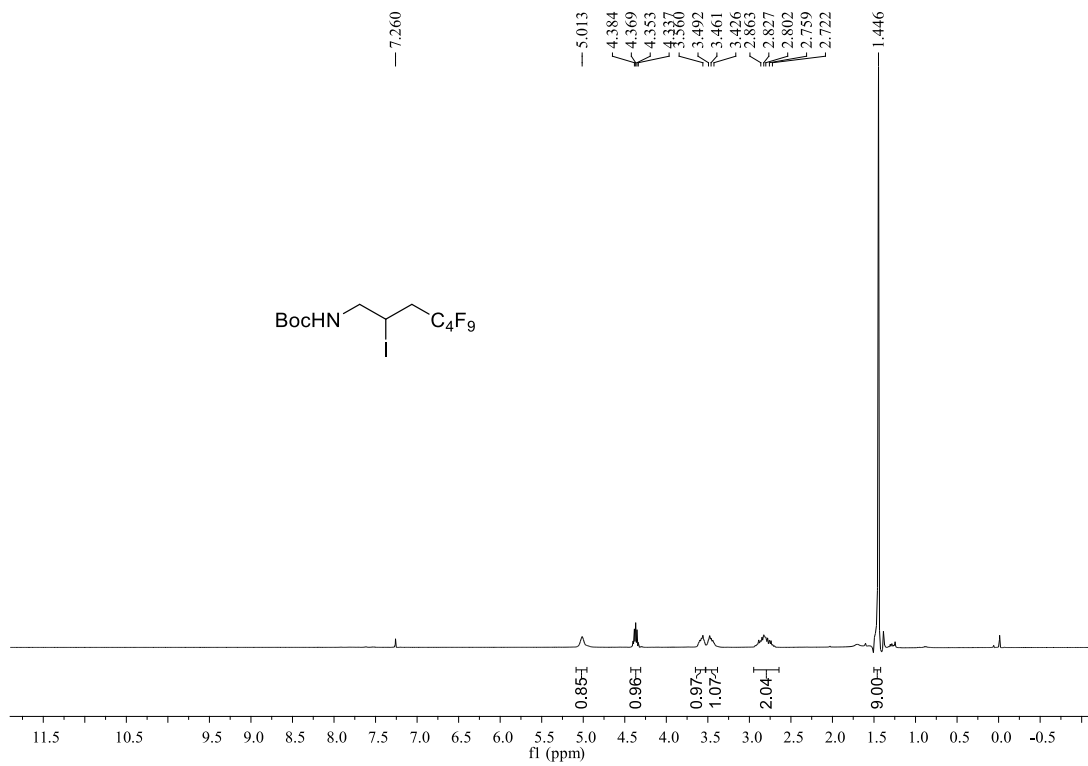

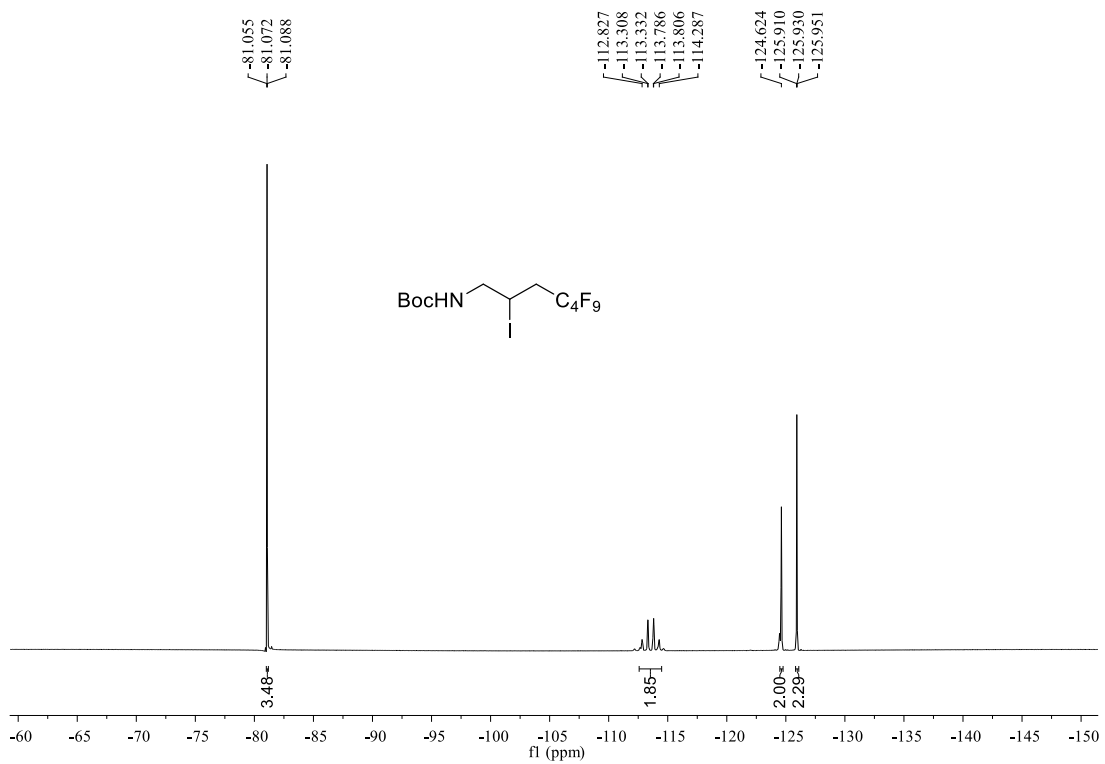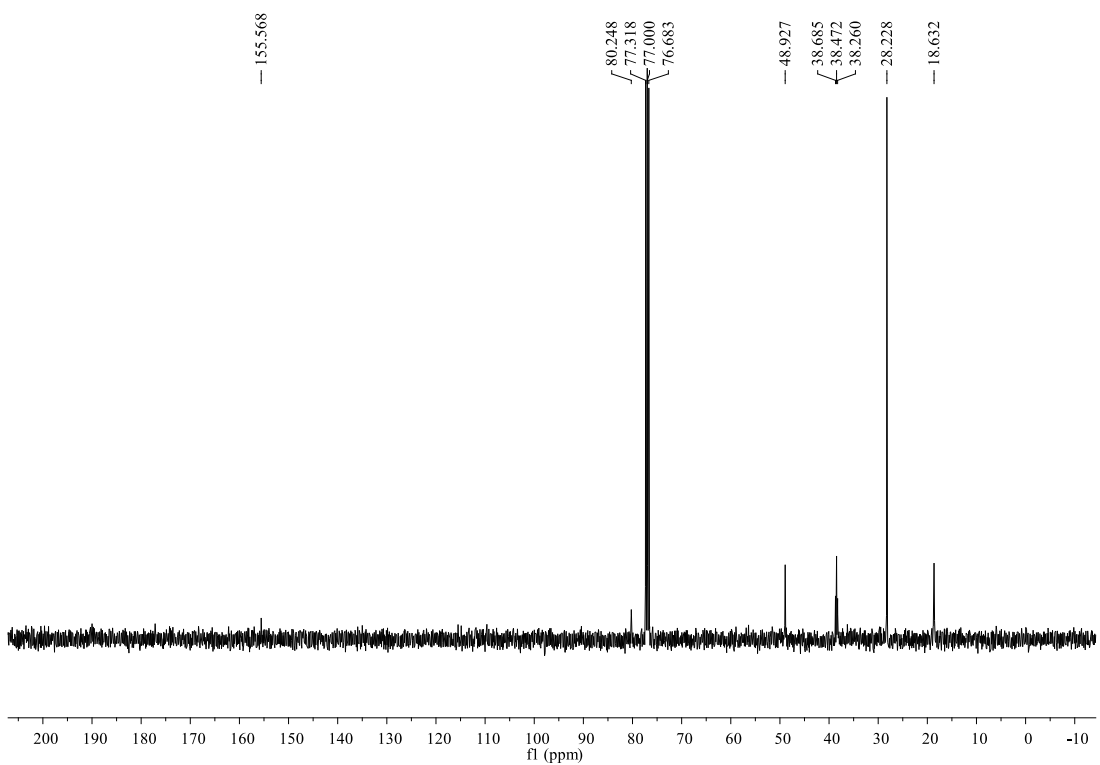

***Tert*-butyl (4,4,5,5,6,6,7,7,8,8,9,9,9-tridecafluoro-2-iodononyl)carbamate (3i).**

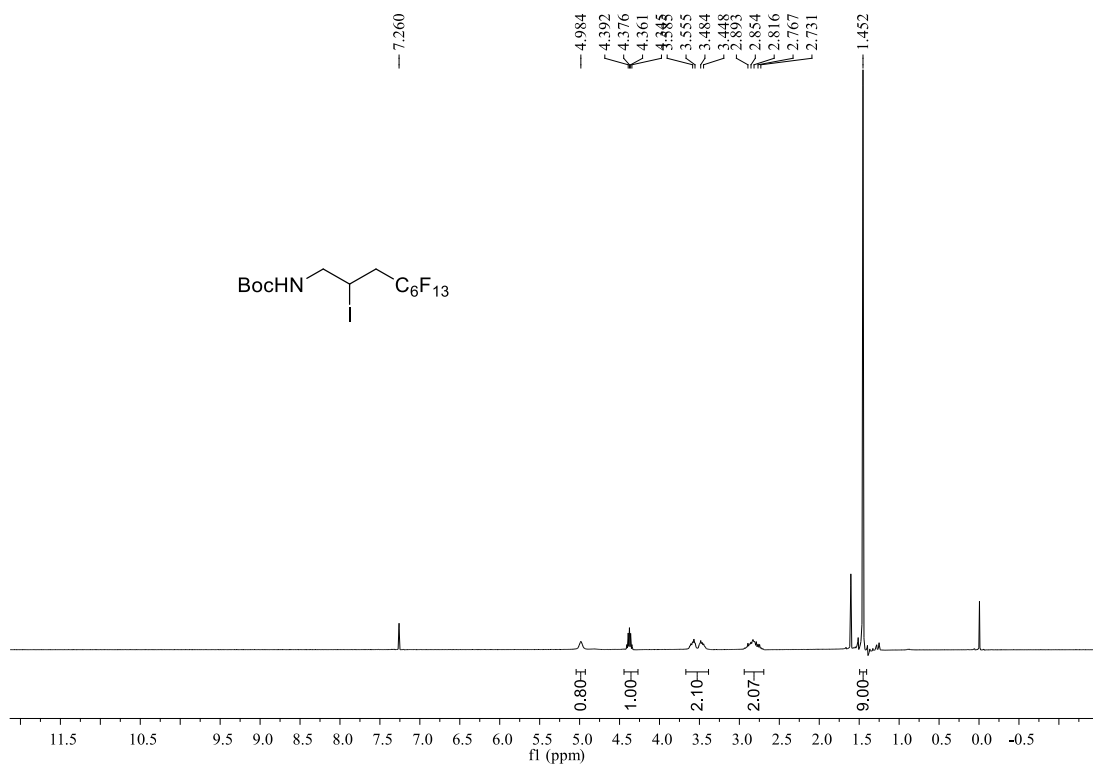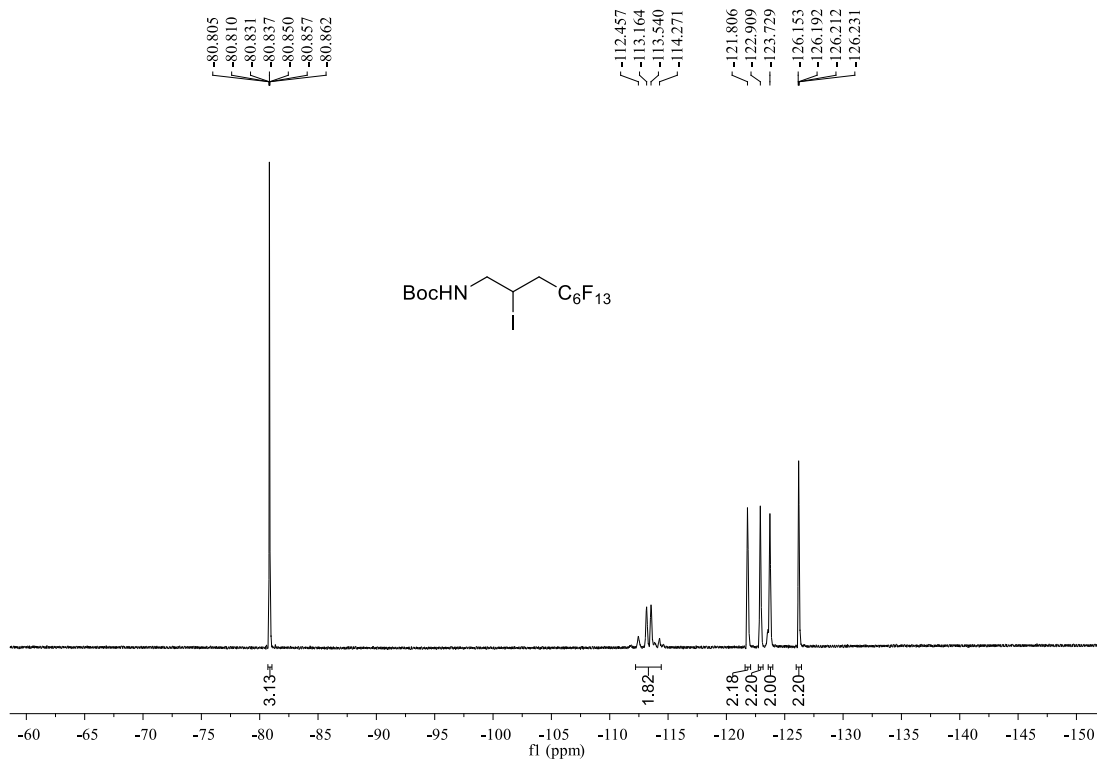



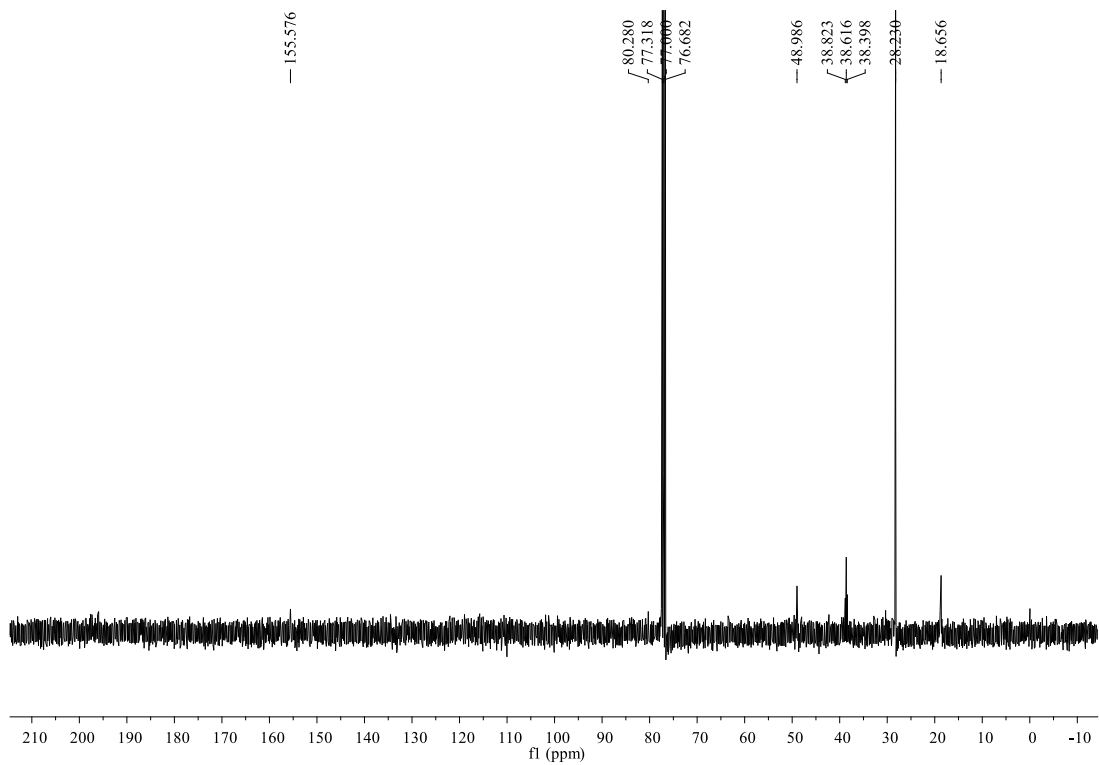

**1,1,1,2,2,3,3,4,4-nonafluoro-6-iodododecane (3j).**

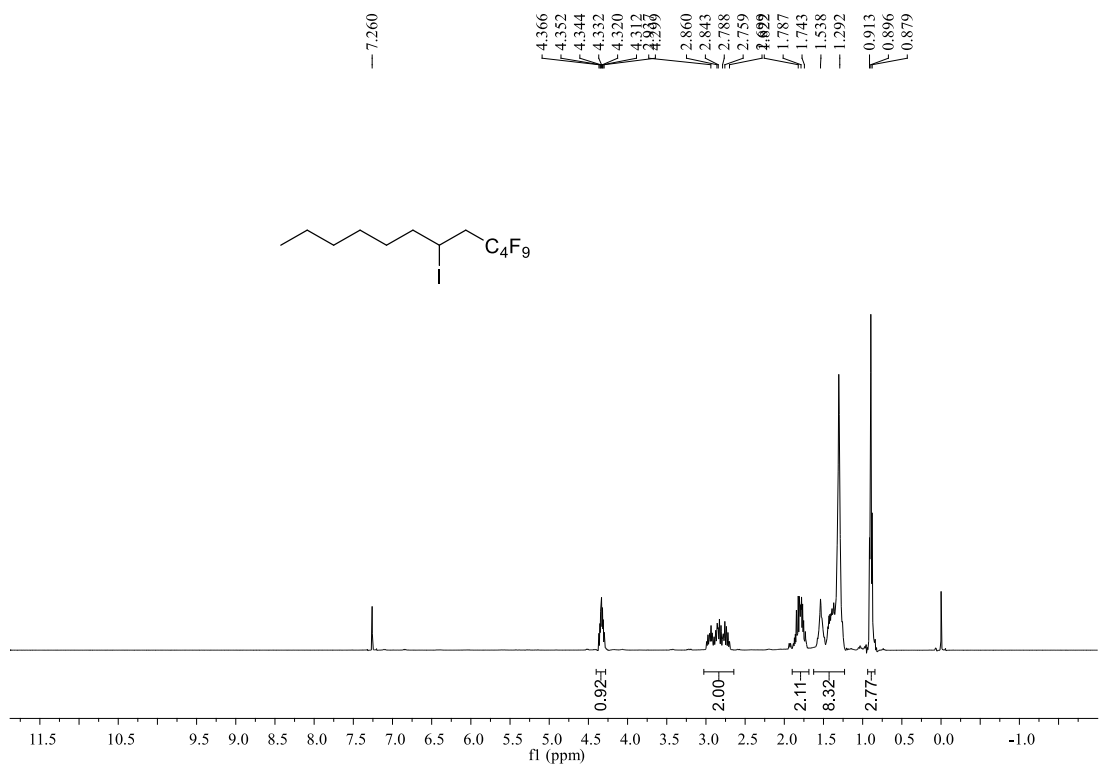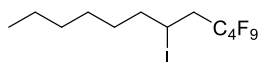

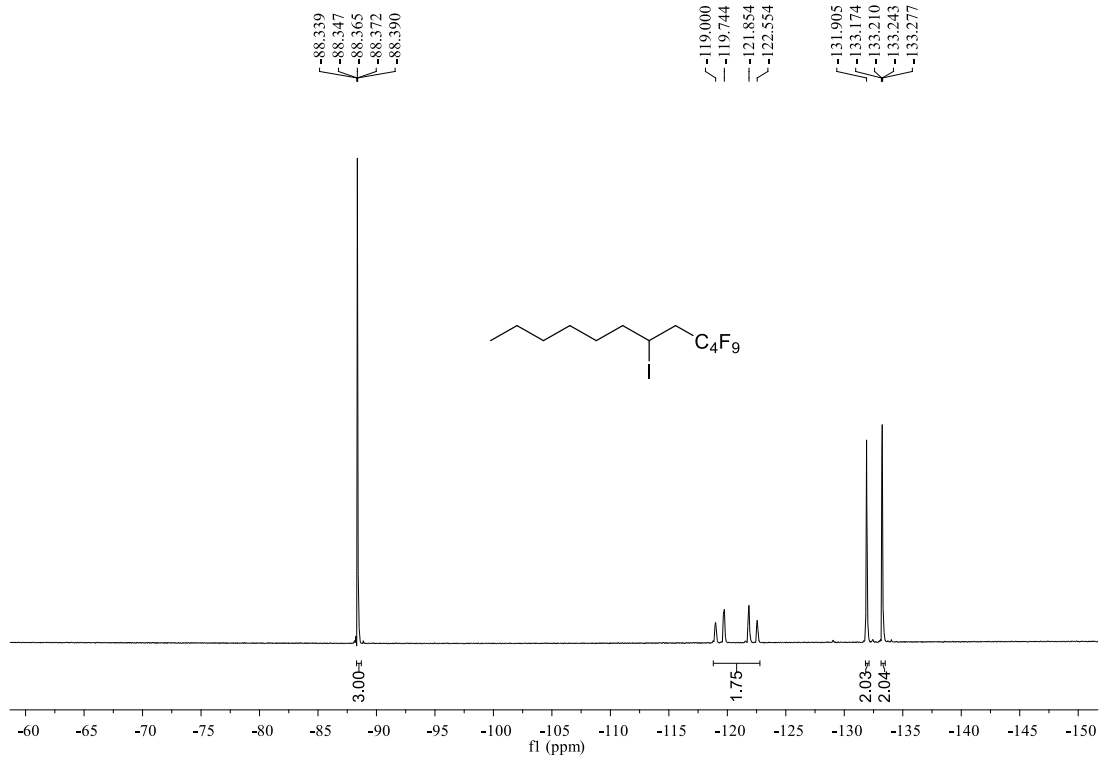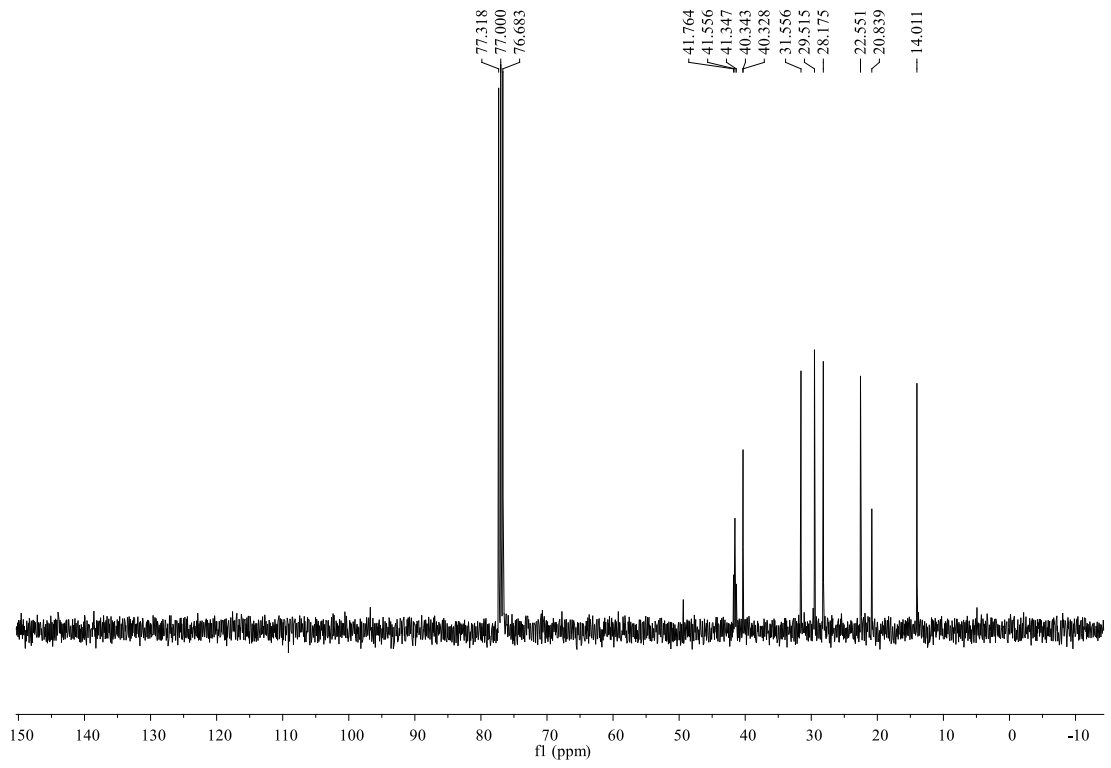

**1,1,1,2,2,3,3,4,4,5,5,6,6-tridecafluoro-8-iodotetradecane (3k).**

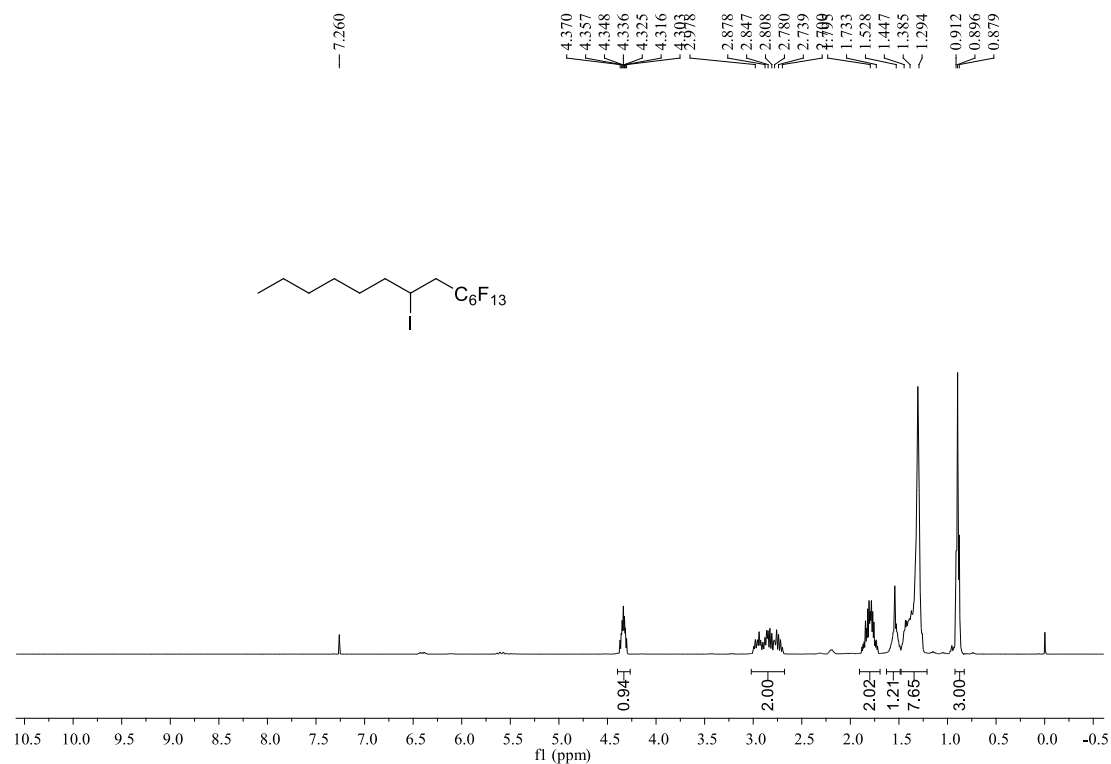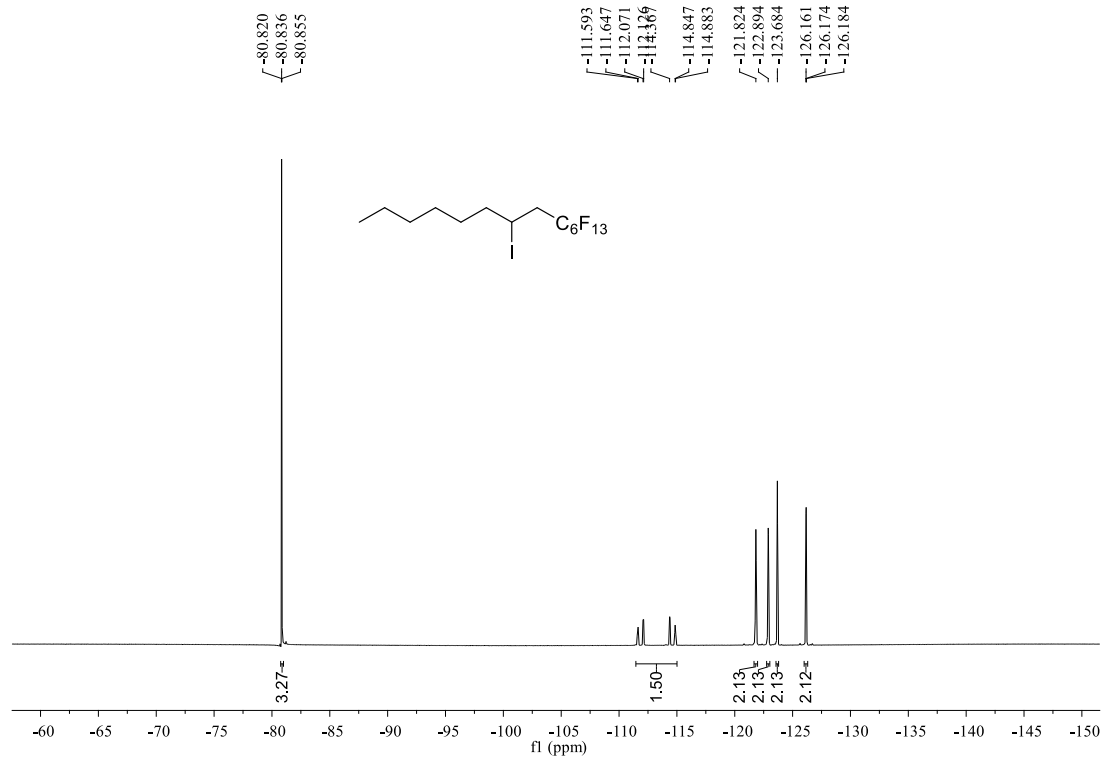

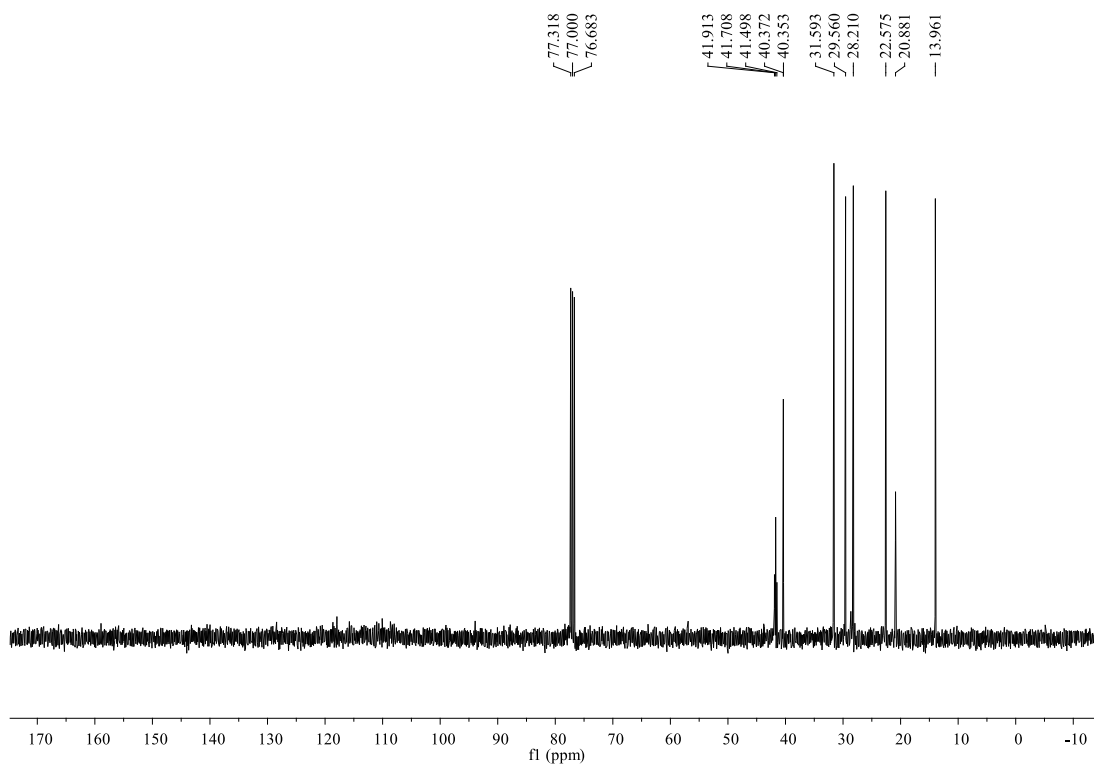

**(3,3,4,4,5,5,6,6,6-nonafluoro-1-iodohexyl)cyclohexane (3l).**

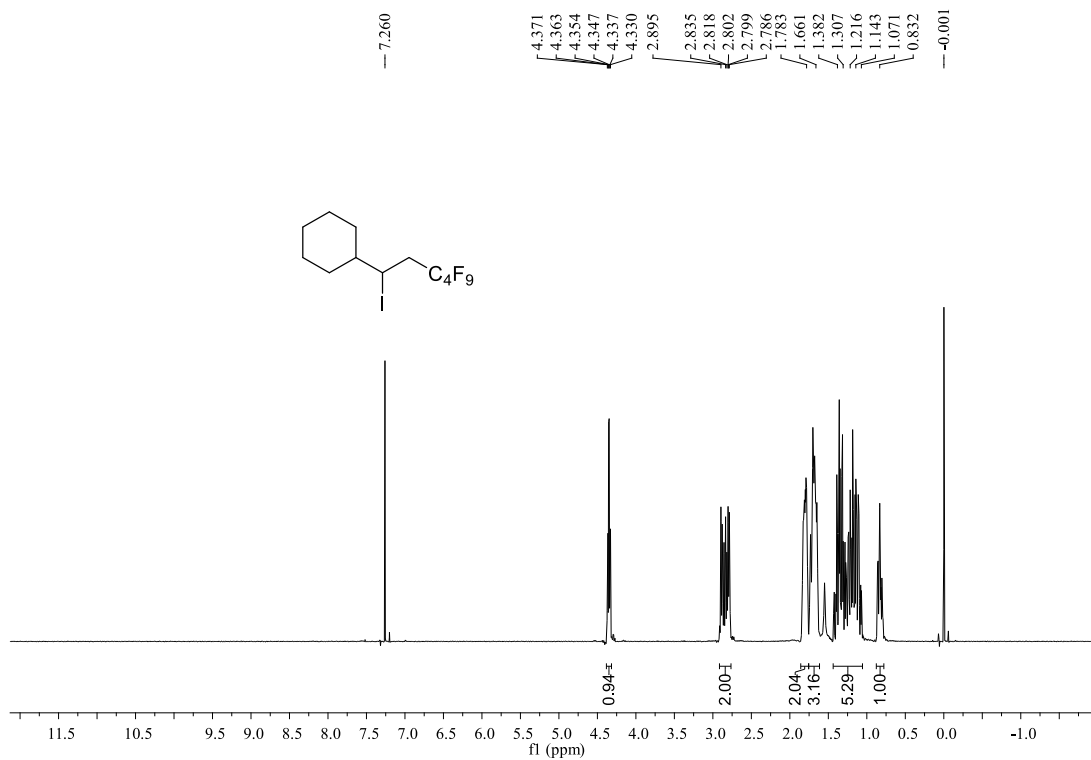

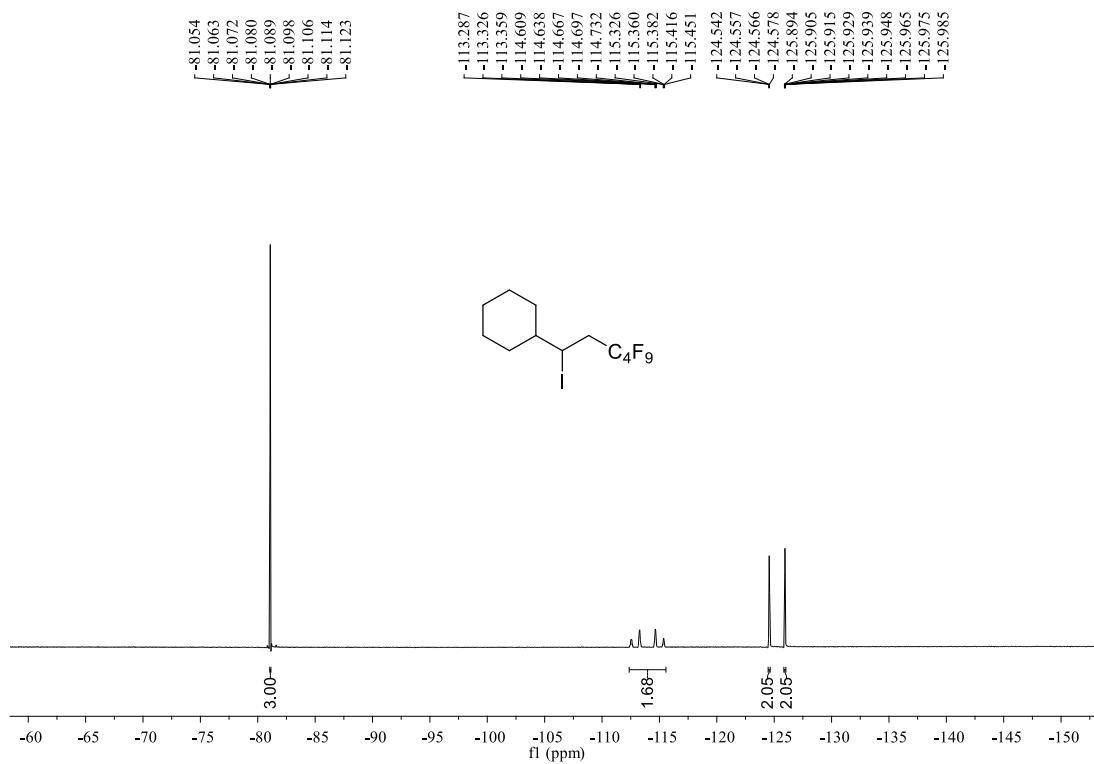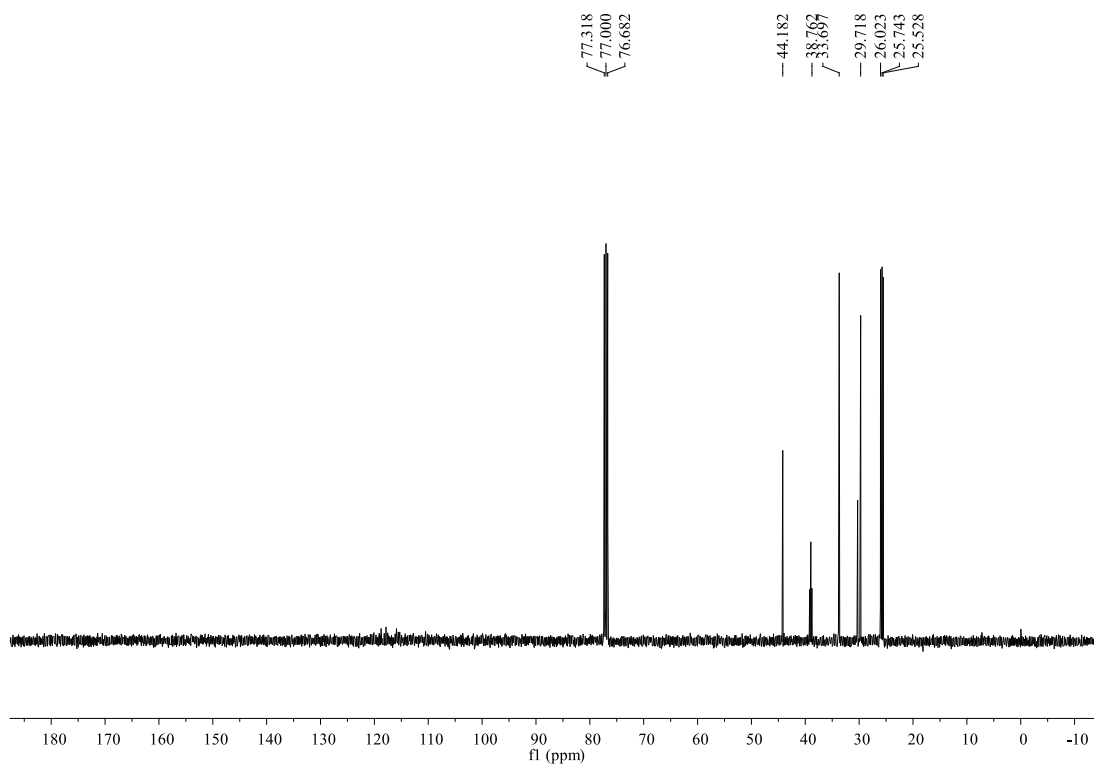

**(3,3,4,4,5,5,6,6,7,7,8,8,8-tridecafluoro-1-iodooctyl)cyclohexane (3m).**

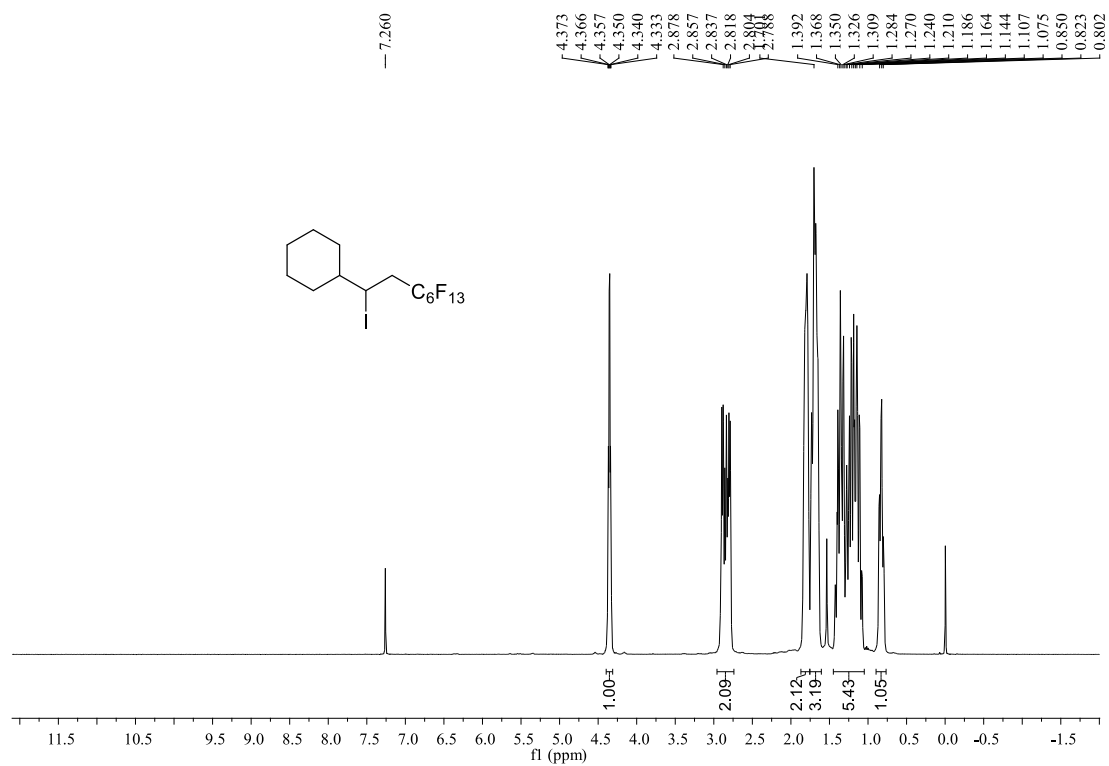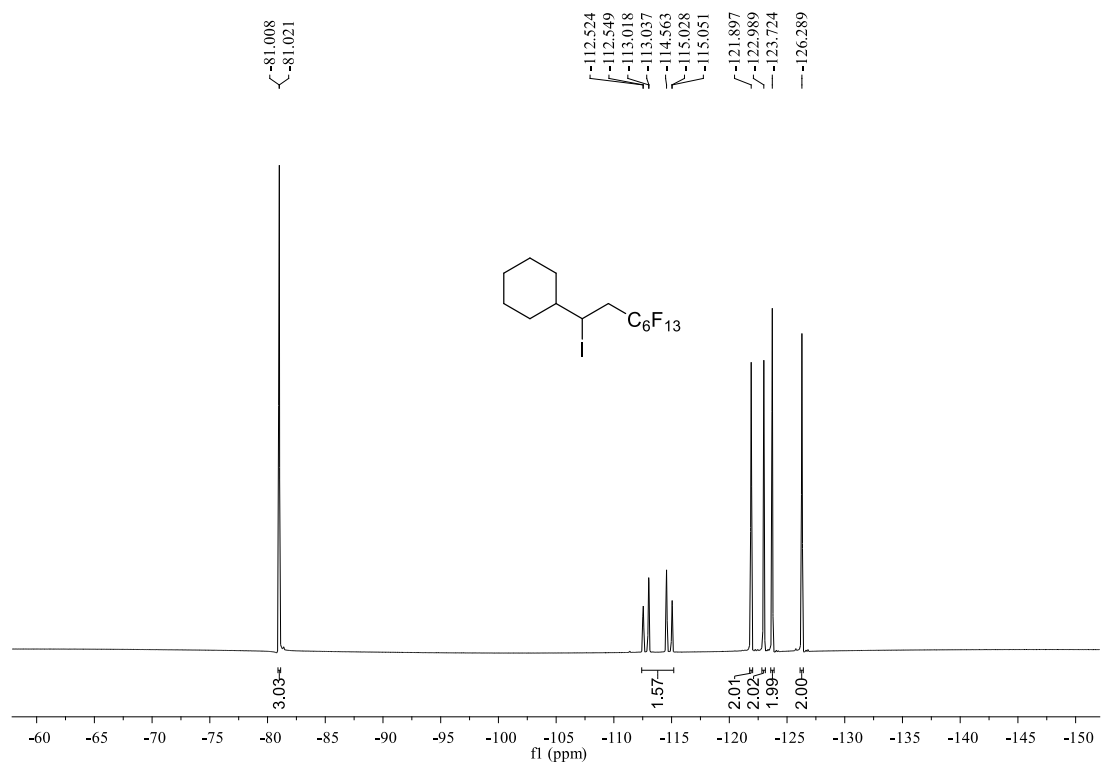

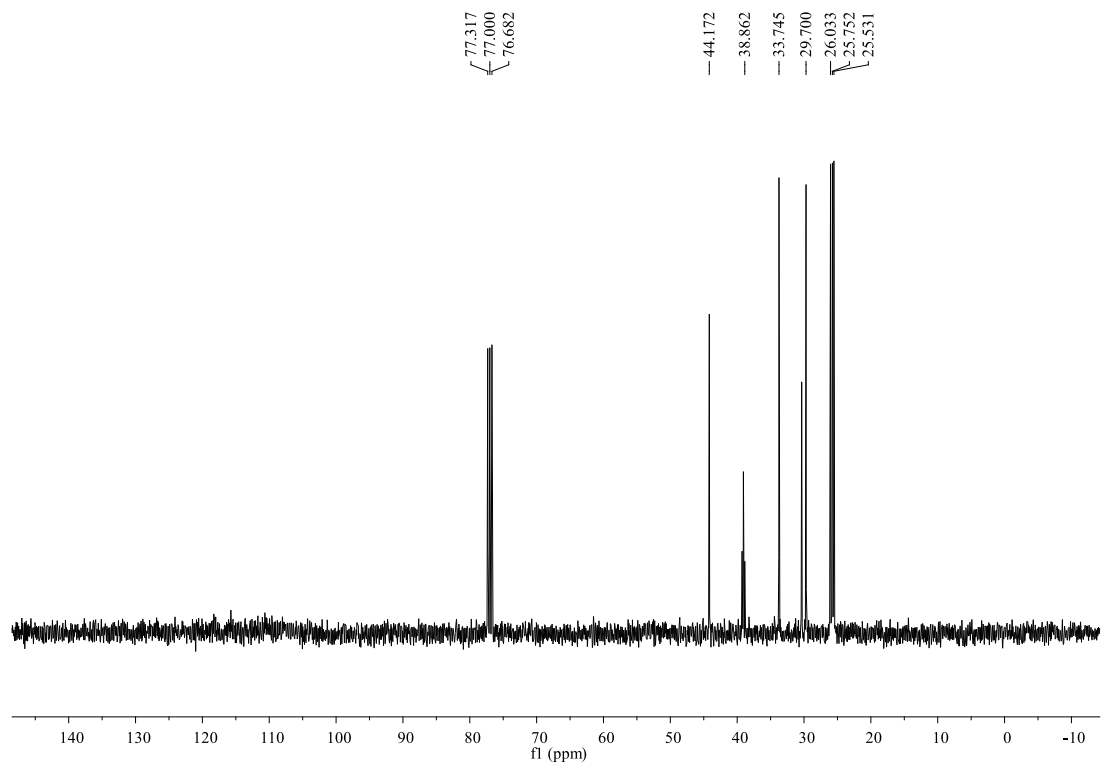

**(4,4,5,5,6,6,7,7,7-nonafluoro-2-iodoheptyl)benzene (3n).**

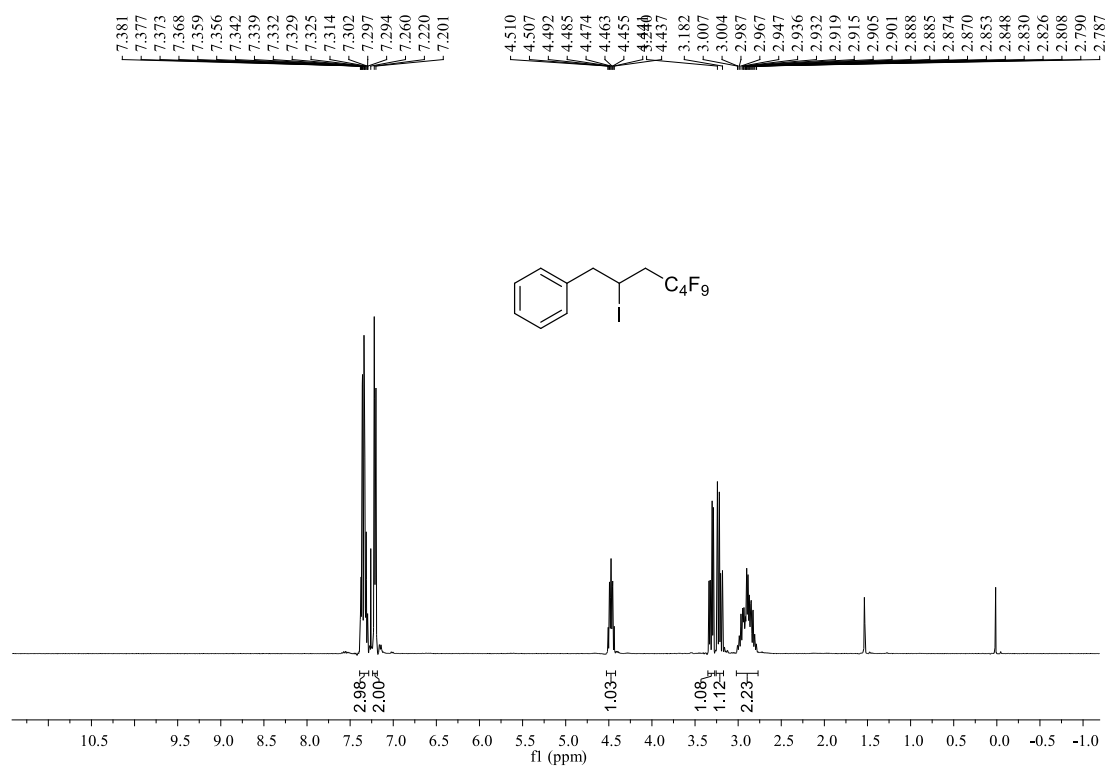

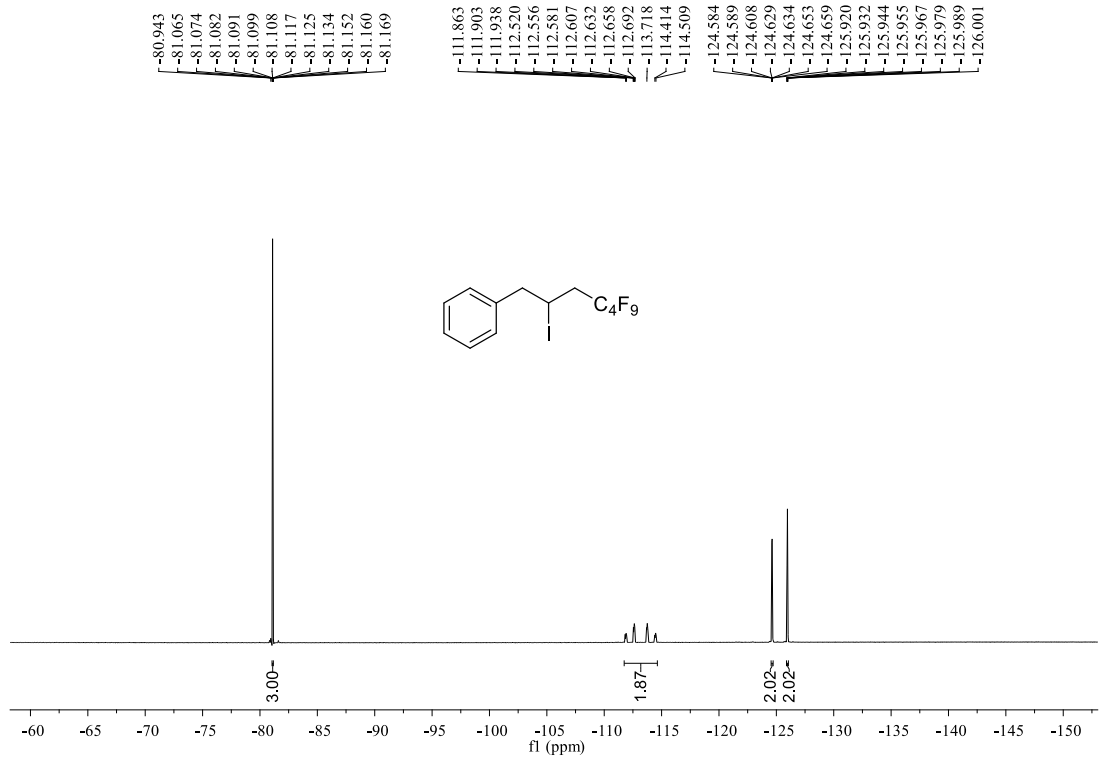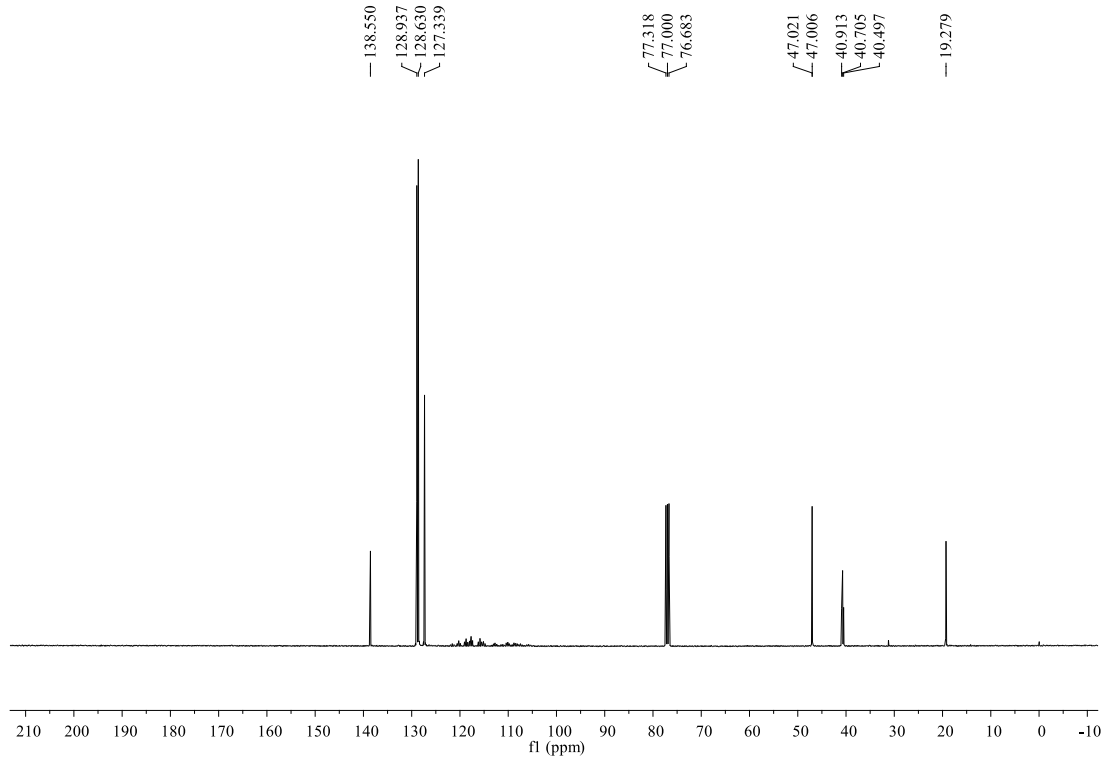



**1-methoxy-4-(4,4,5,5,6,6,7,7,8,8,9,9,9-tridecafluoro-2-iodononyl)benzene (3o).**

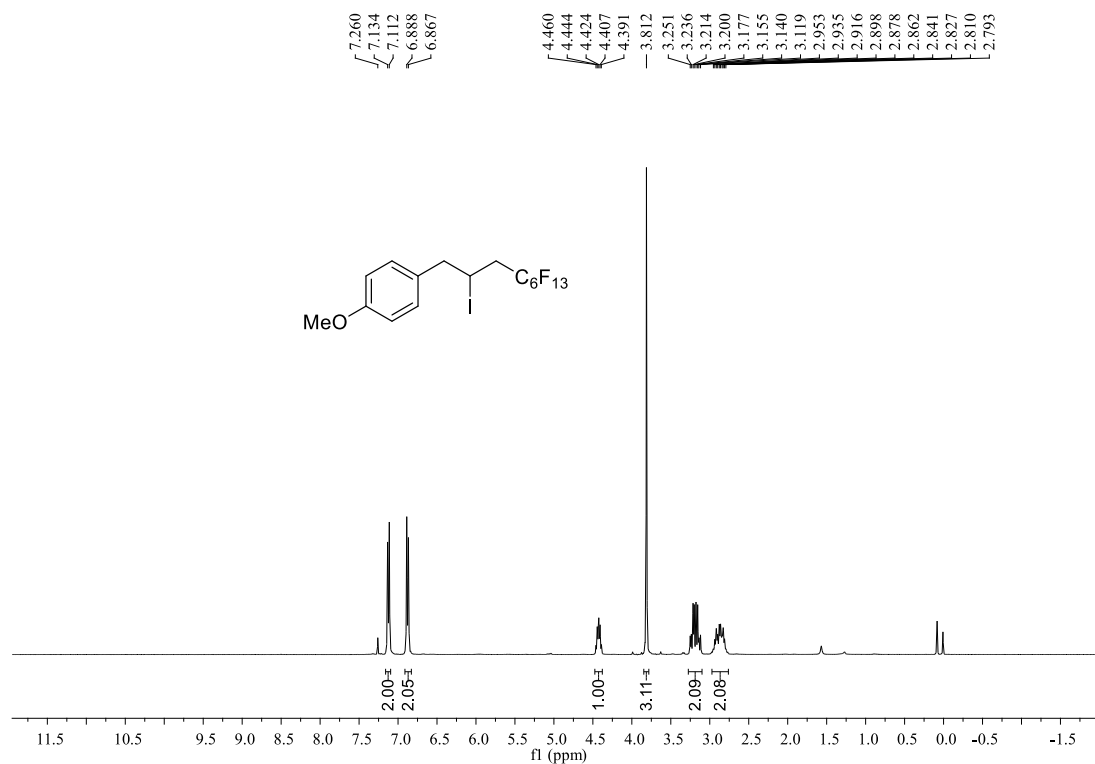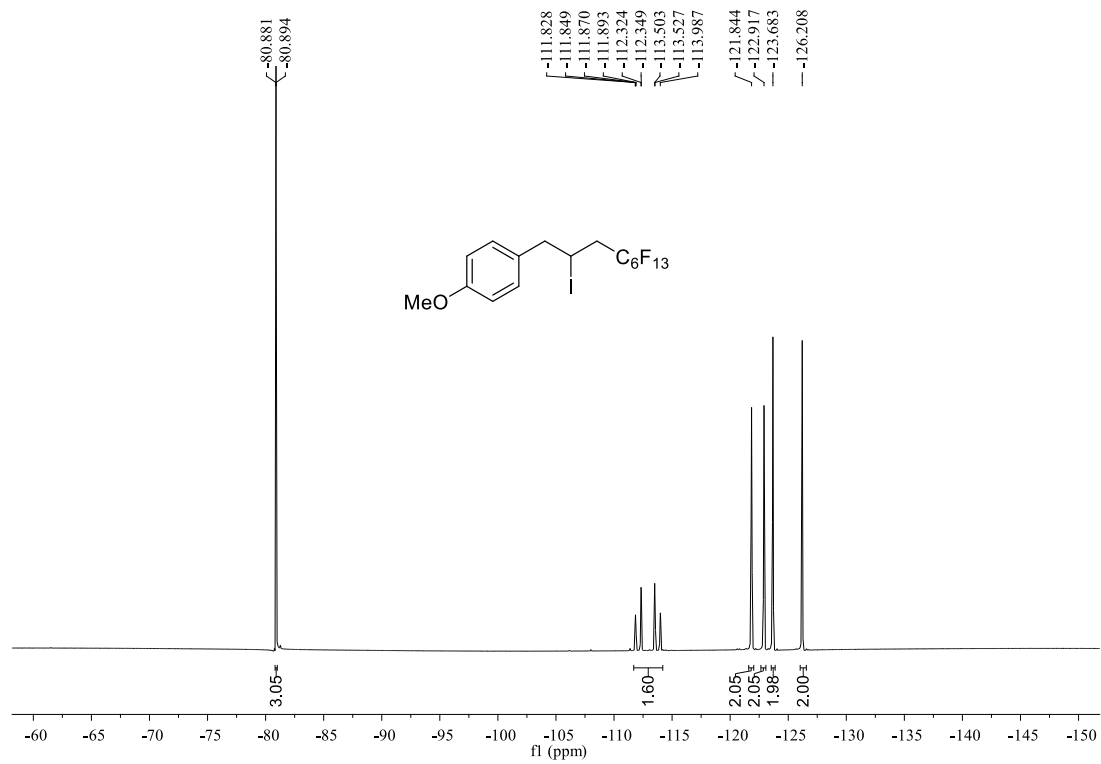

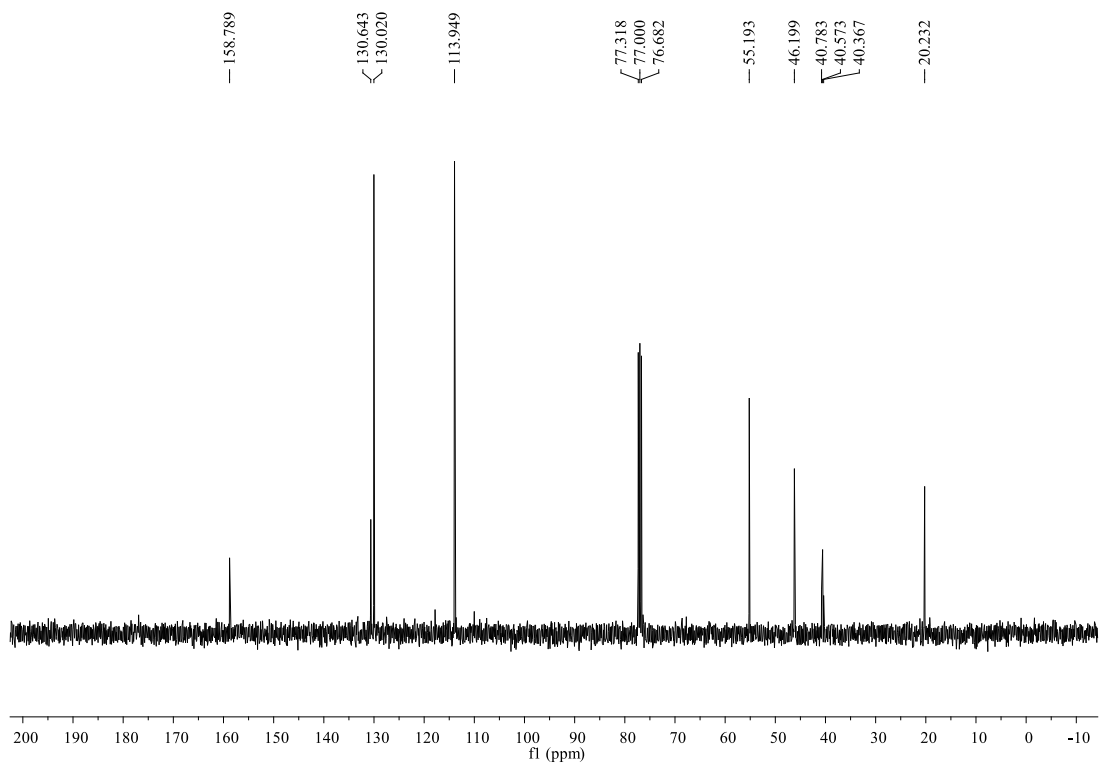

**Tert-butyl (4,4,4-trifluoro-2-iodobutyl)carbamate (3p).**

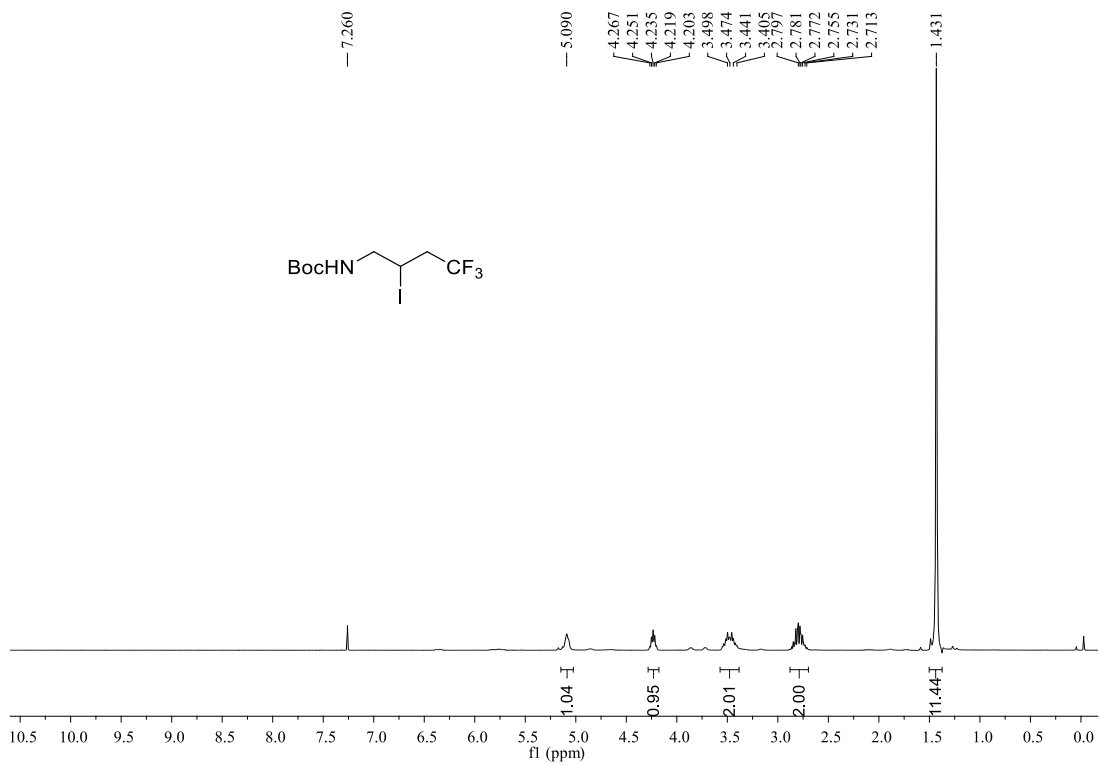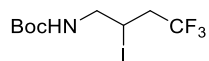

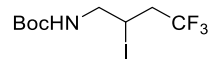

-63.963  
 -63.989  
 -64.016

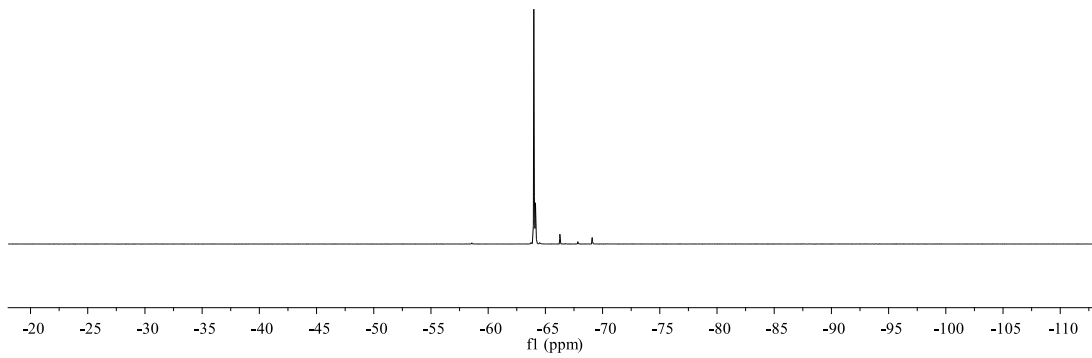

155.557

129.515  
 126.749  
 123.983  
 121.217

80.133  
 77.318  
 77.000  
 76.682

48.495

41.790  
 41.210

28.226

19.988

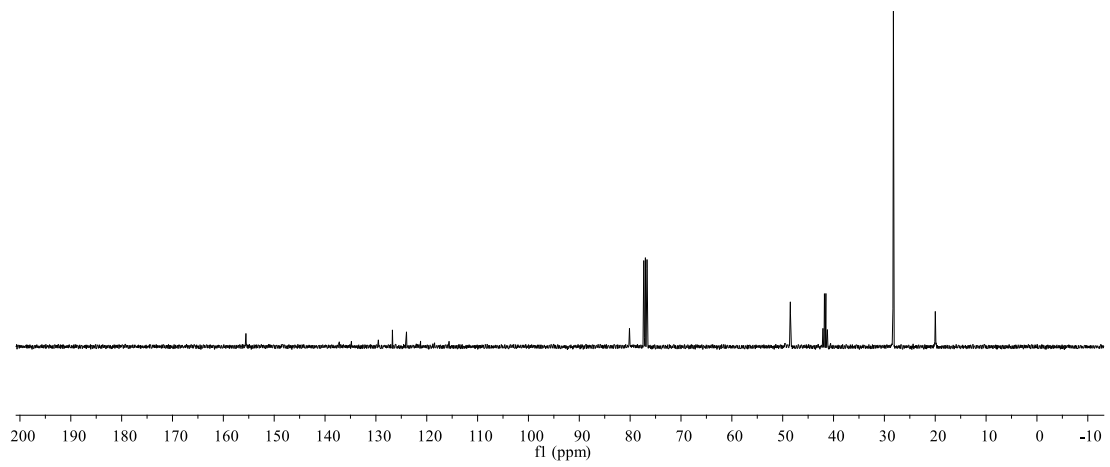

**1,1,1-trifluoro-3-iodononane (3q).**

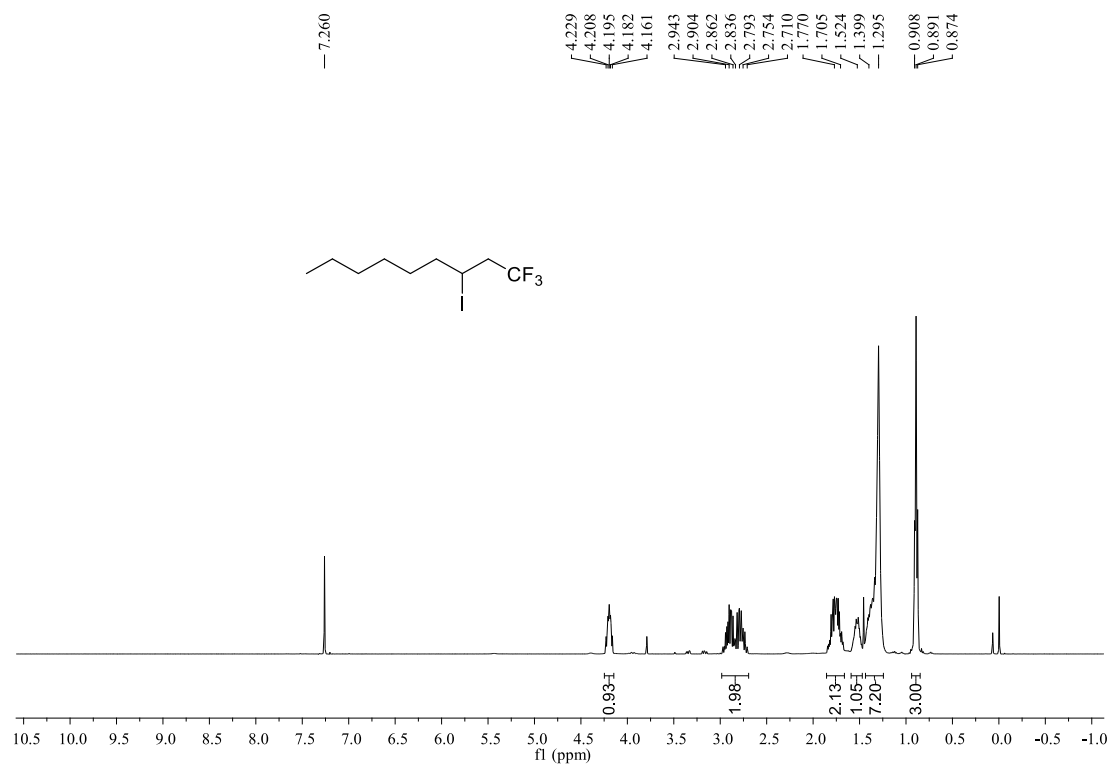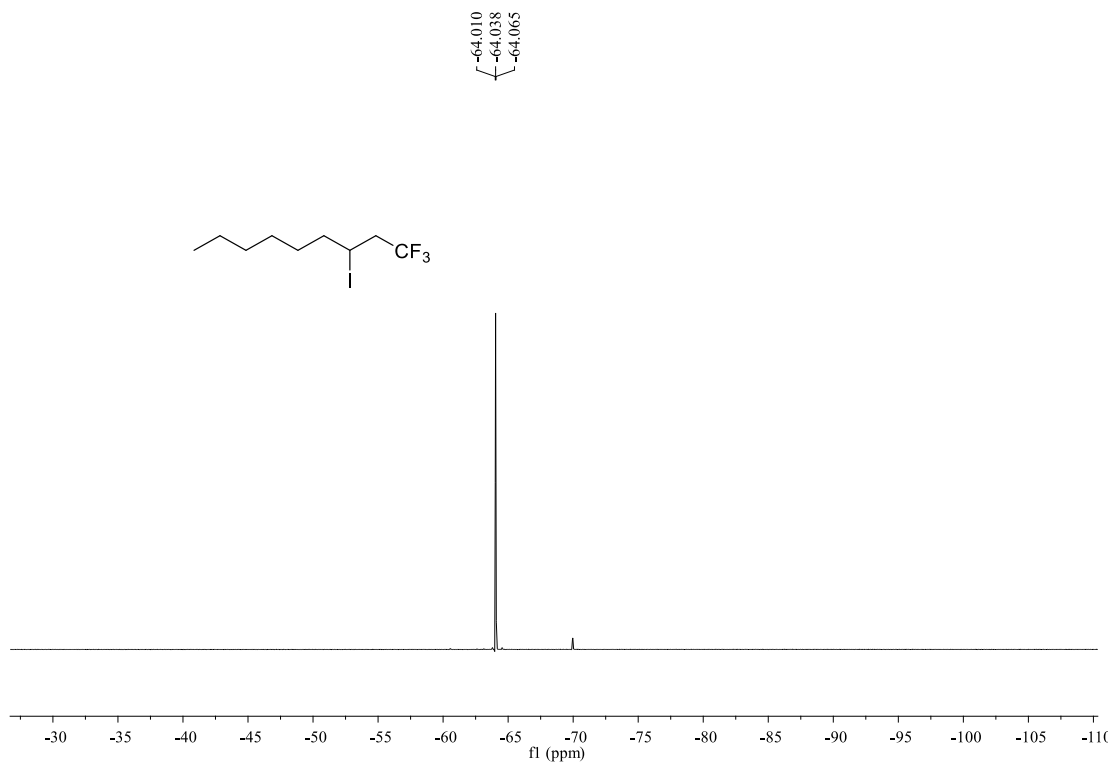

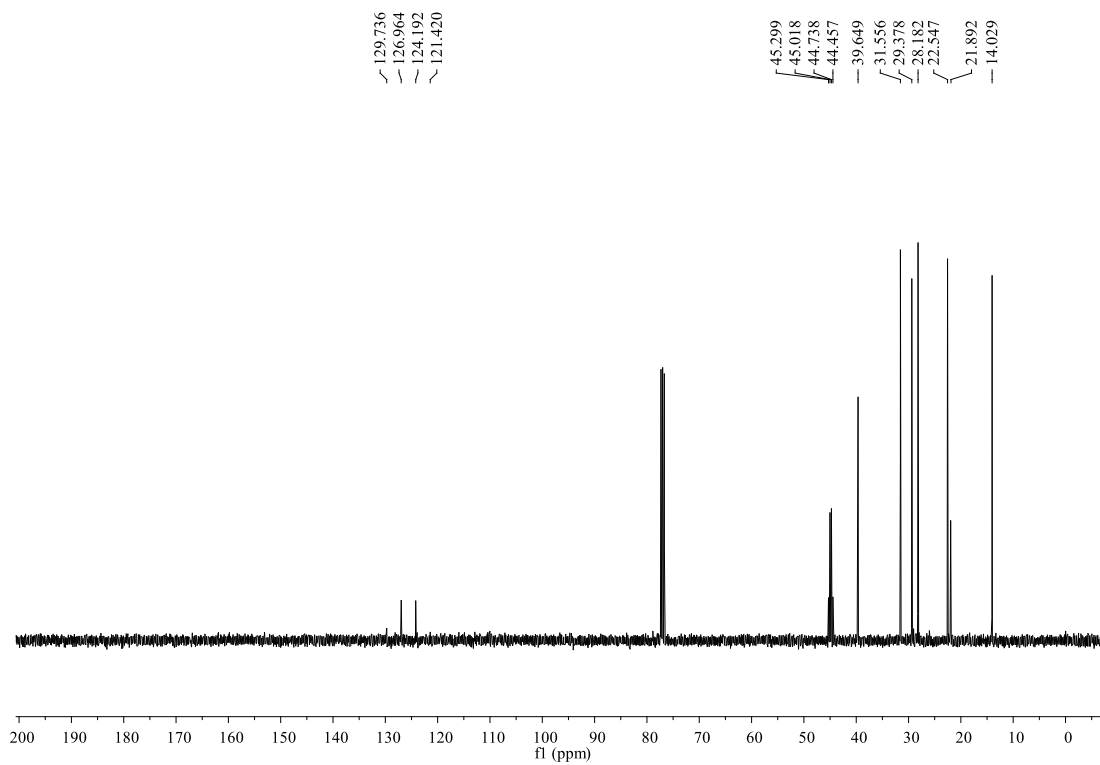

**(4,4,4-trifluoro-2-iodobutyl)benzene (3r).**

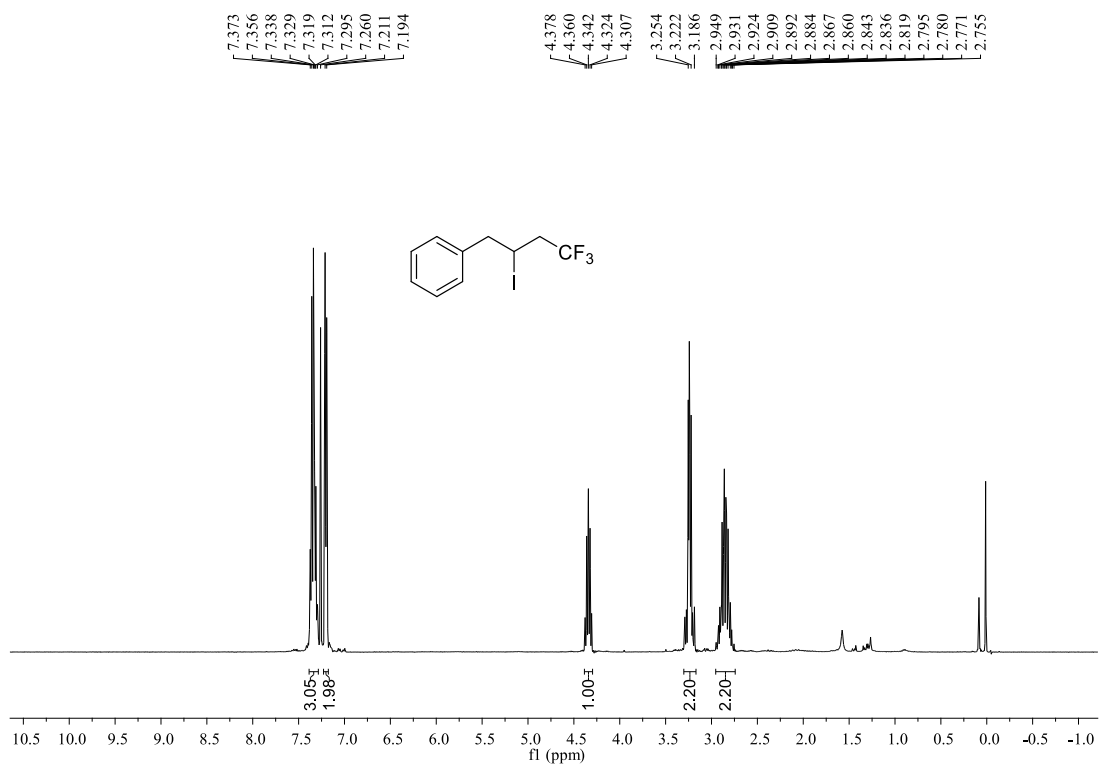

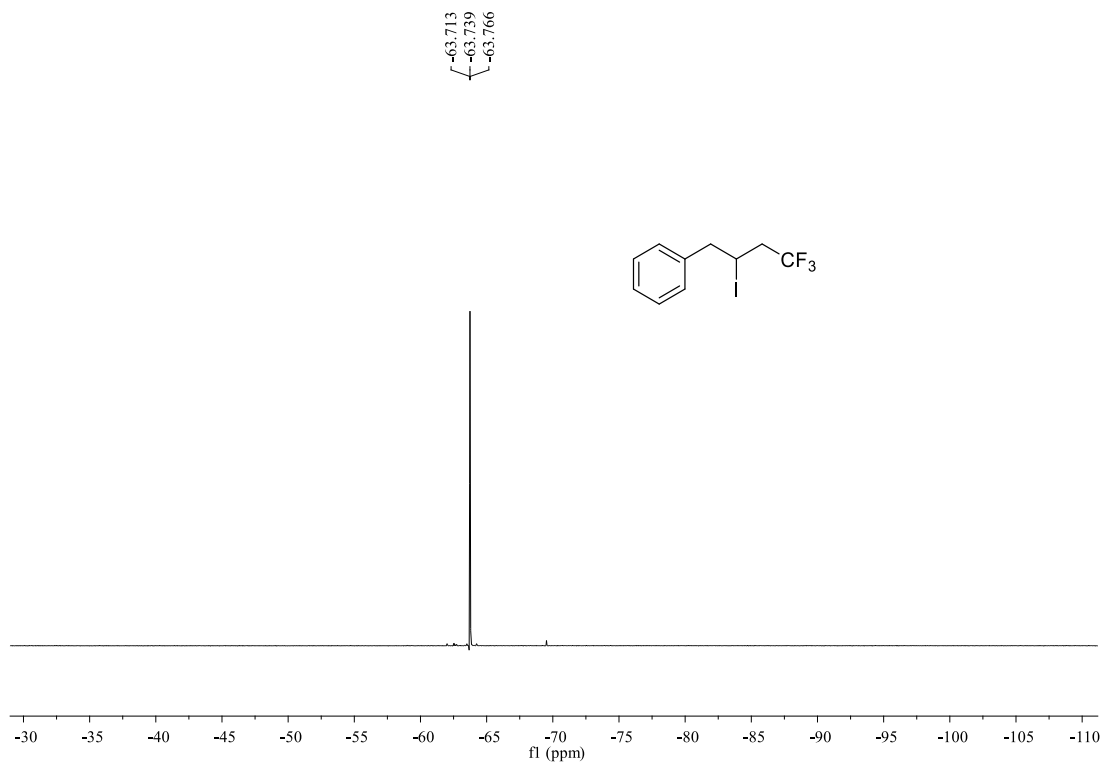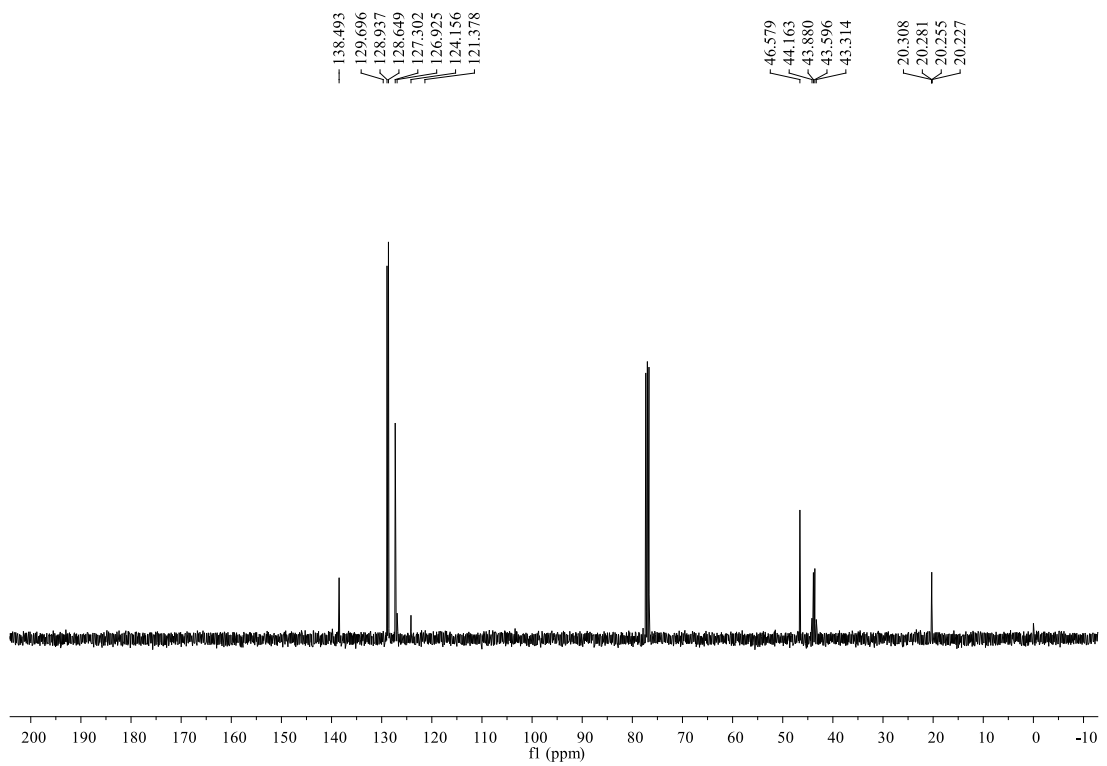

**Ethyl (*E*)-2,2-difluoro-4-iododec-3-enoate (5a).**

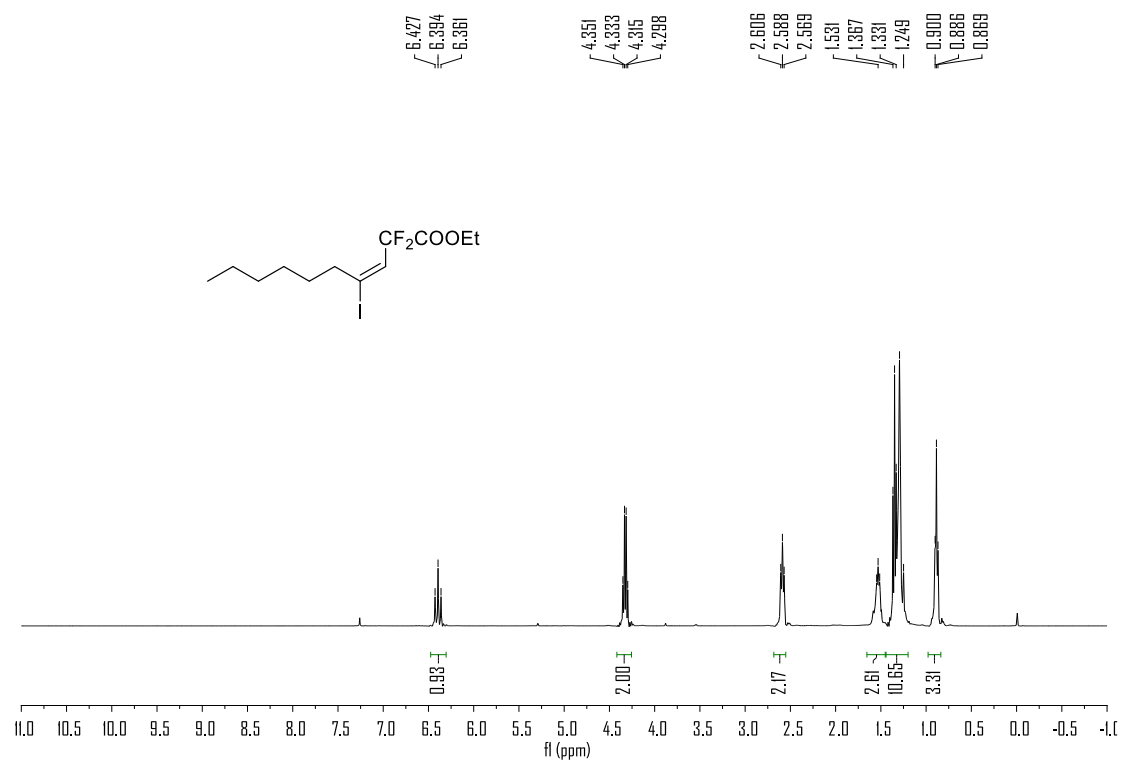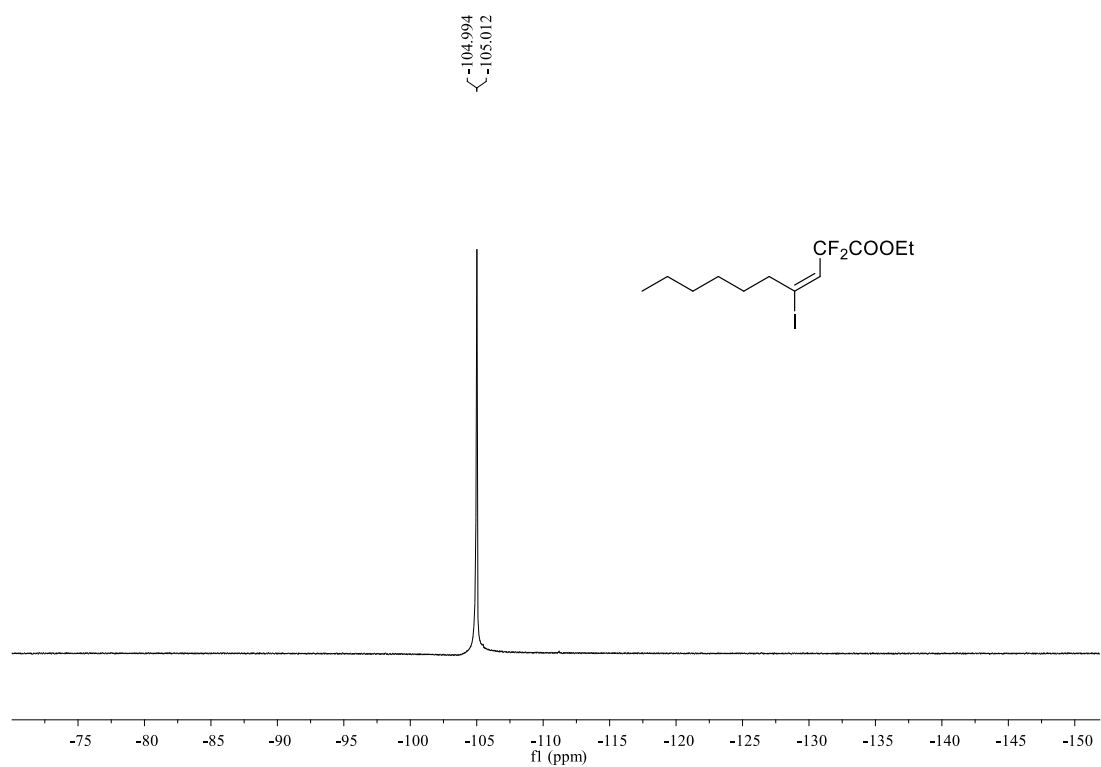

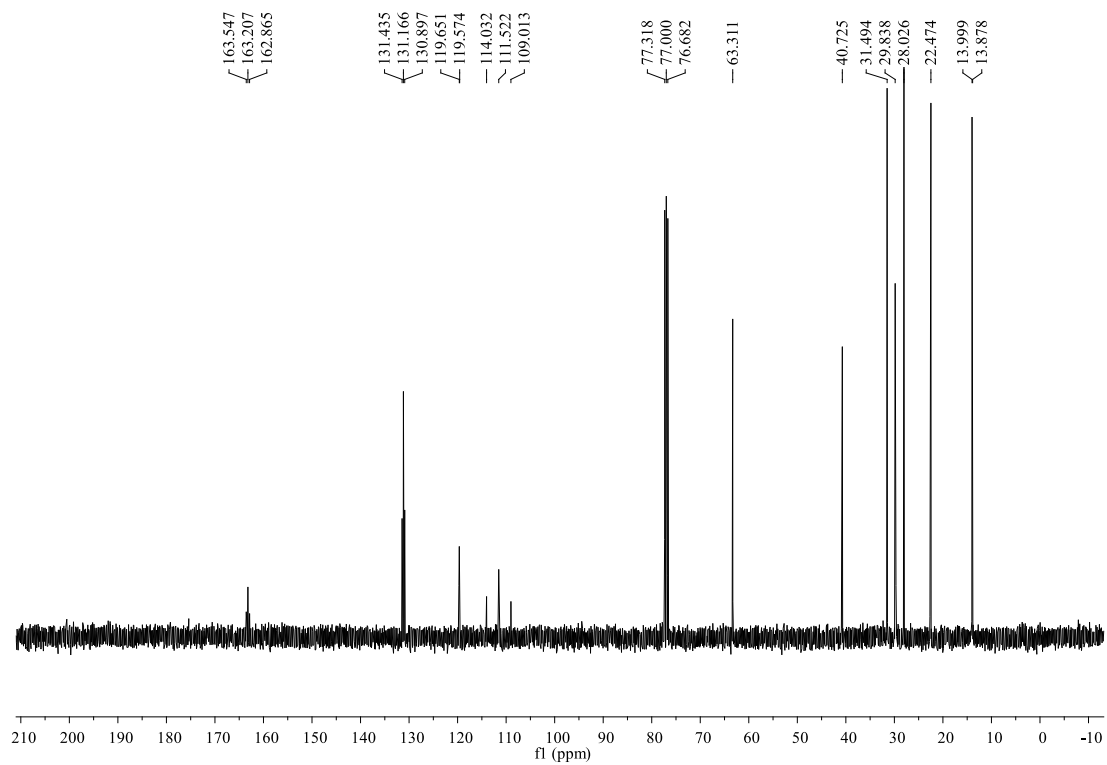

**Ethyl (*E*)-7-chloro-2,2-difluoro-4-iodohept-3-enoate (5b).**

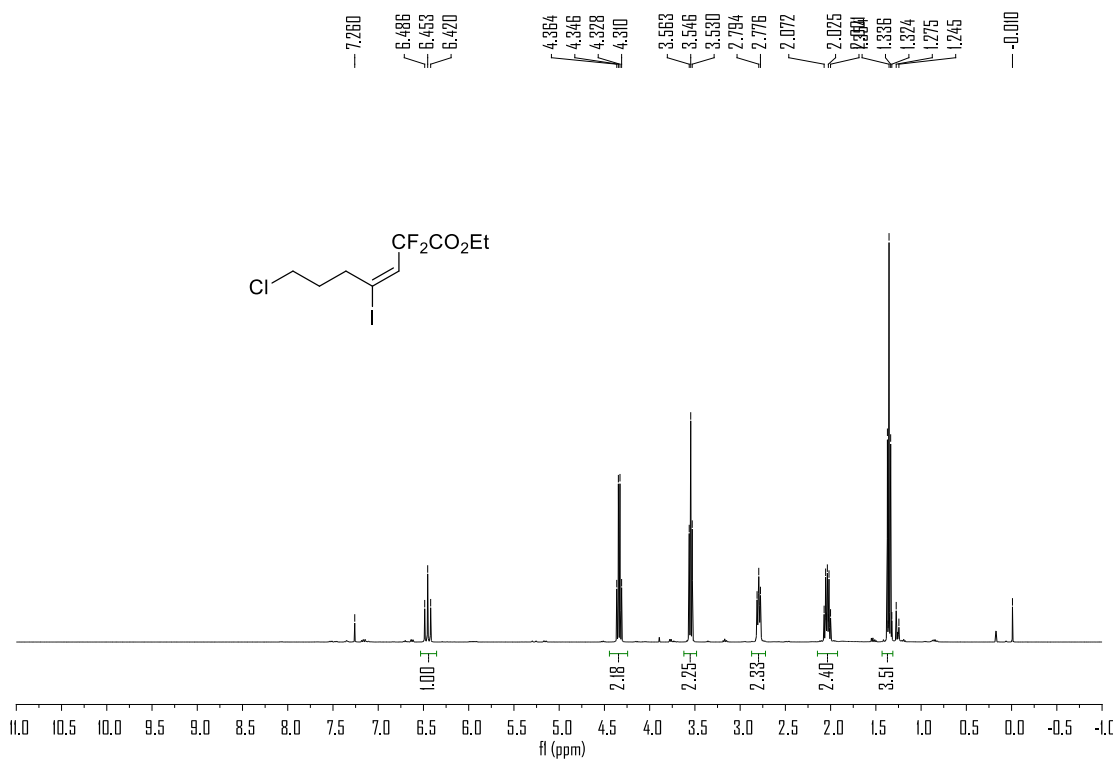



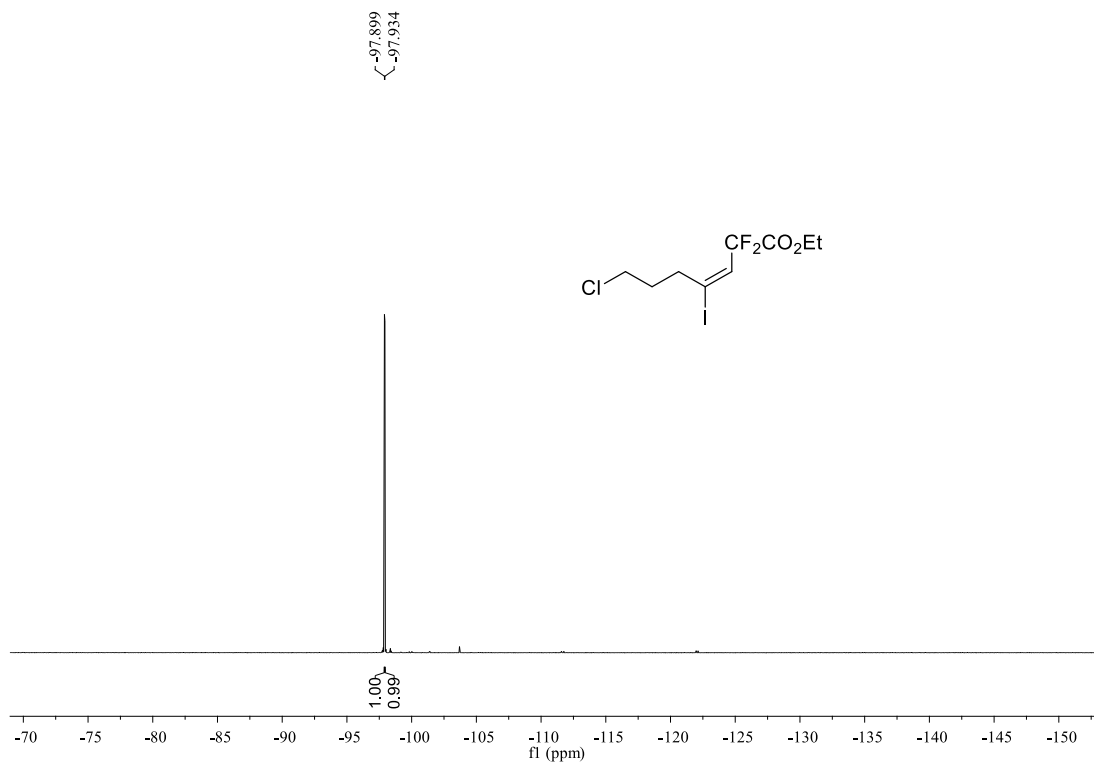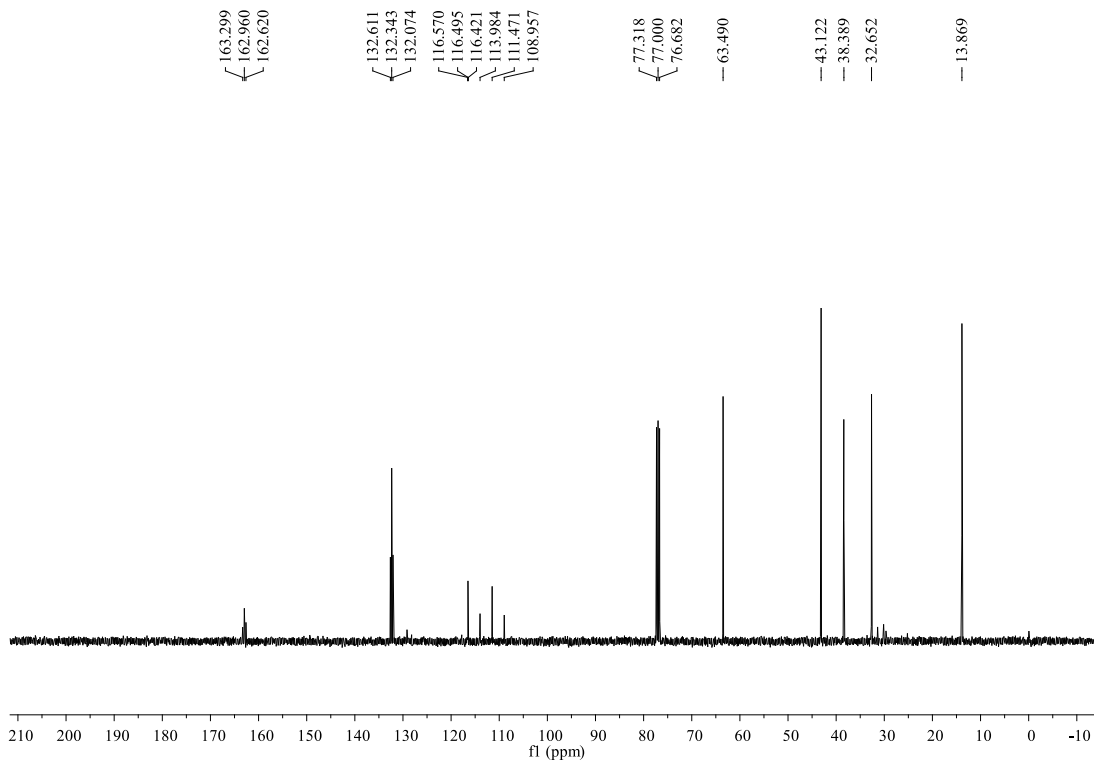

**Ethyl (*E*)-4-(2-chlorophenyl)-2,2-difluoro-4-iodobut-3-enoate (5c).**

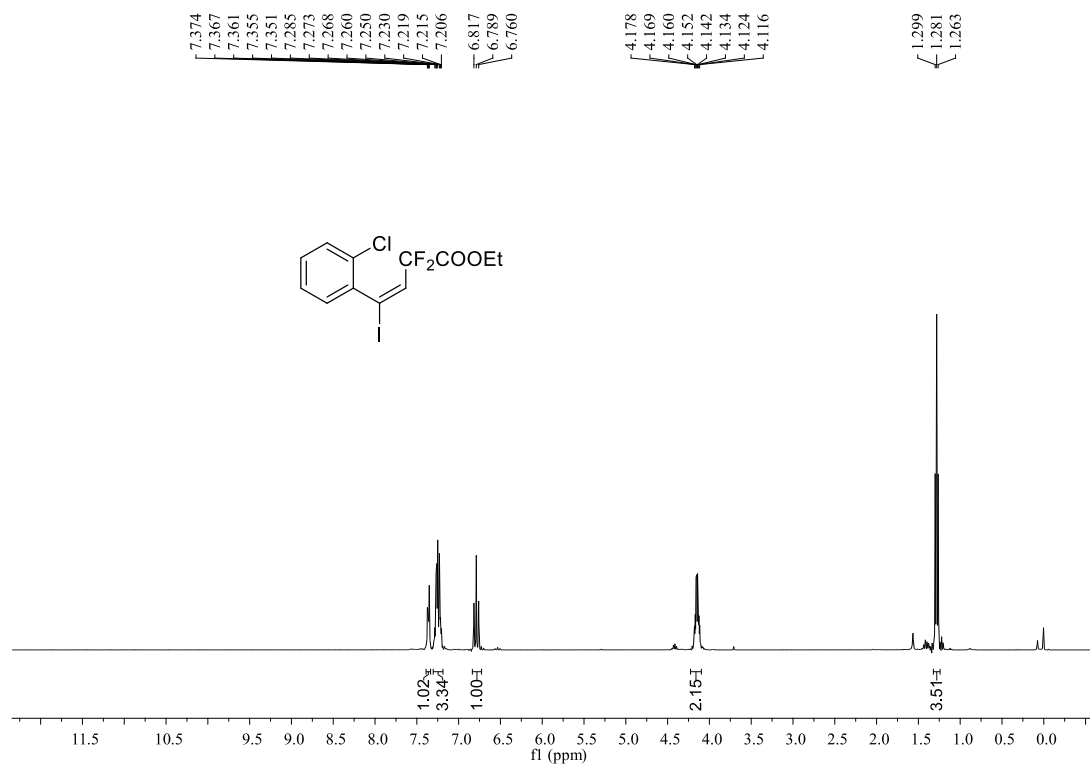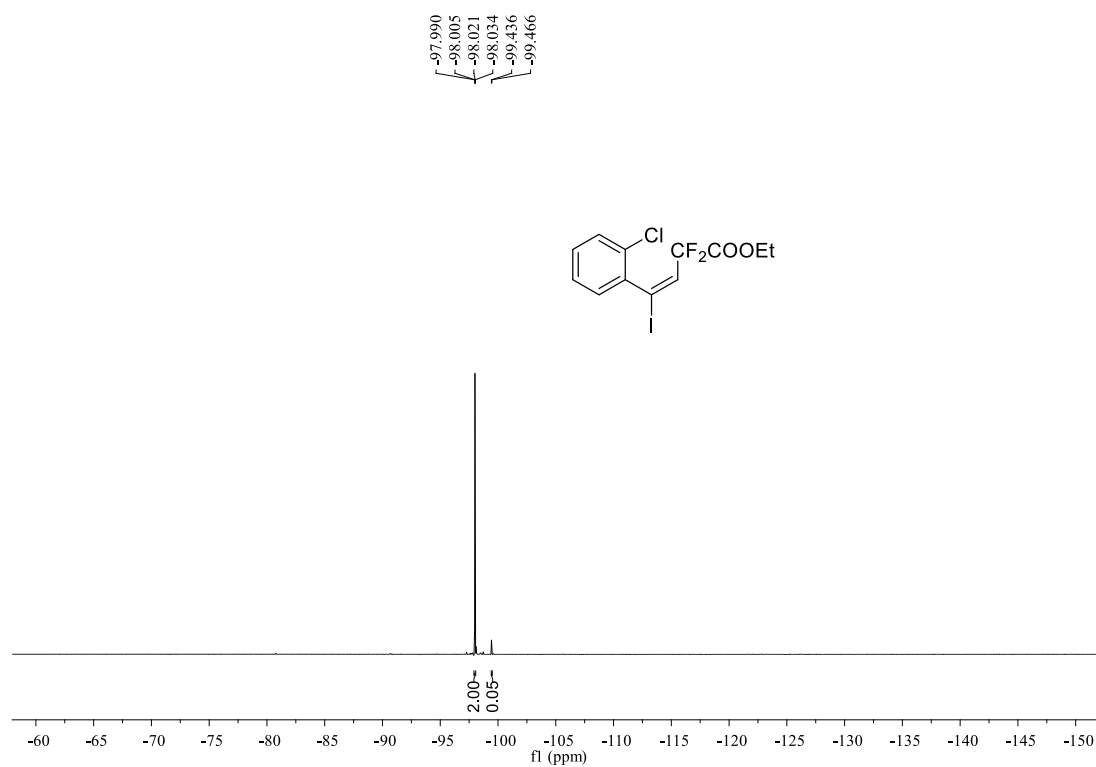

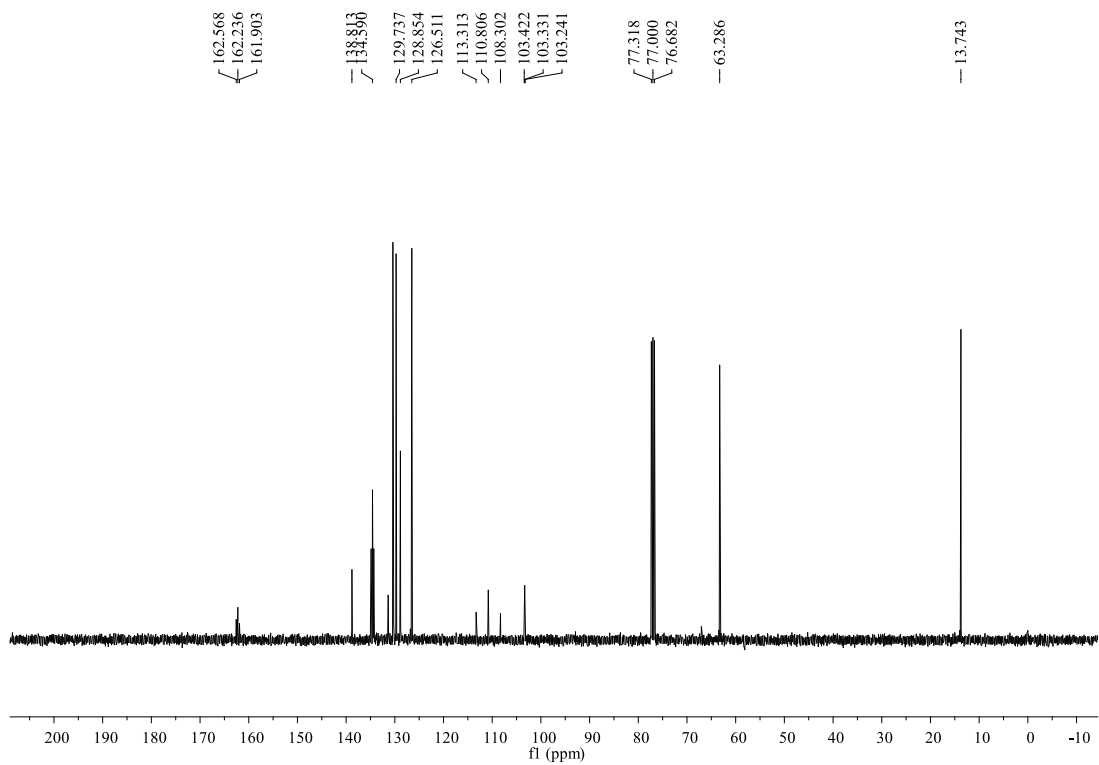

**Ethyl (*E*)-4-(4-cyanophenyl)-2,2-difluoro-4-iodobut-3-enoate (5d).**

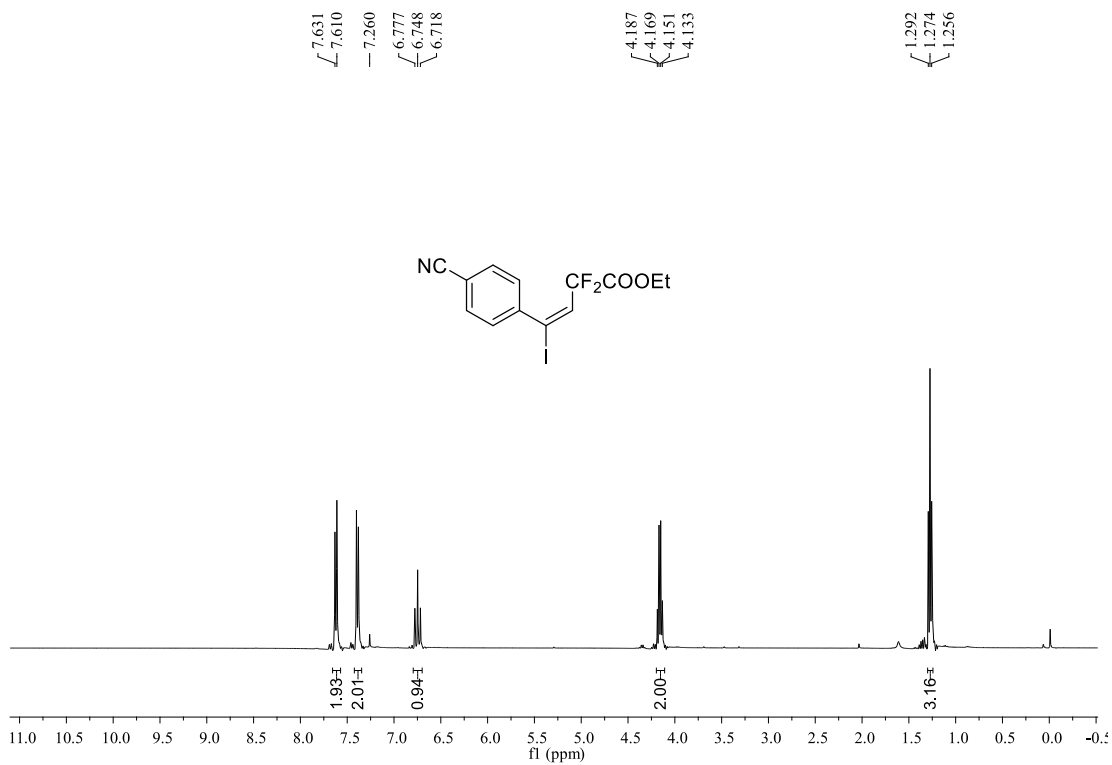

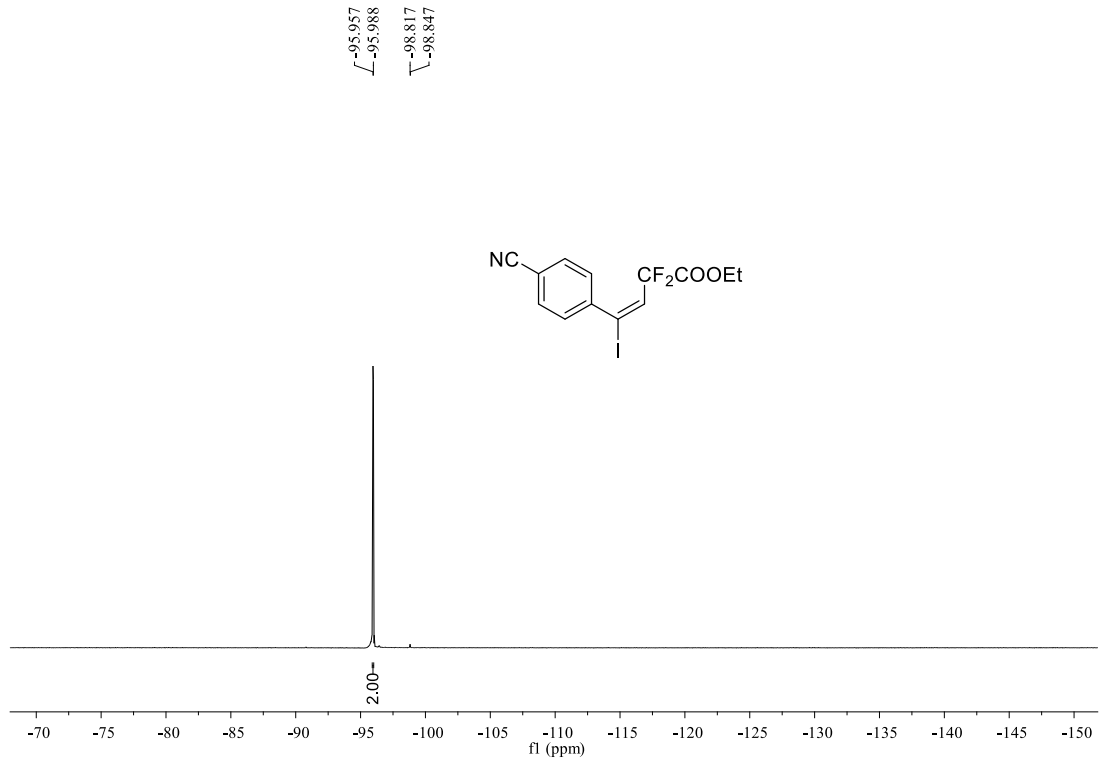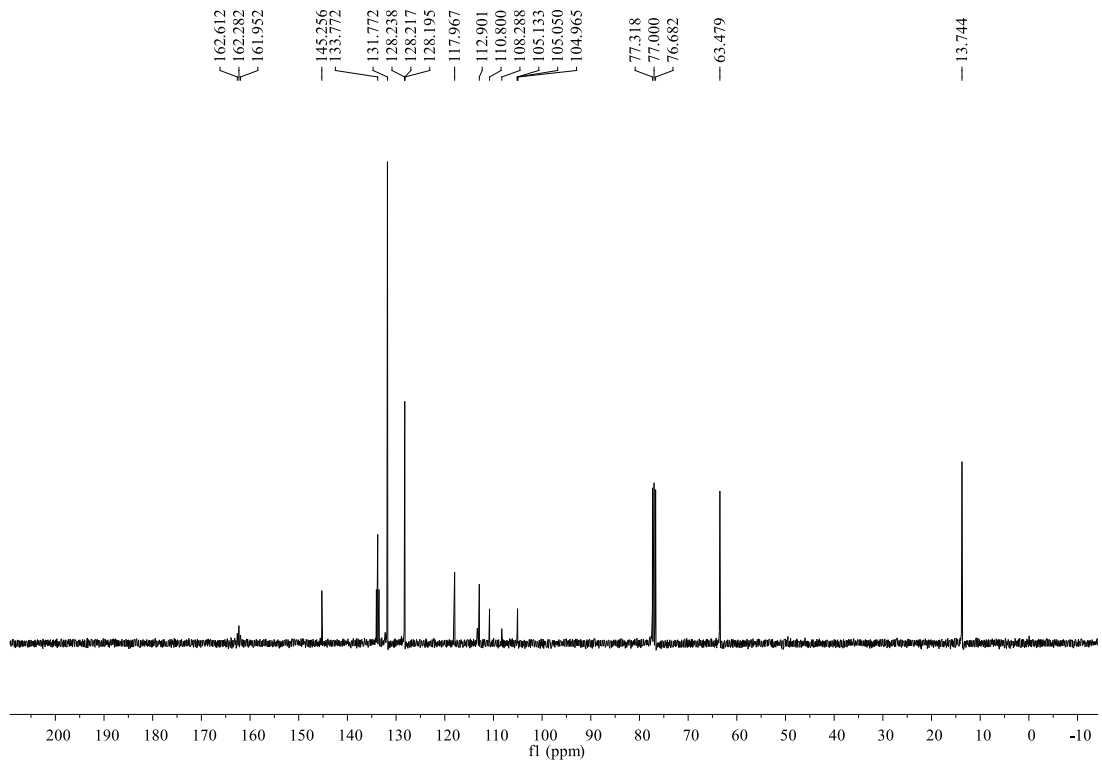

**Ethyl (*E*)-2,2-difluoro-4-(4-fluorophenyl)-4-iodobut-3-enoate (5e).**

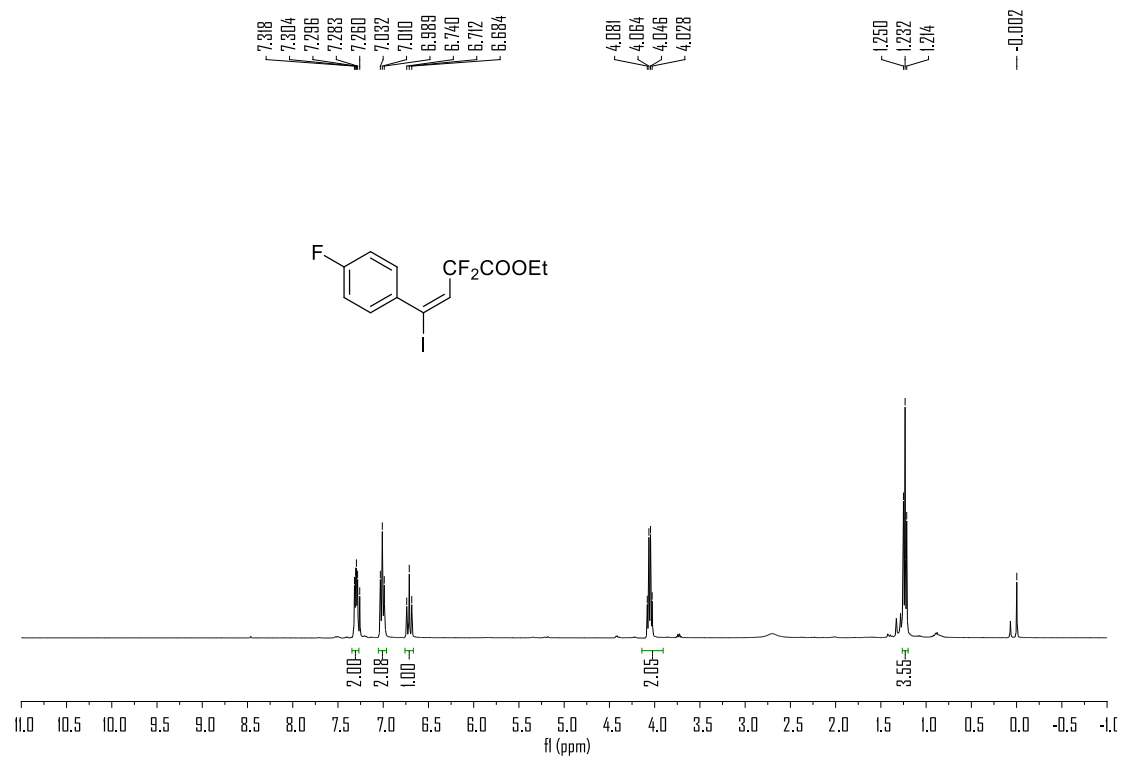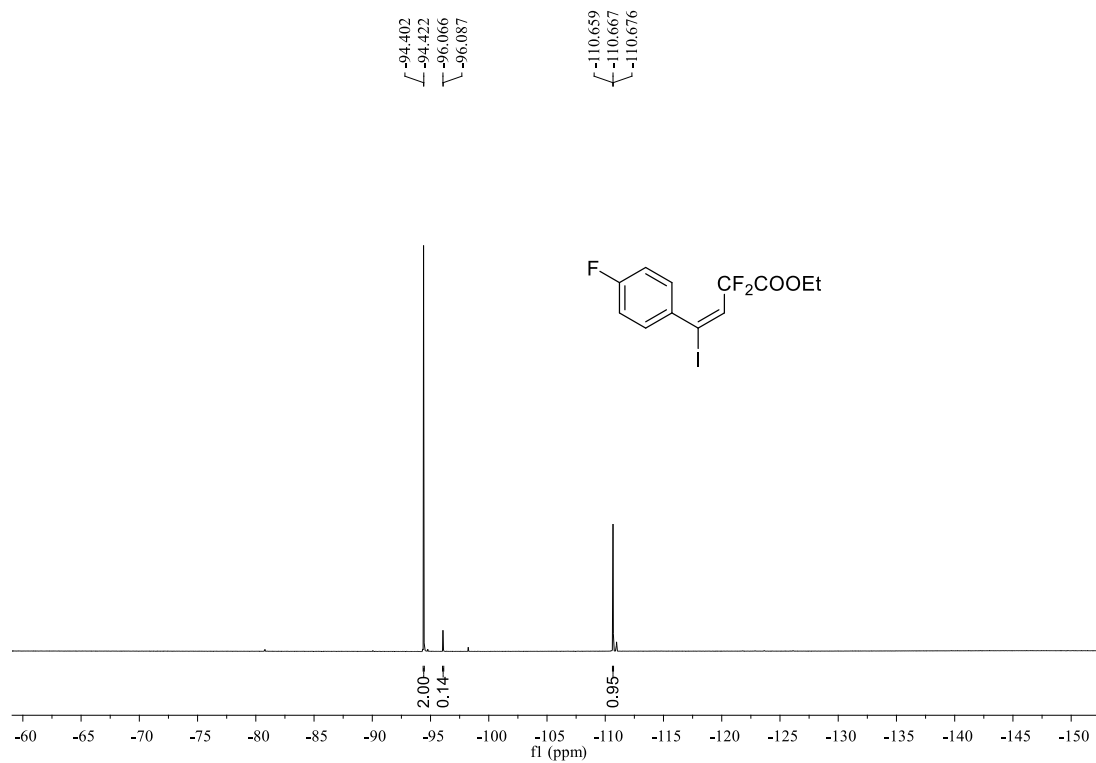

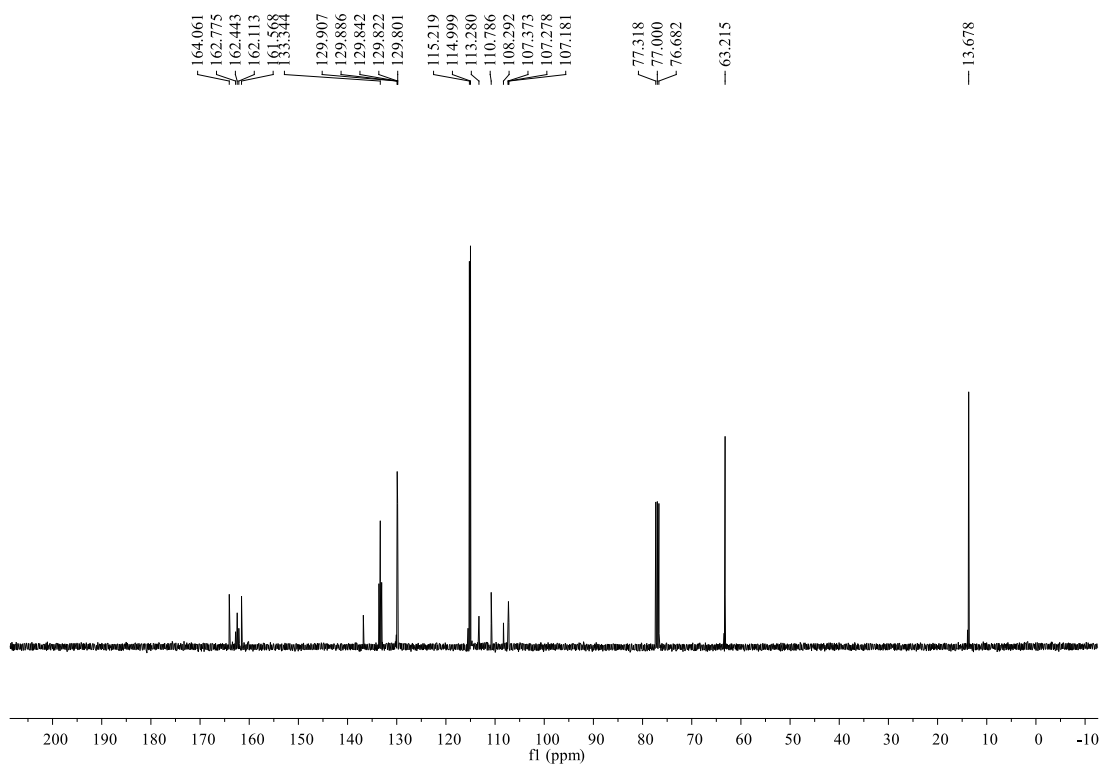

**Ethyl (*E*)-2,2-difluoro-4-(4-(trifluoromethyl)phenyl)but-3-enoate (5f).**

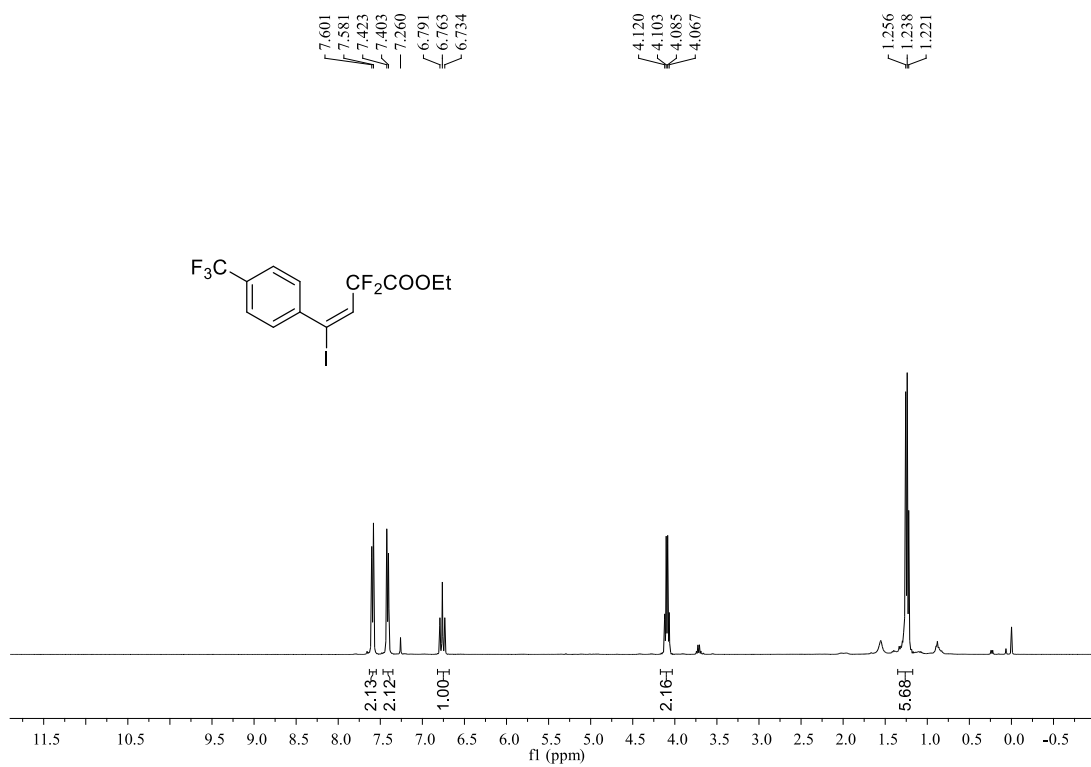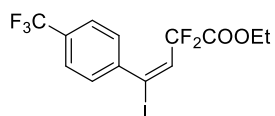

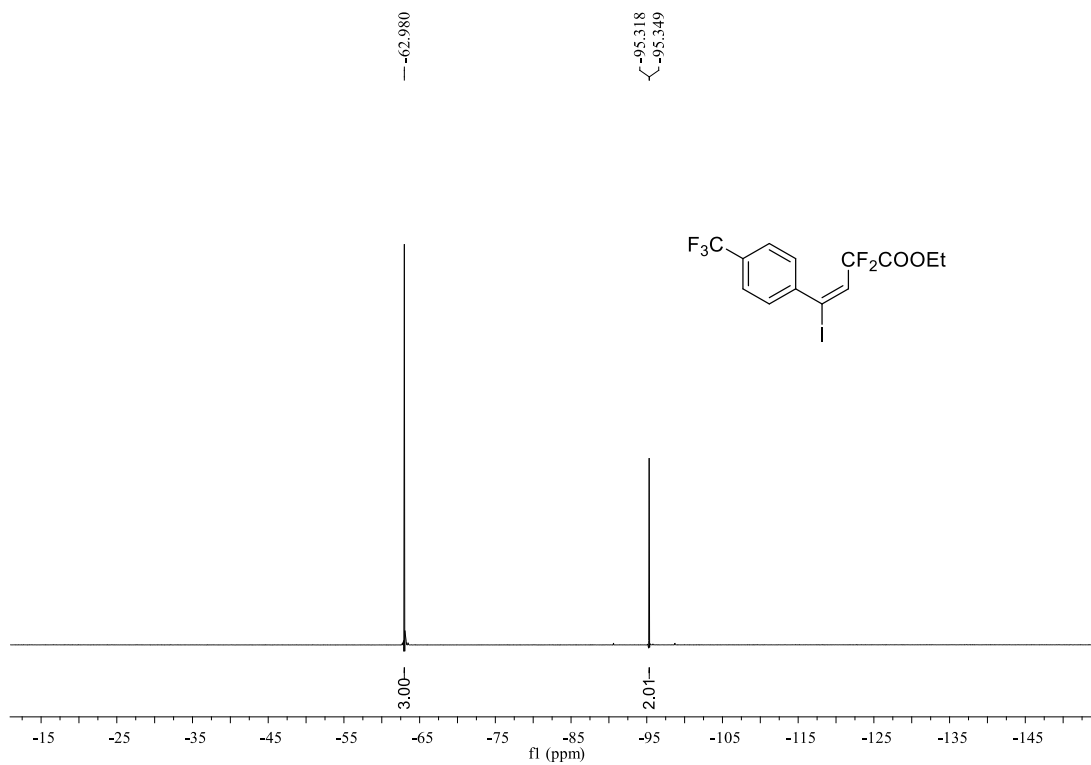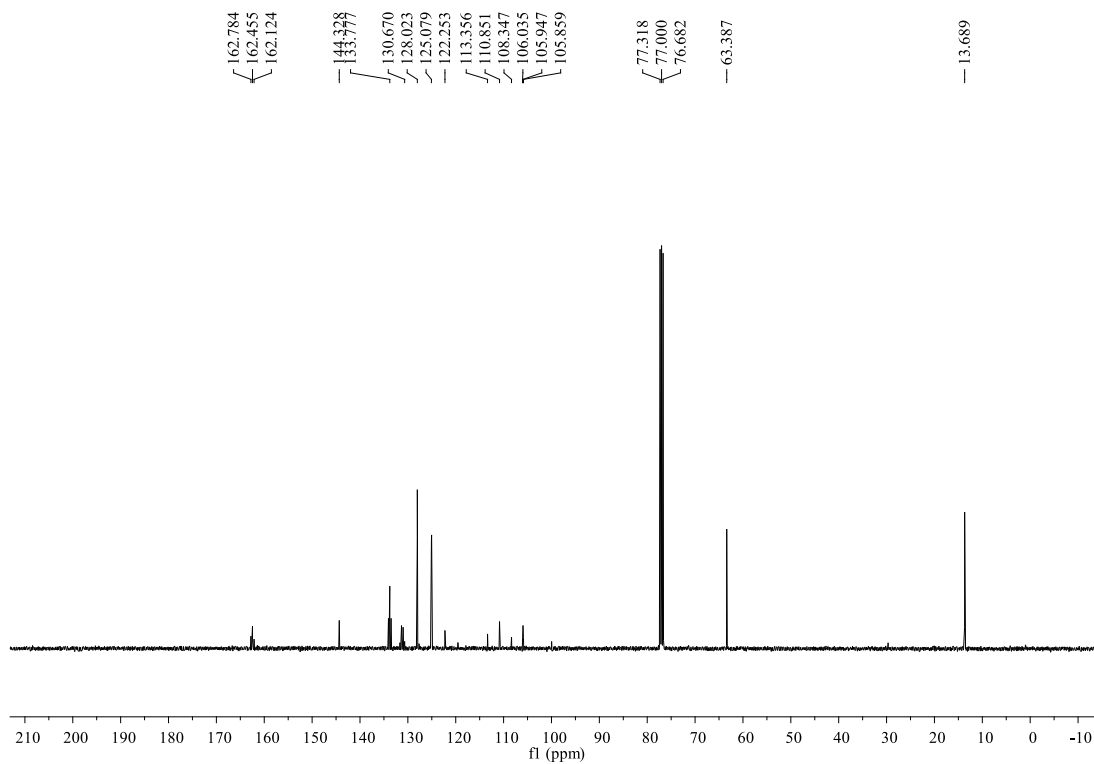

**Ethyl (E)-2,2-difluoro-4-iodo-4-(3-nitrophenyl)but-3-enoate (5g).**

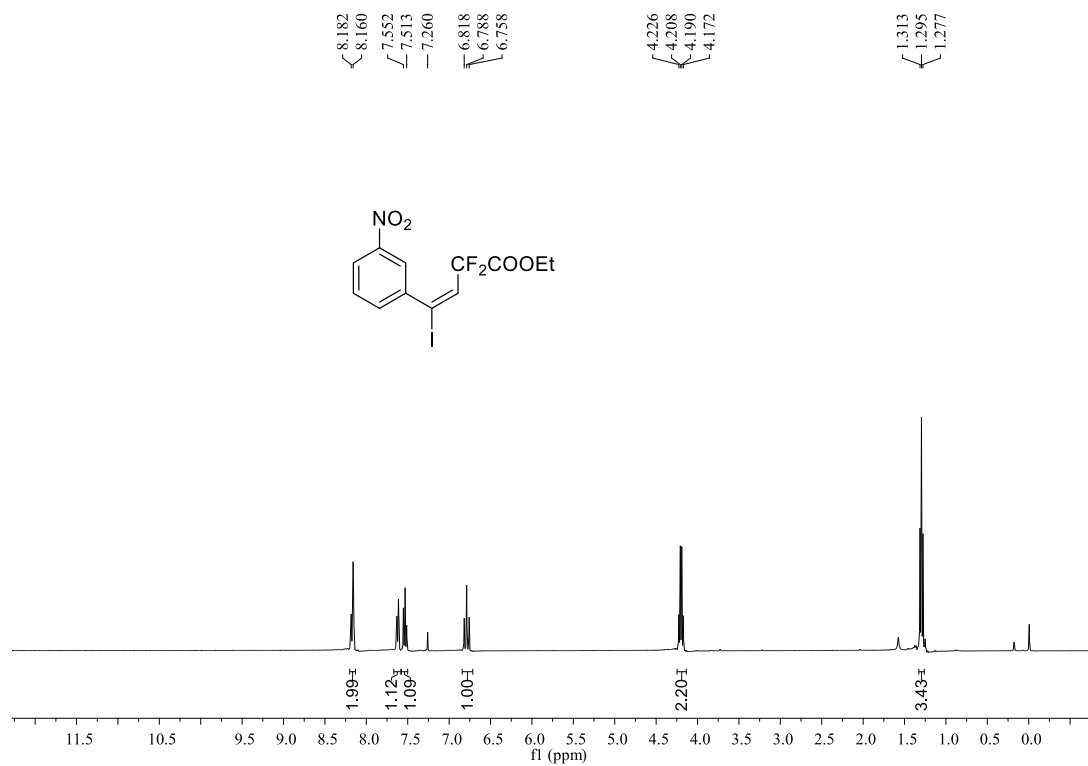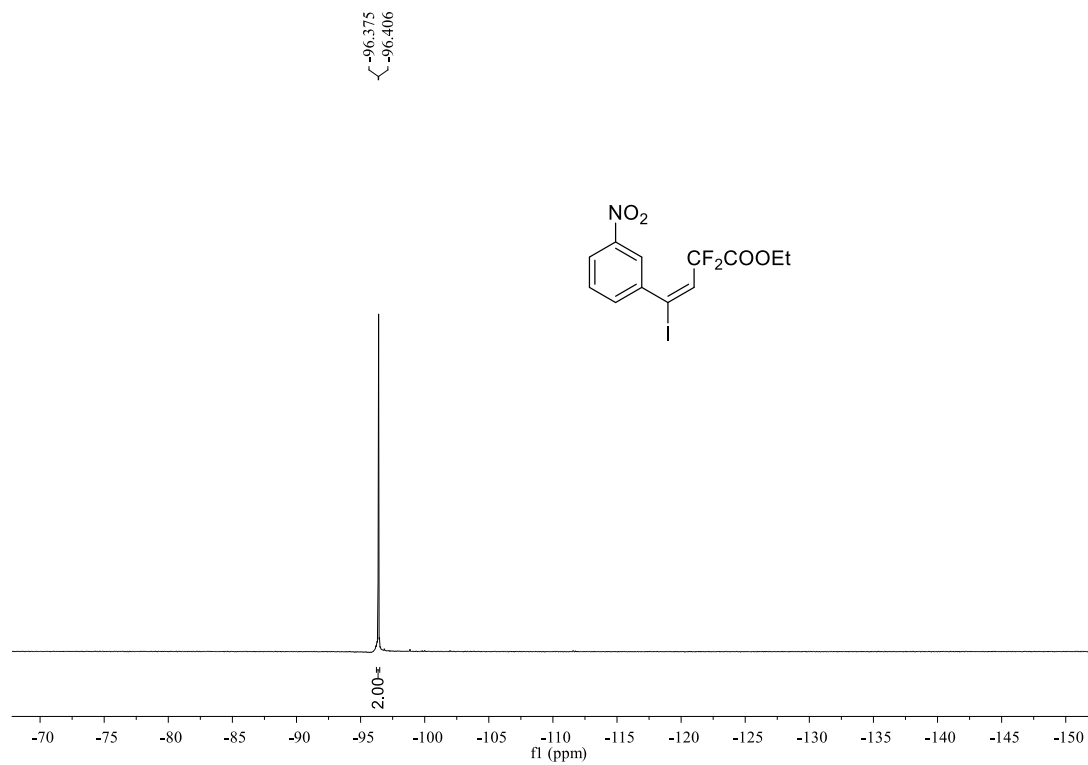



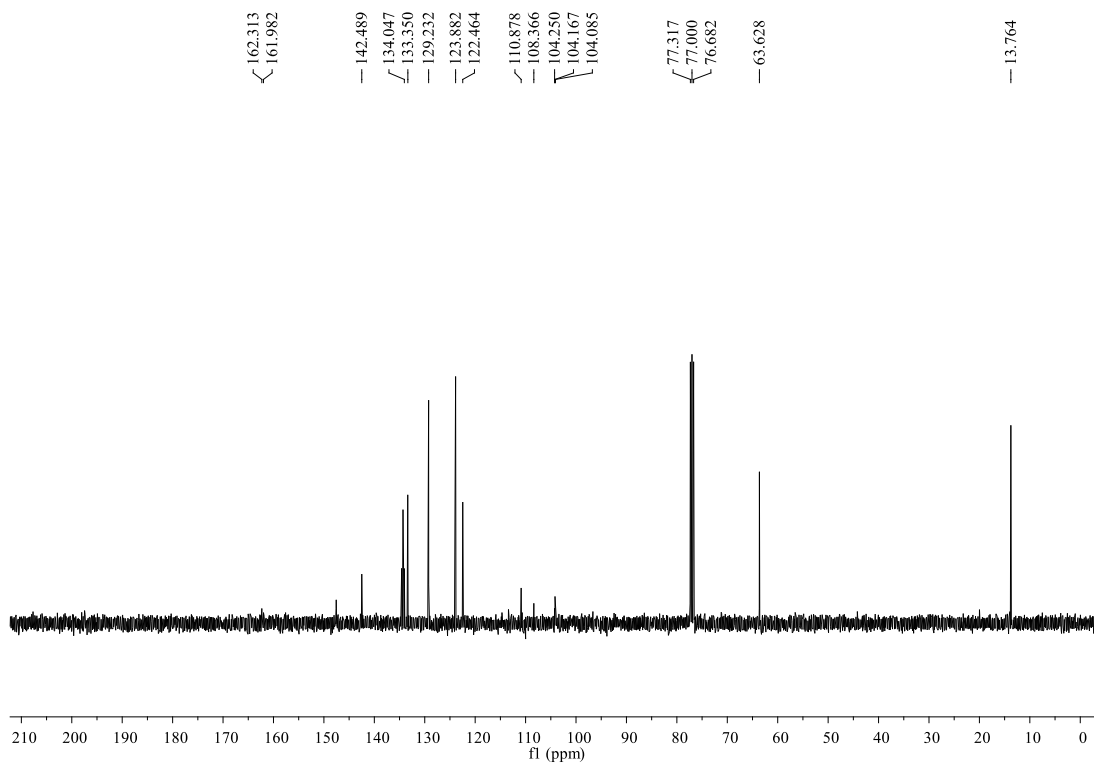

**(E)-1-methoxy-4-(3,3,4,4,5,5,6,6,6-nonafluoro-1-iodohex-1-en-1-yl)benzene (5h).**

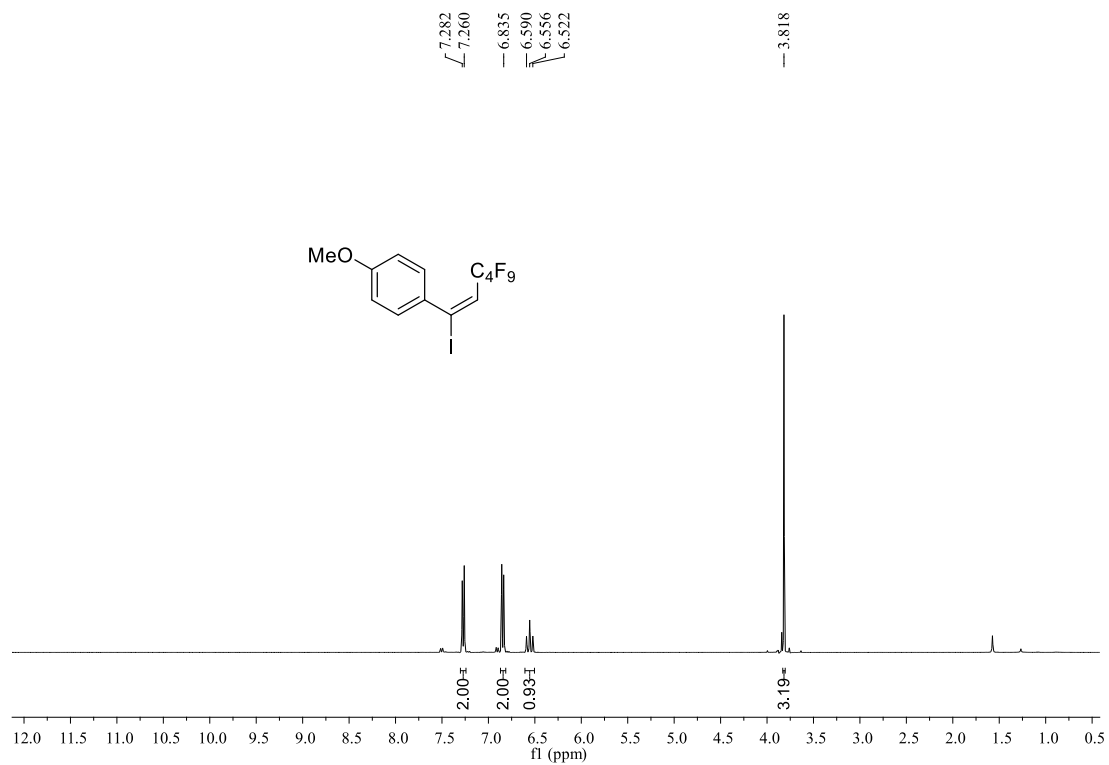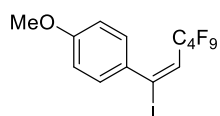

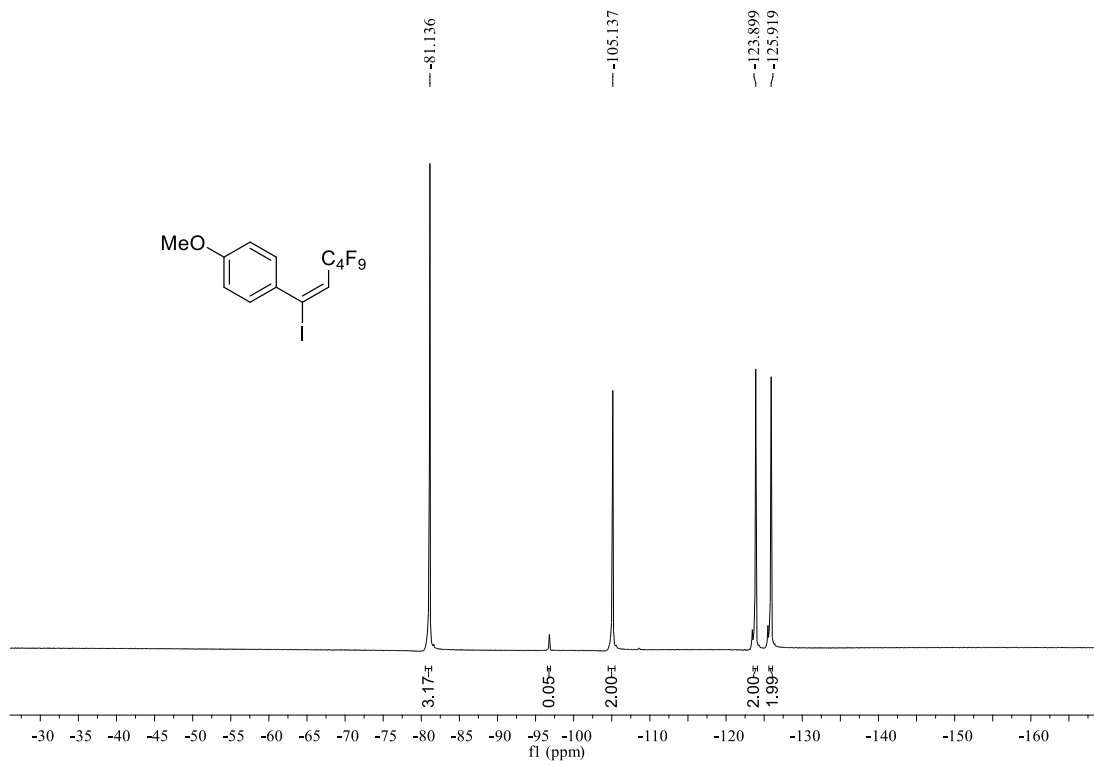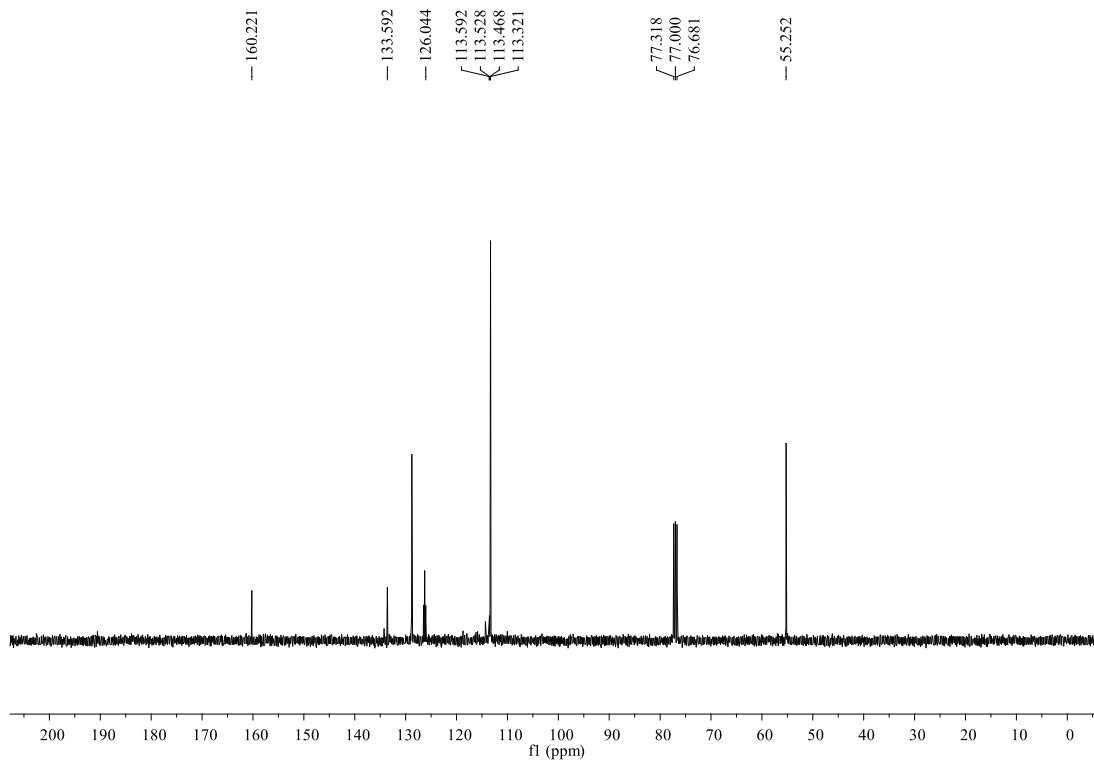

**(E)-1-methoxy-4-(3,3,4,4,5,5,6,6,7,7,8,8,8-tridecafluoro-1-iodooct-1-en-1-yl) benzene (5i).**

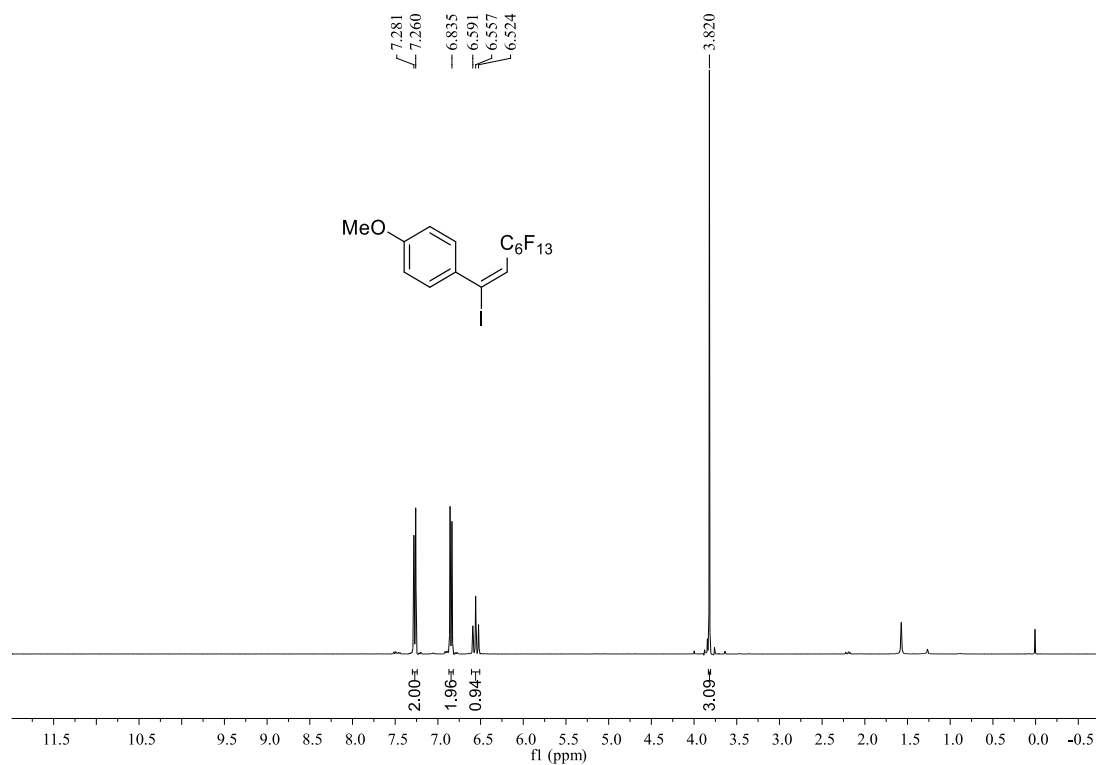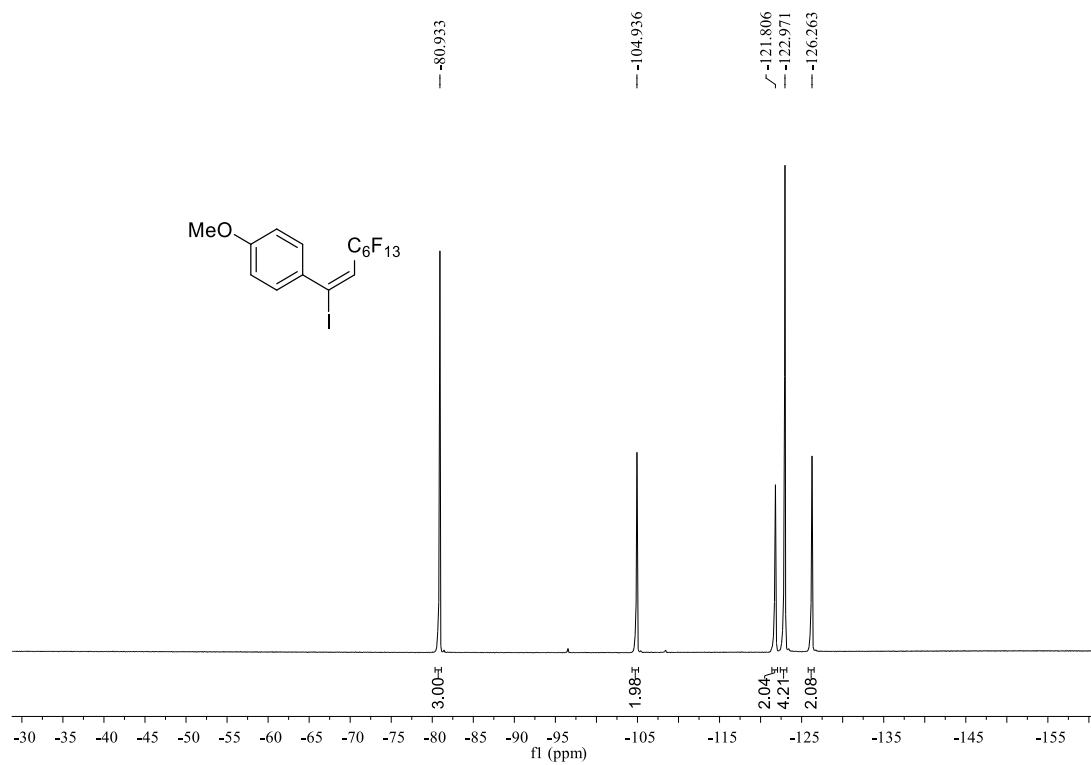

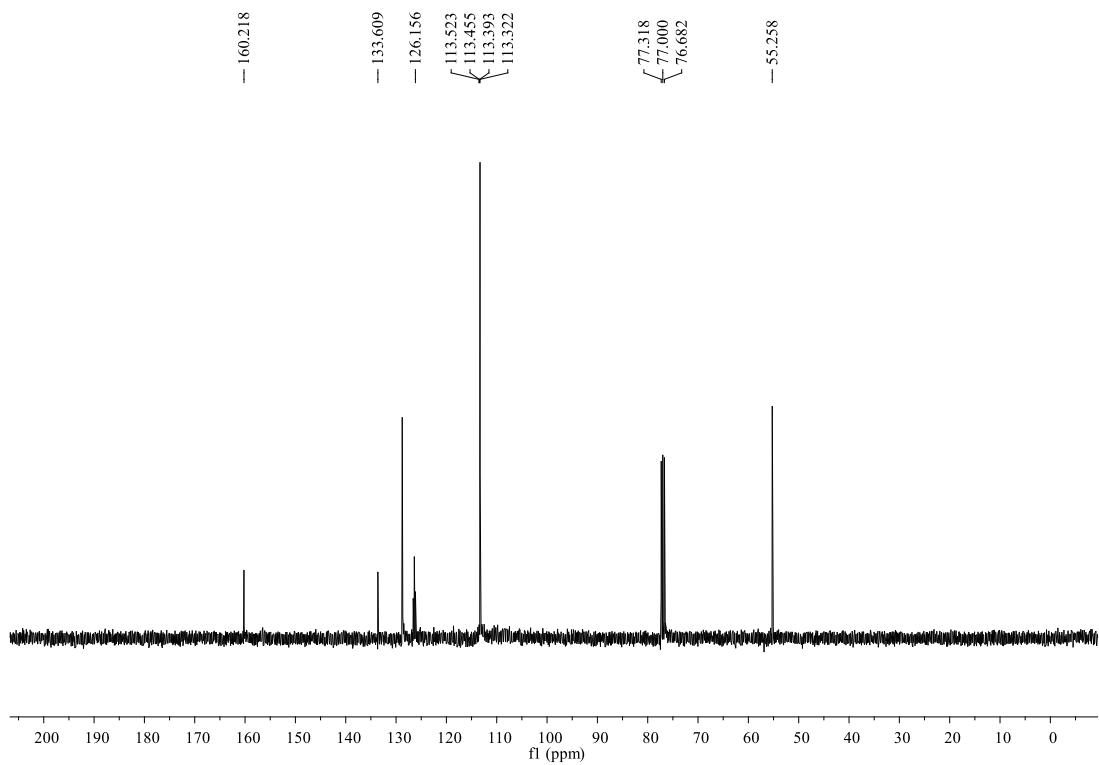

**(E)-1-methoxy-2-(3,3,4,4,5,5,6,6,7,7,8,8,8-tridecafluoro-1-iodooct-1-en-1-yl)benzene (5j).**

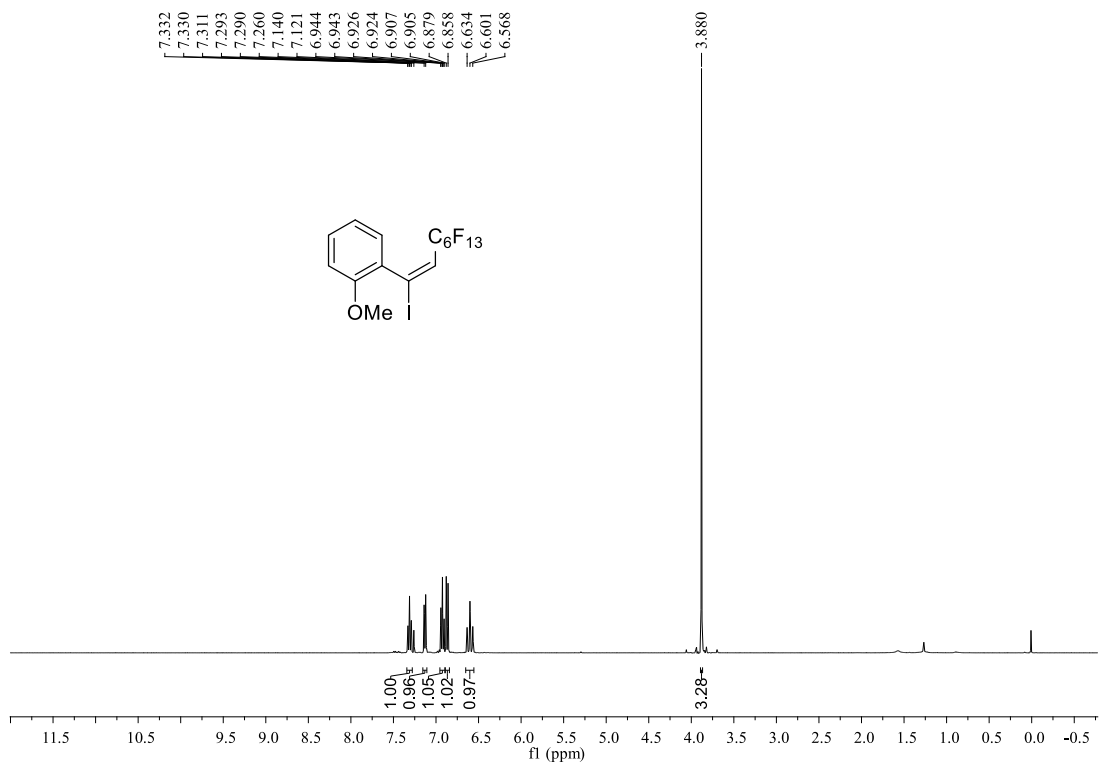

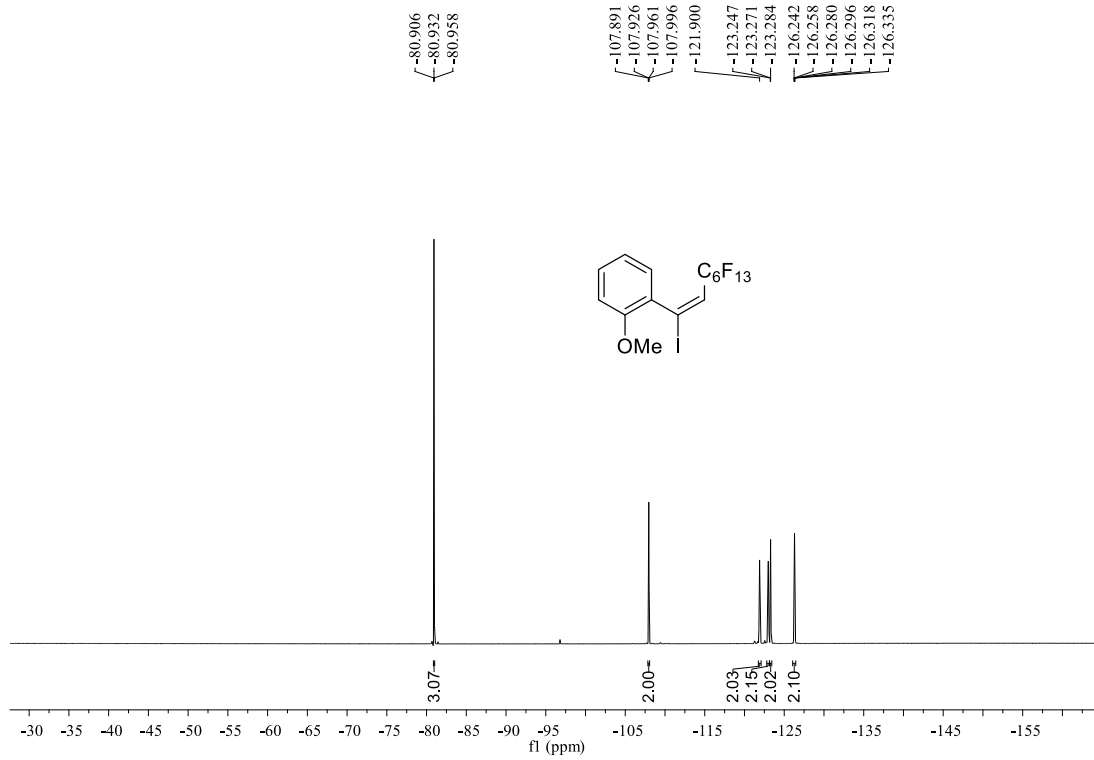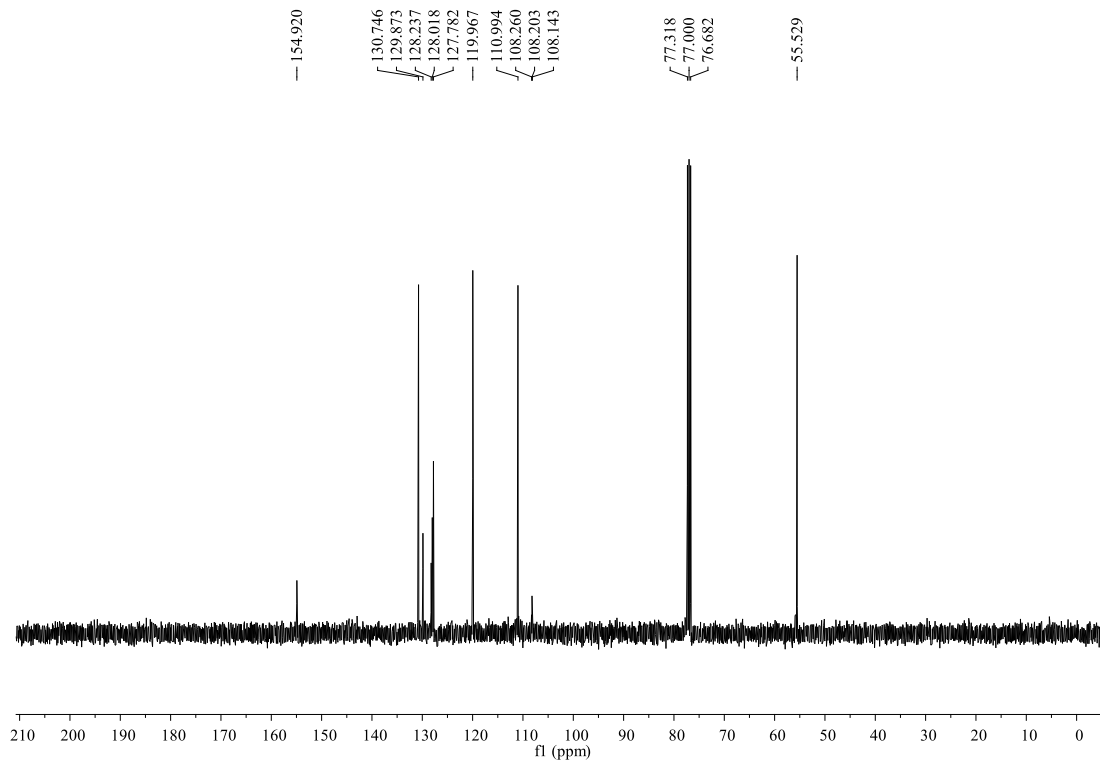

**(E)-1-chloro-6,6,7,7,8,8,9,9,10,10,11,11,11-tridecafluoro-4-iodoundec-4-ene (5k).**

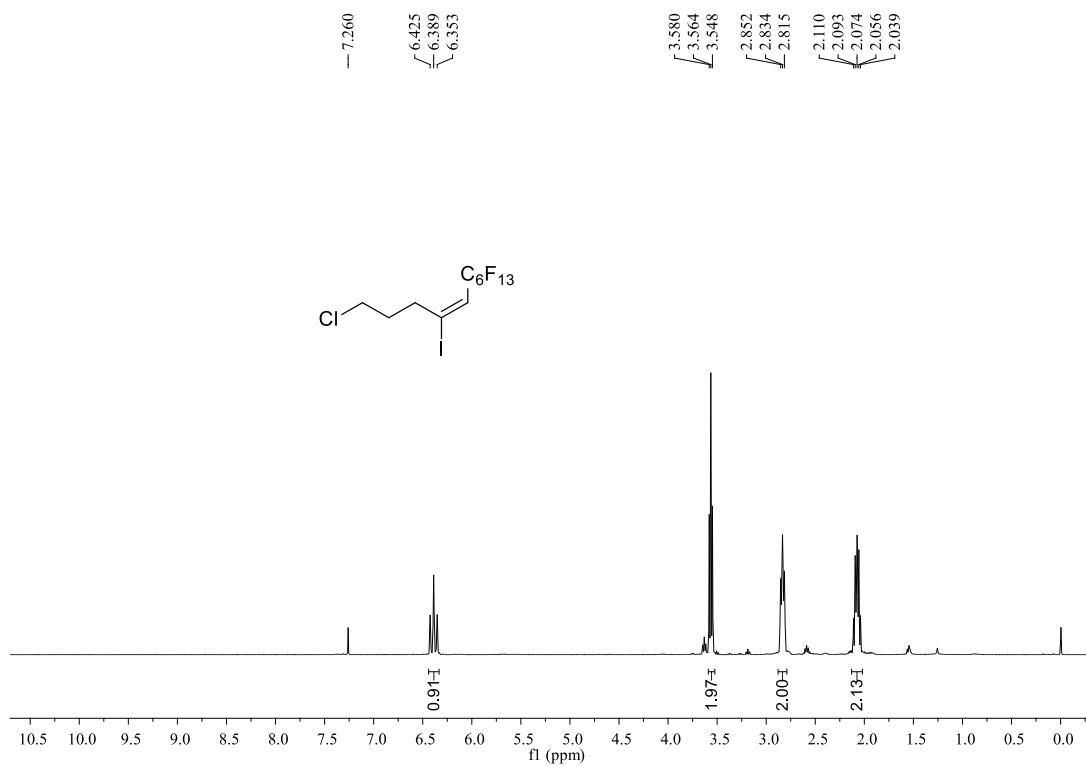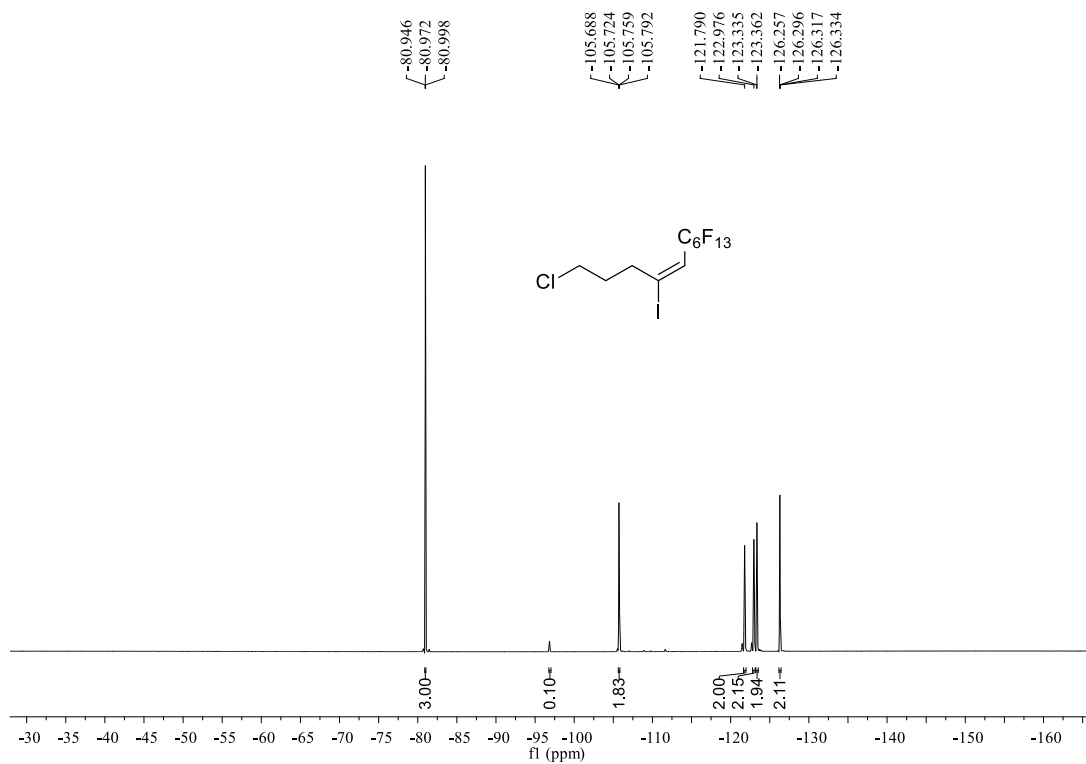

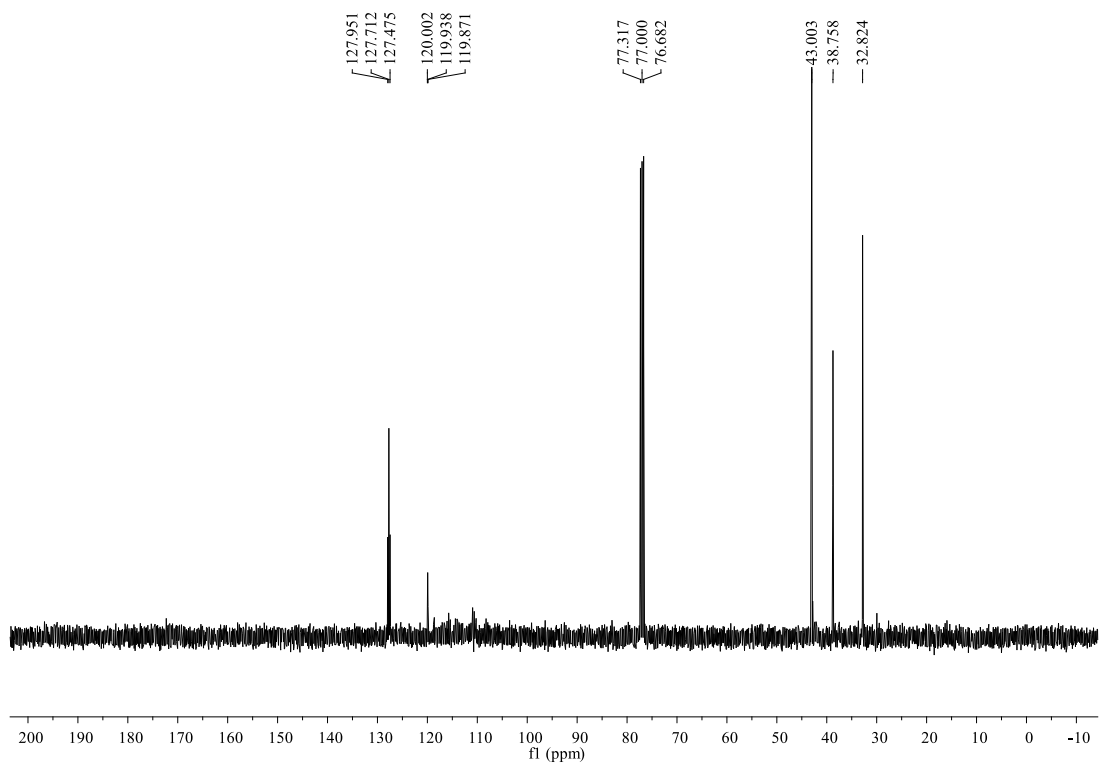

**Ethyl 2,2-difluoro-2-(2,4,6-trimethoxyphenyl)acetate (7a).**

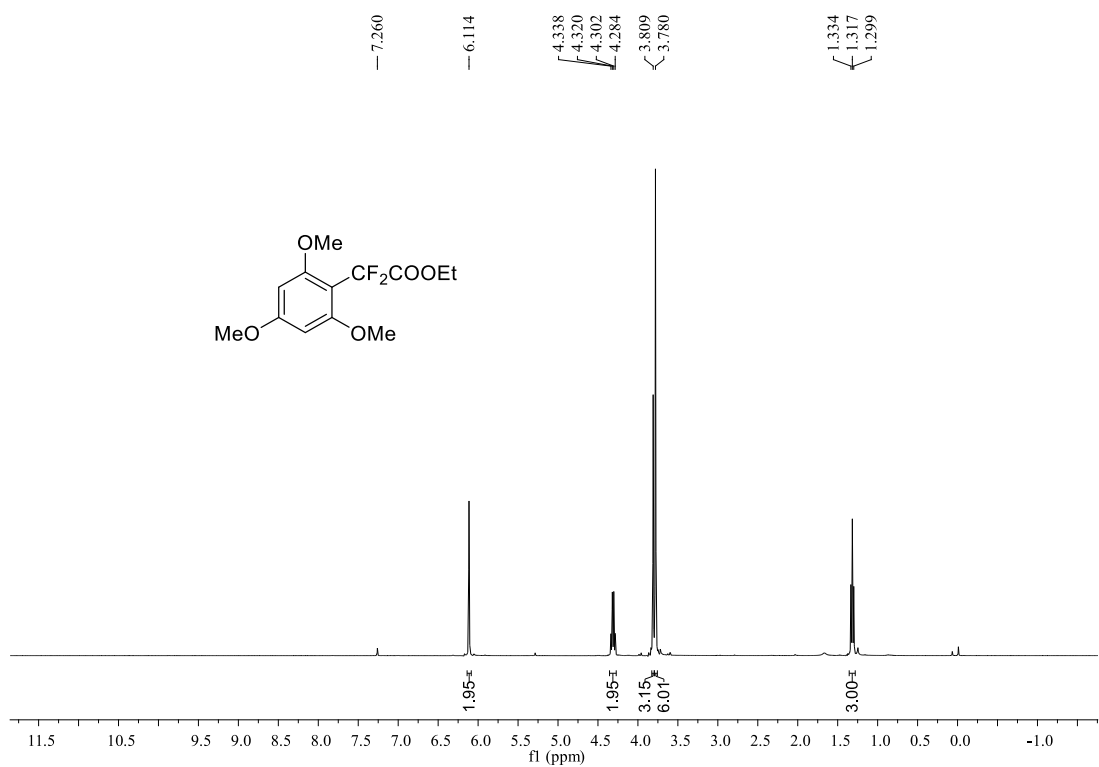

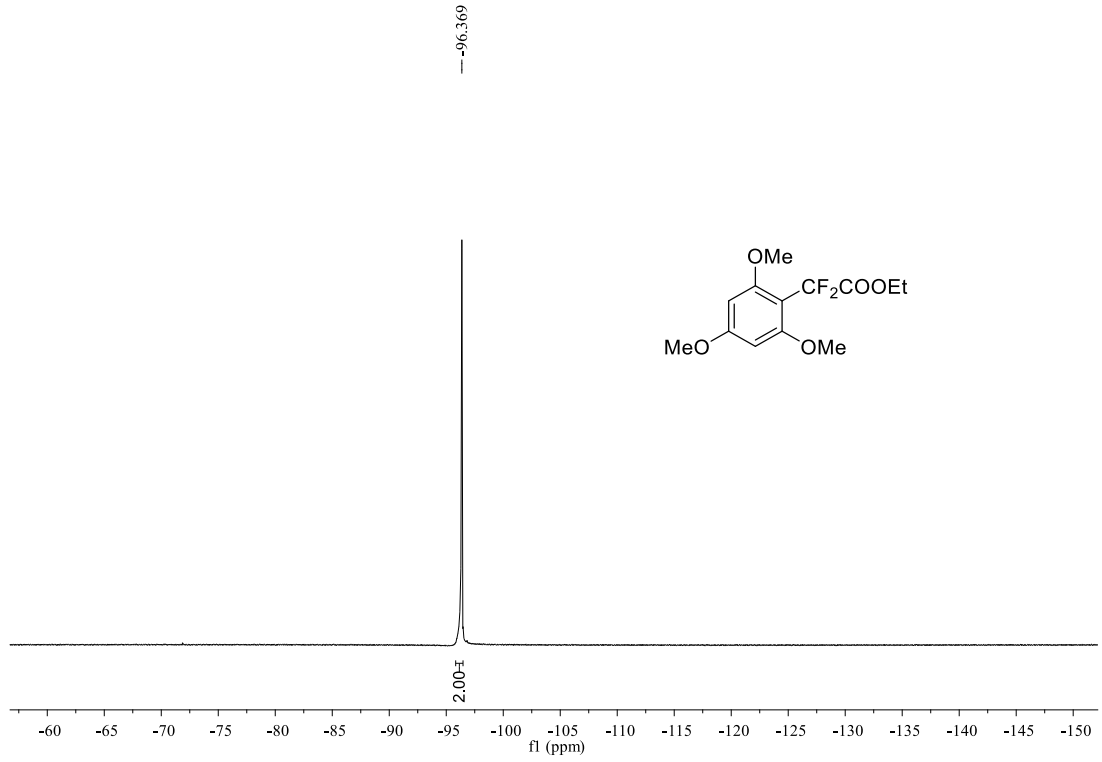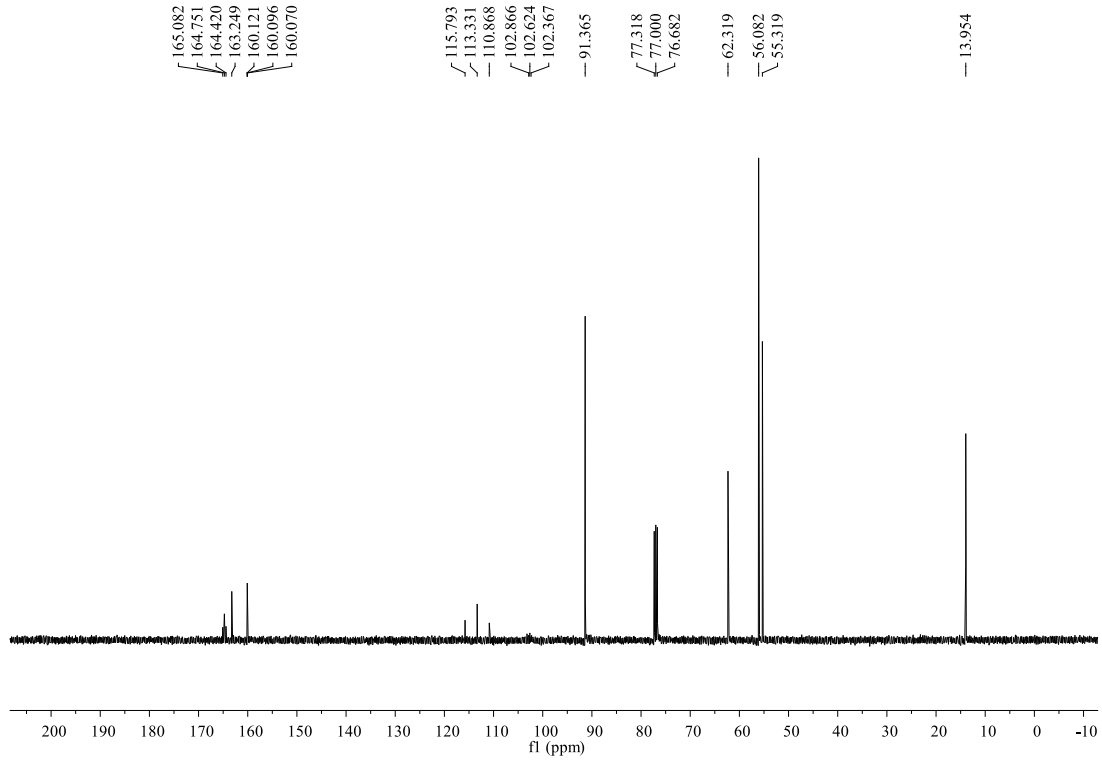



**Ethyl 2,2-difluoro-2-(5-methylfuran-2-yl)acetate (7b).**

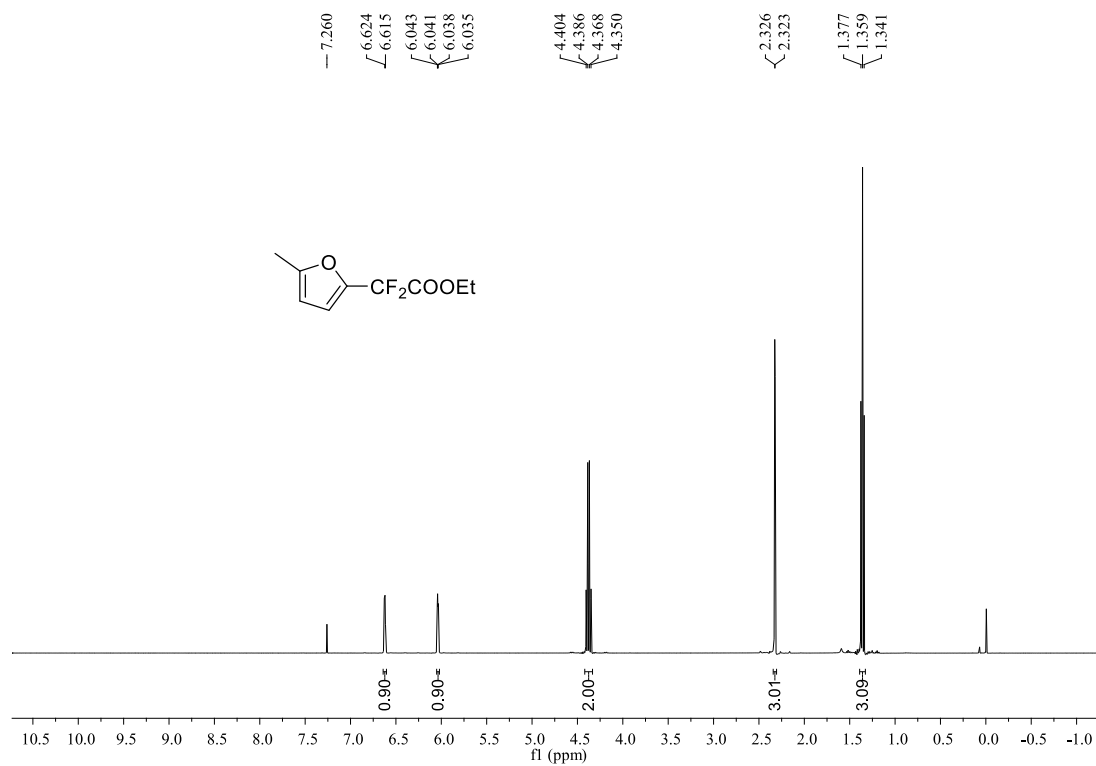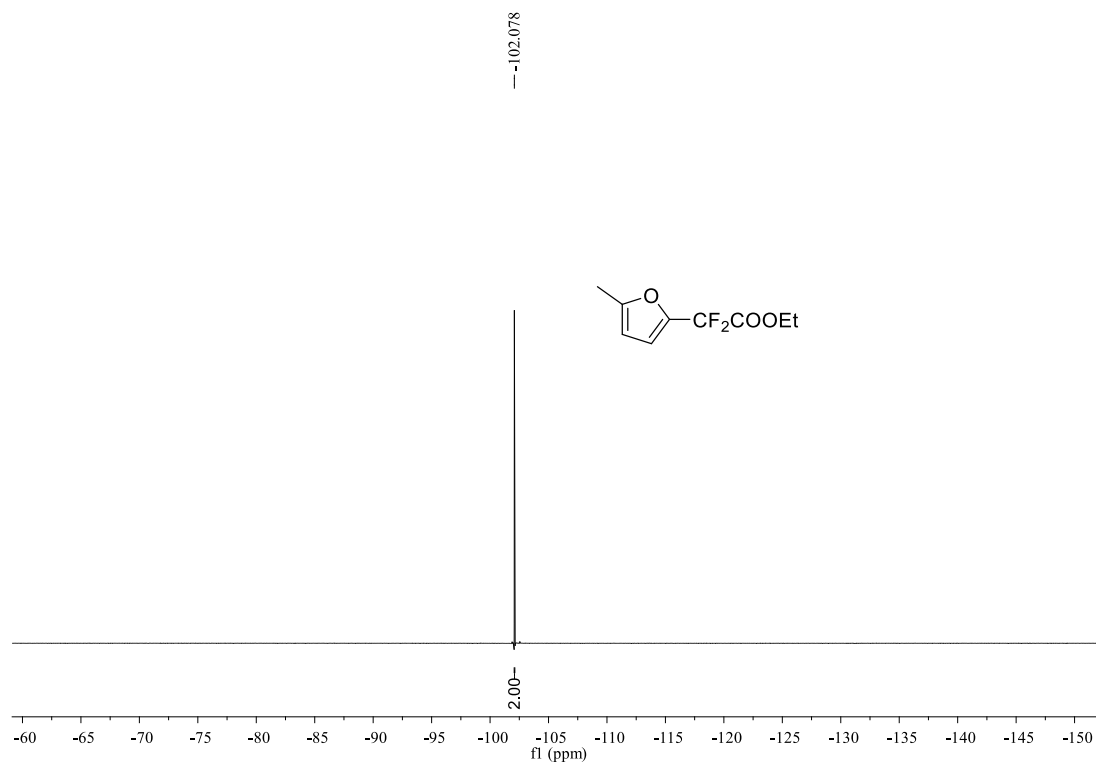

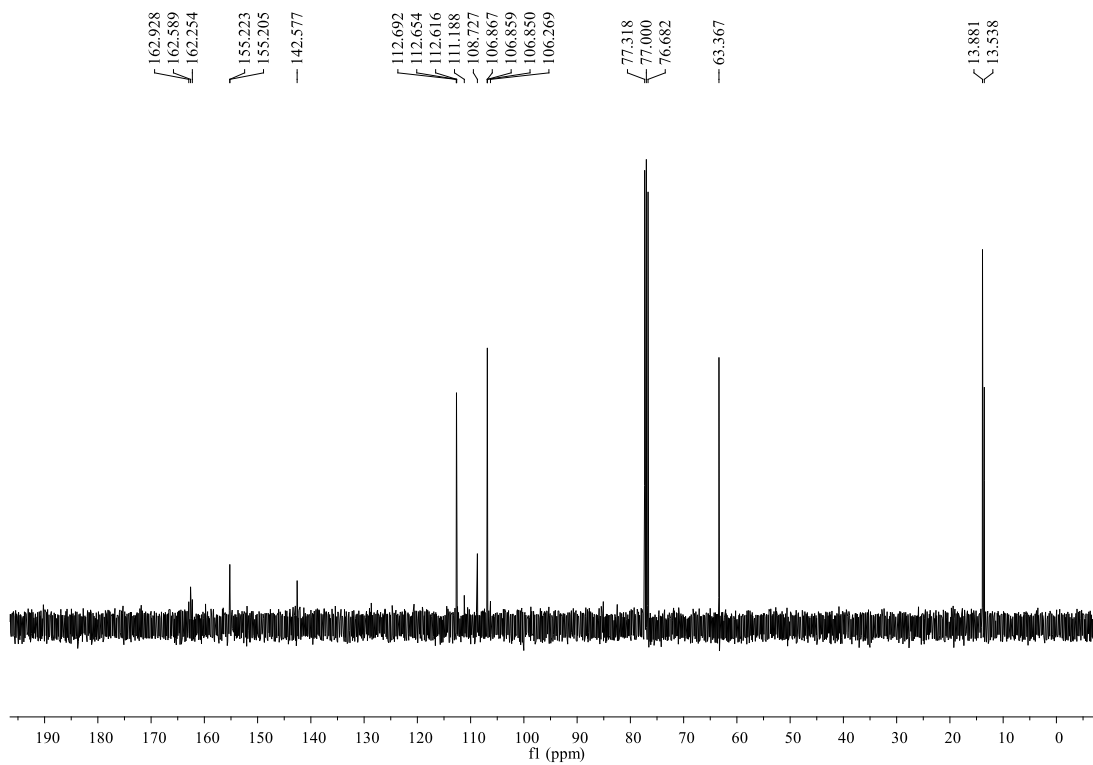

**Ethyl 2,2-difluoro-2-(5-methylthiophen-2-yl)acetate (7c).**

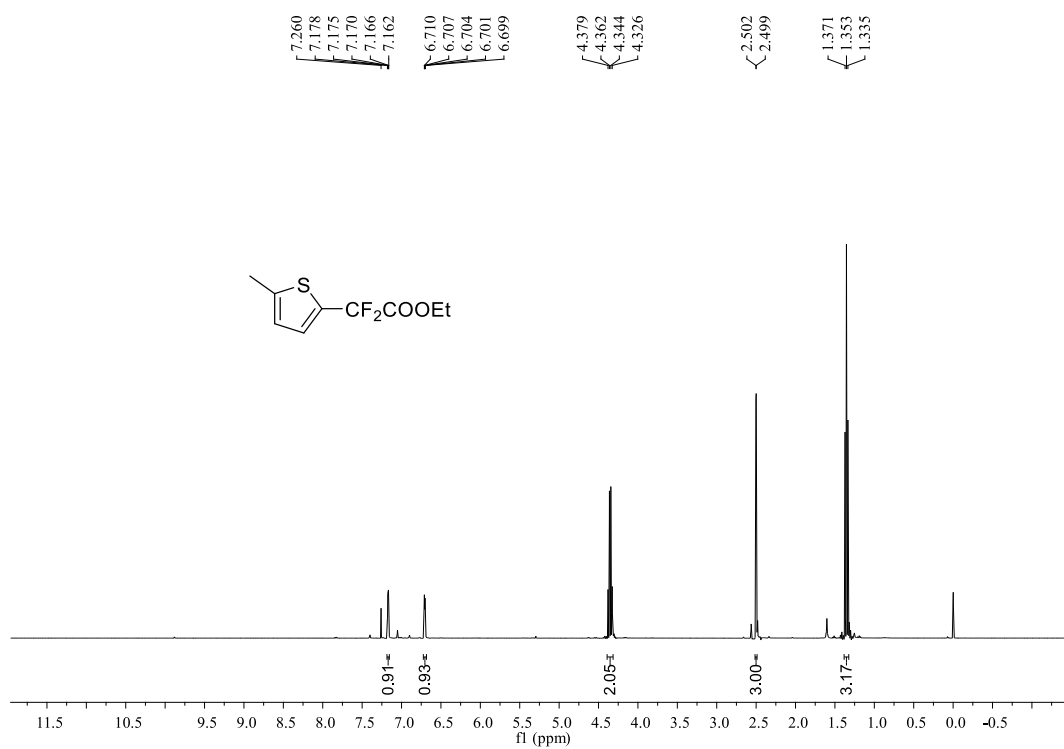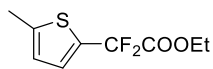

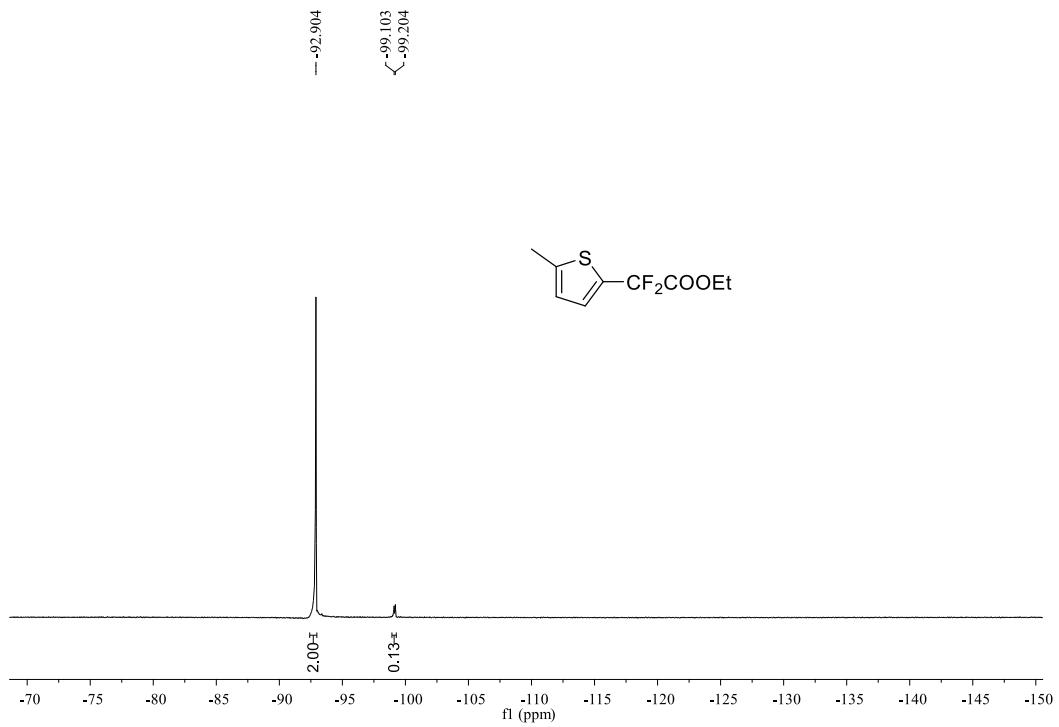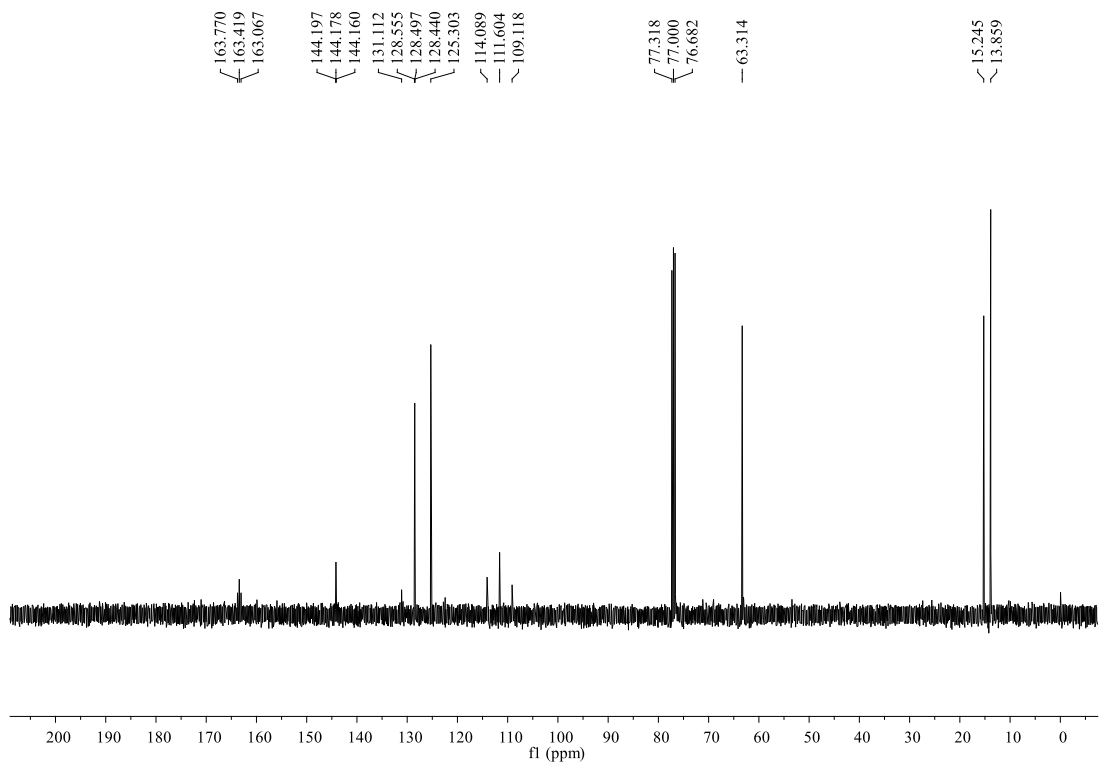

**Ethyl 2,2-difluoro-2-(5-hexylthiophen-2-yl)acetate (7d).**

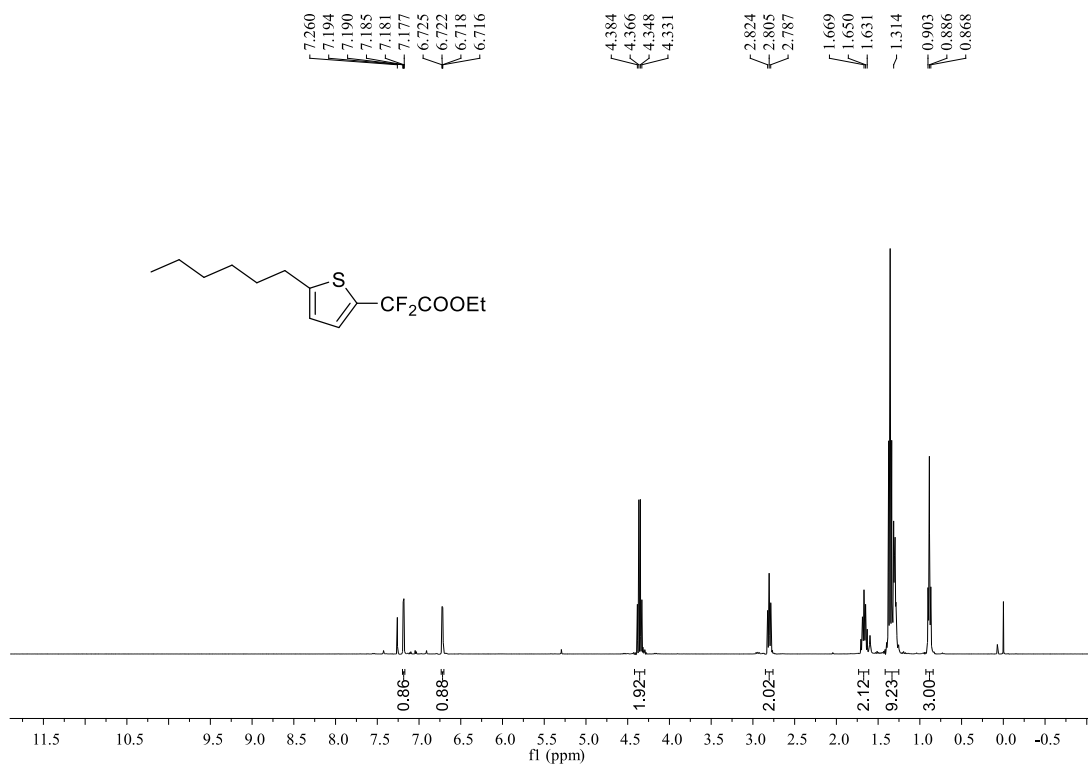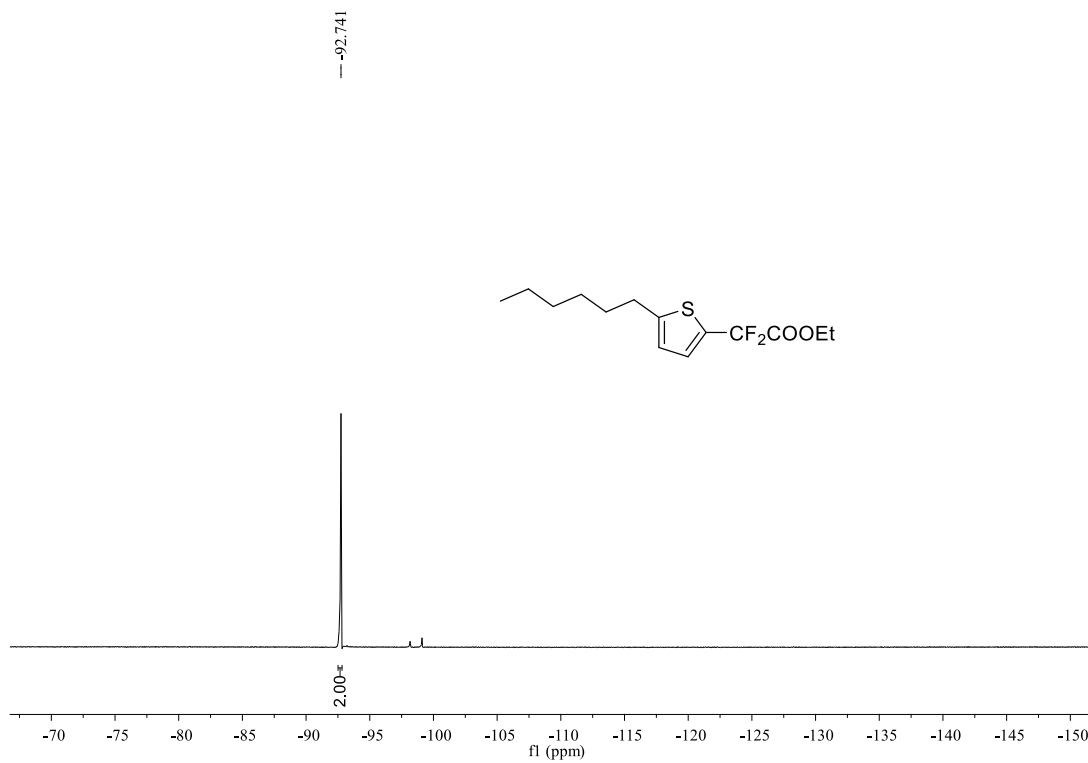

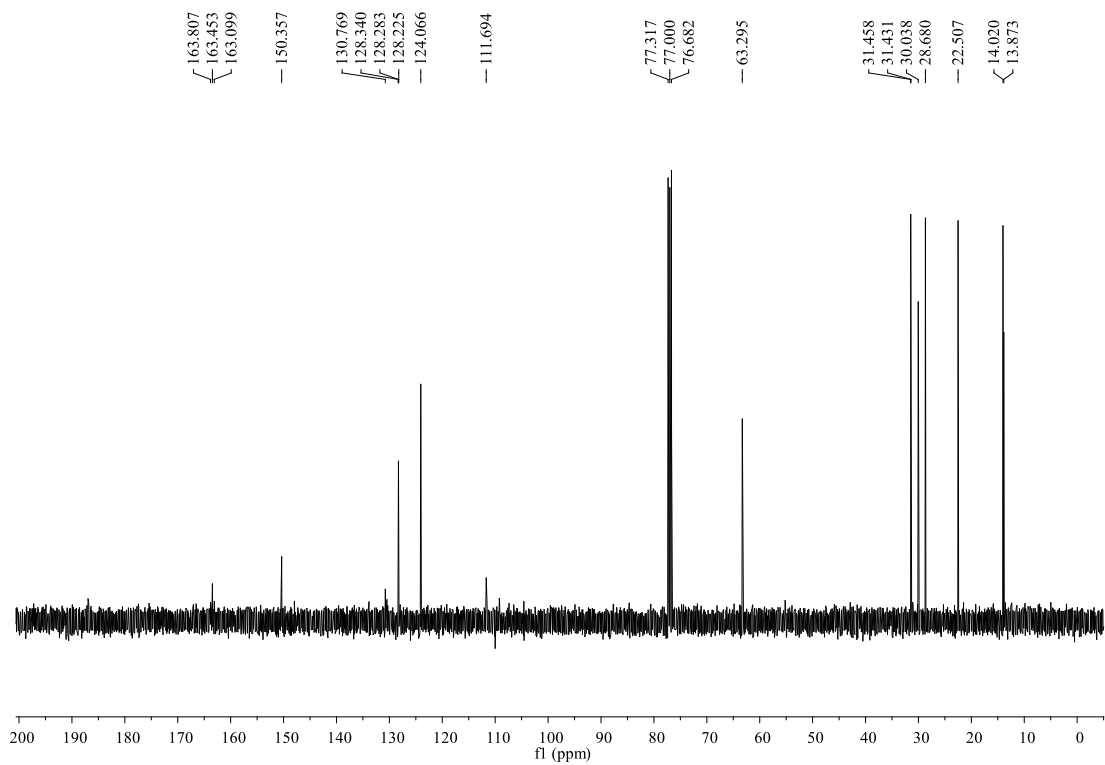

**Ethyl 2,2-difluoro-2-(1-methyl-1H-indol-2-yl)acetate (7e).**

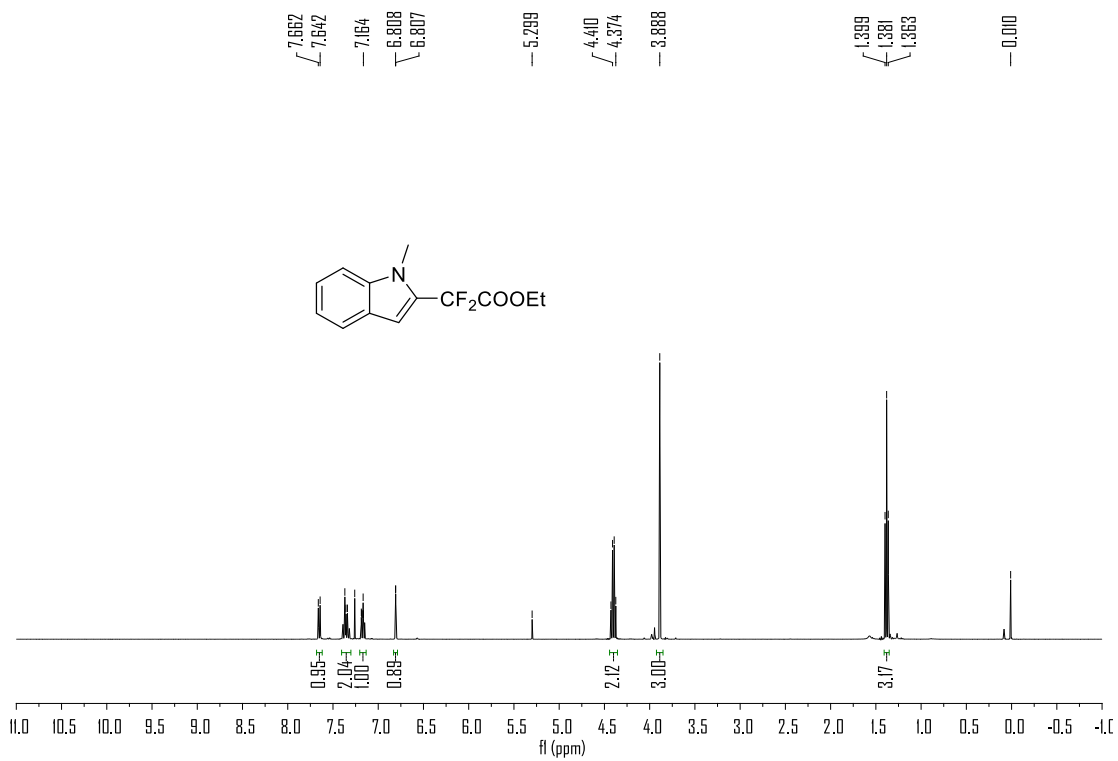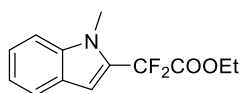

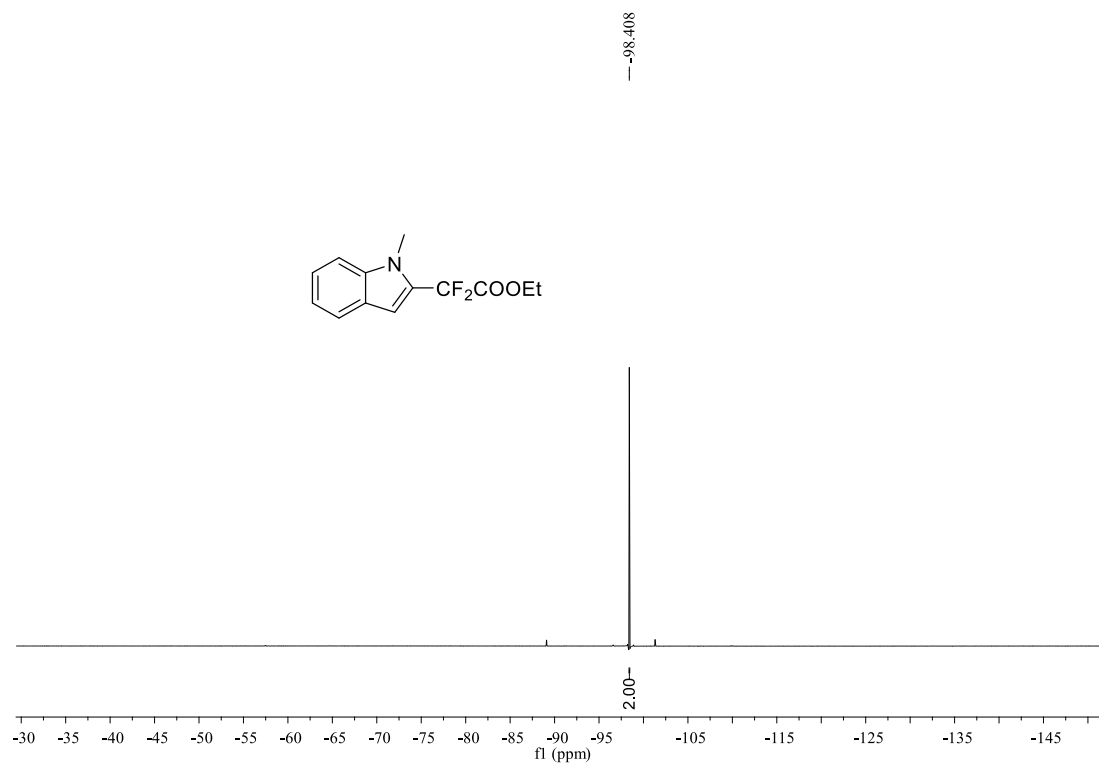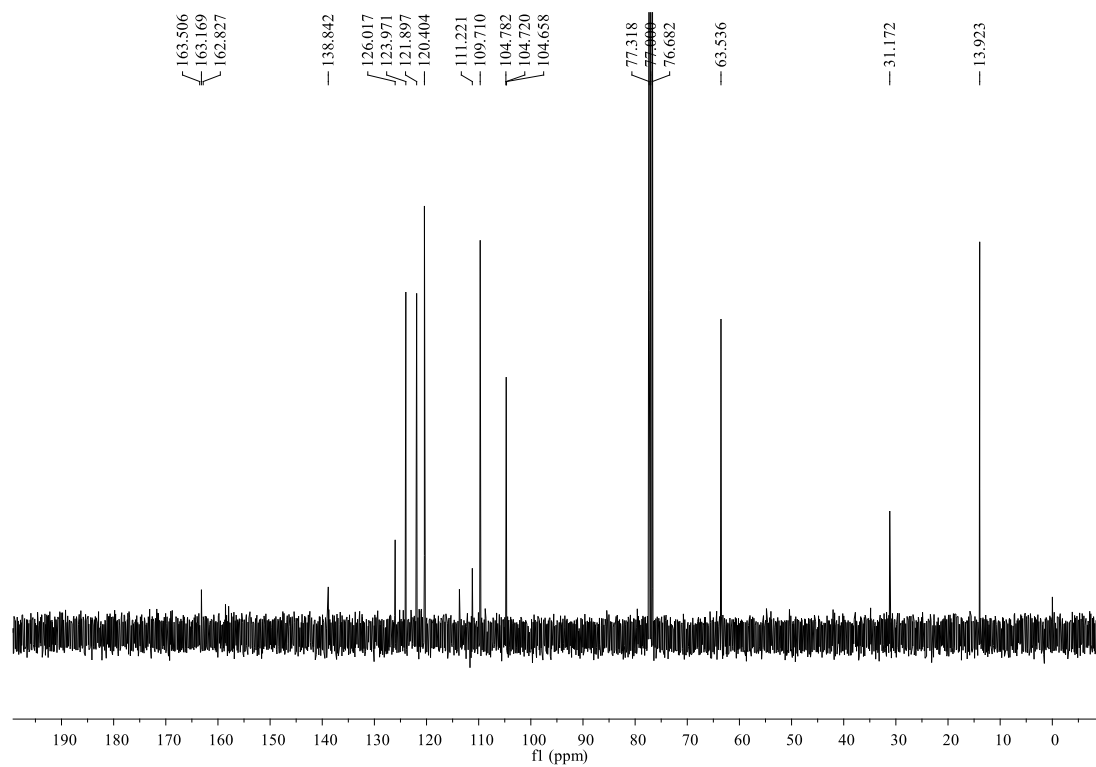

**Ethyl 2,2-difluoro-2-(2-oxo-2H-chromen-3-yl)acetate (7f).**

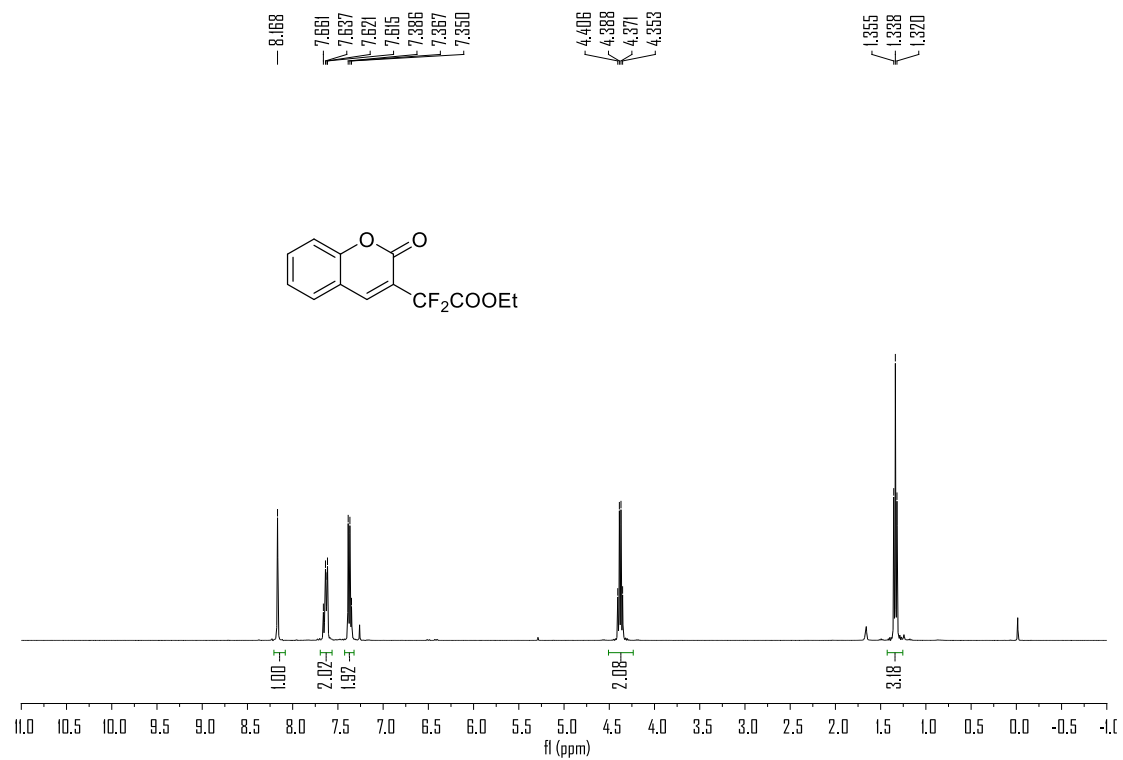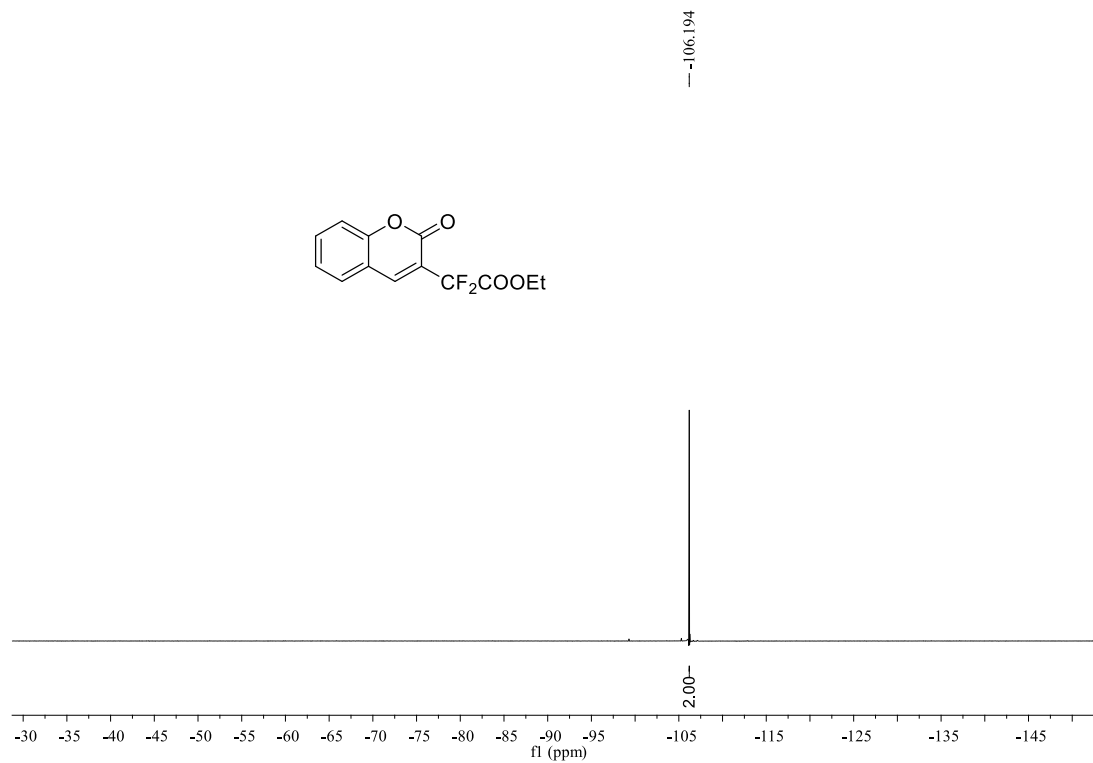

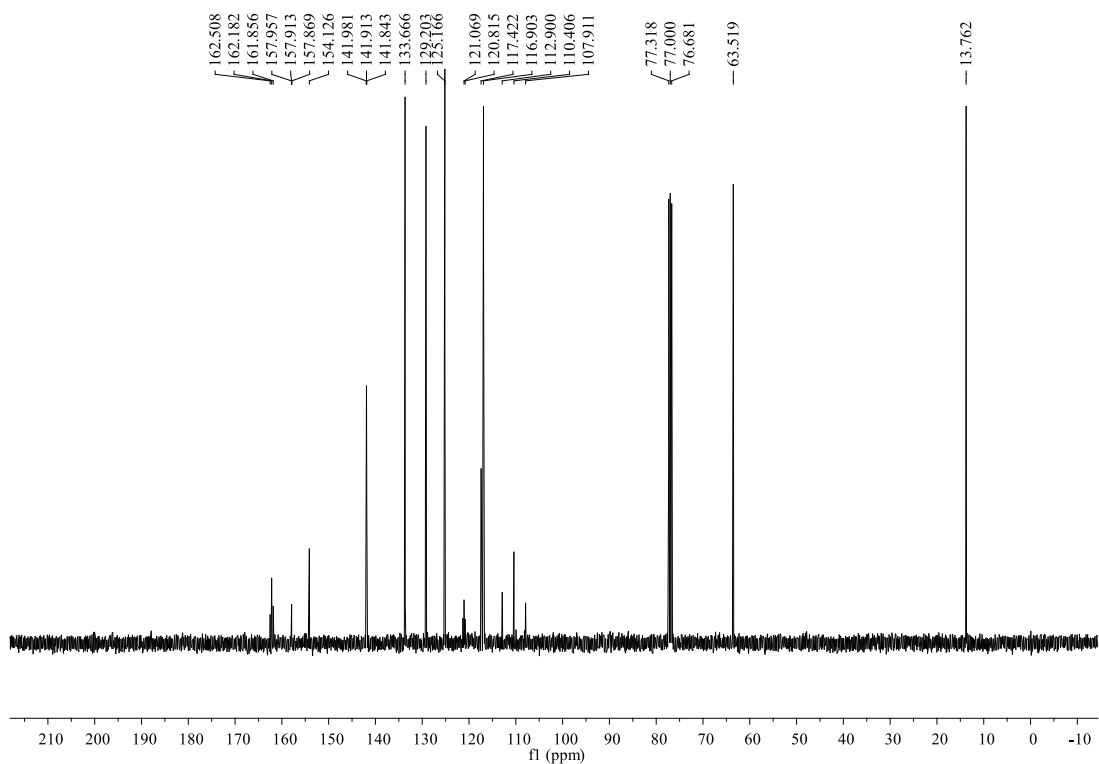

**Ethyl 2,2-difluoro-2-(7-methoxy-2-oxo-2H-chromen-3-yl)acetate (7g).**

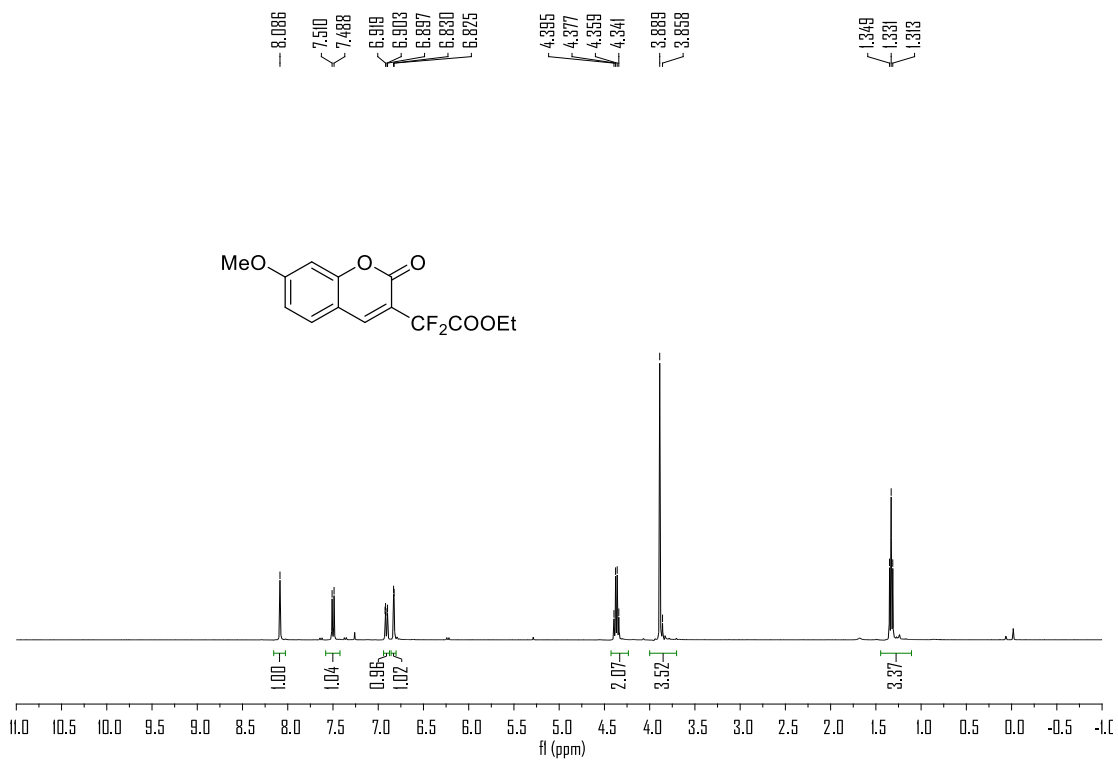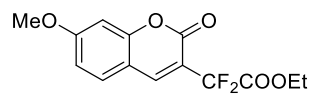



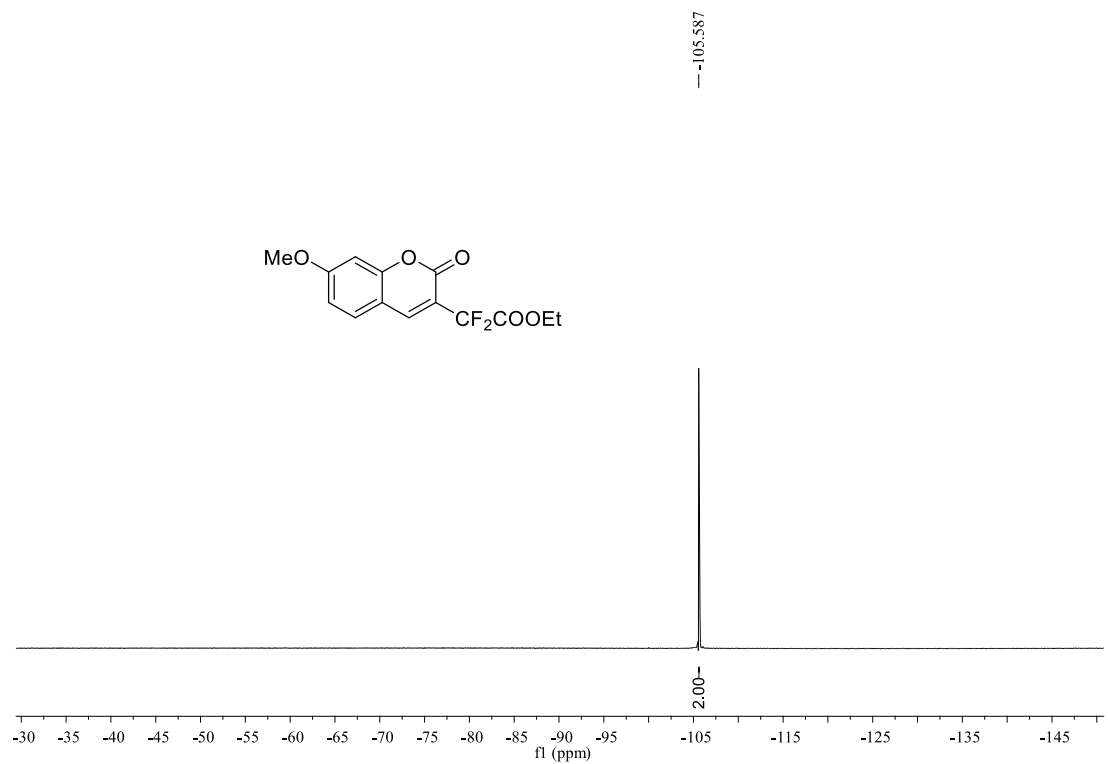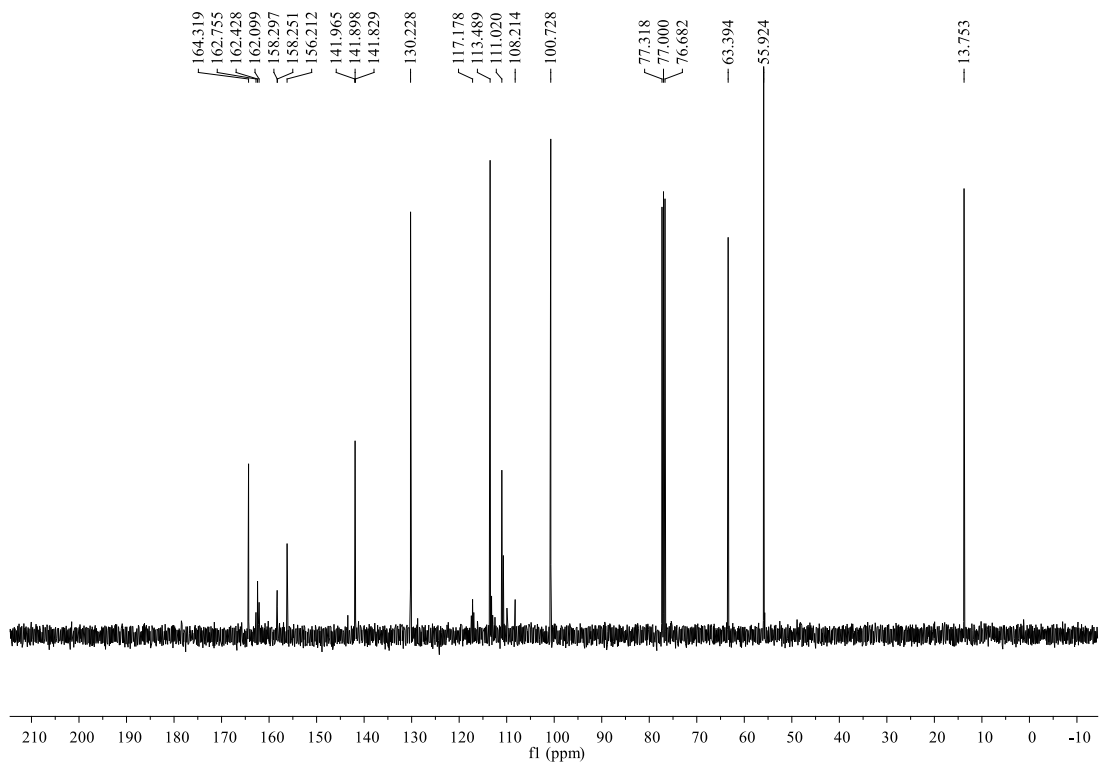

**Ethyl 2-(7-(diethylamino)-4-methyl-2-oxo-2H-chromen-3-yl)-2,2-difluoroacetate (7h).**

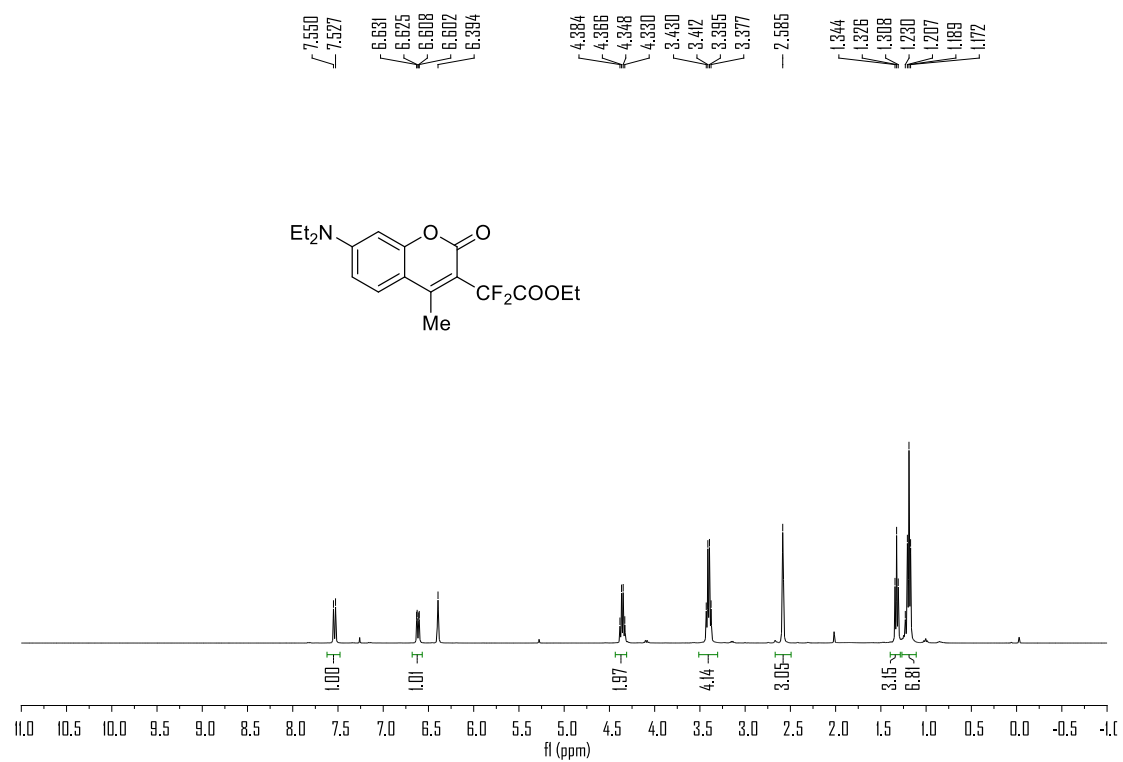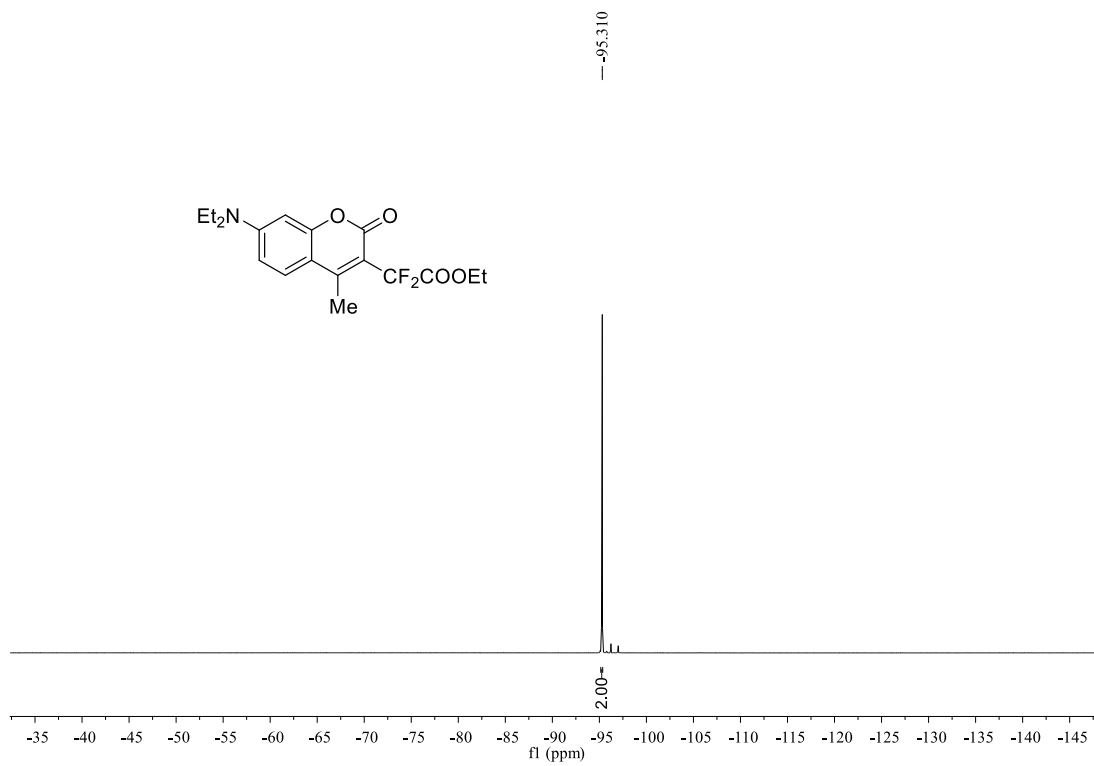

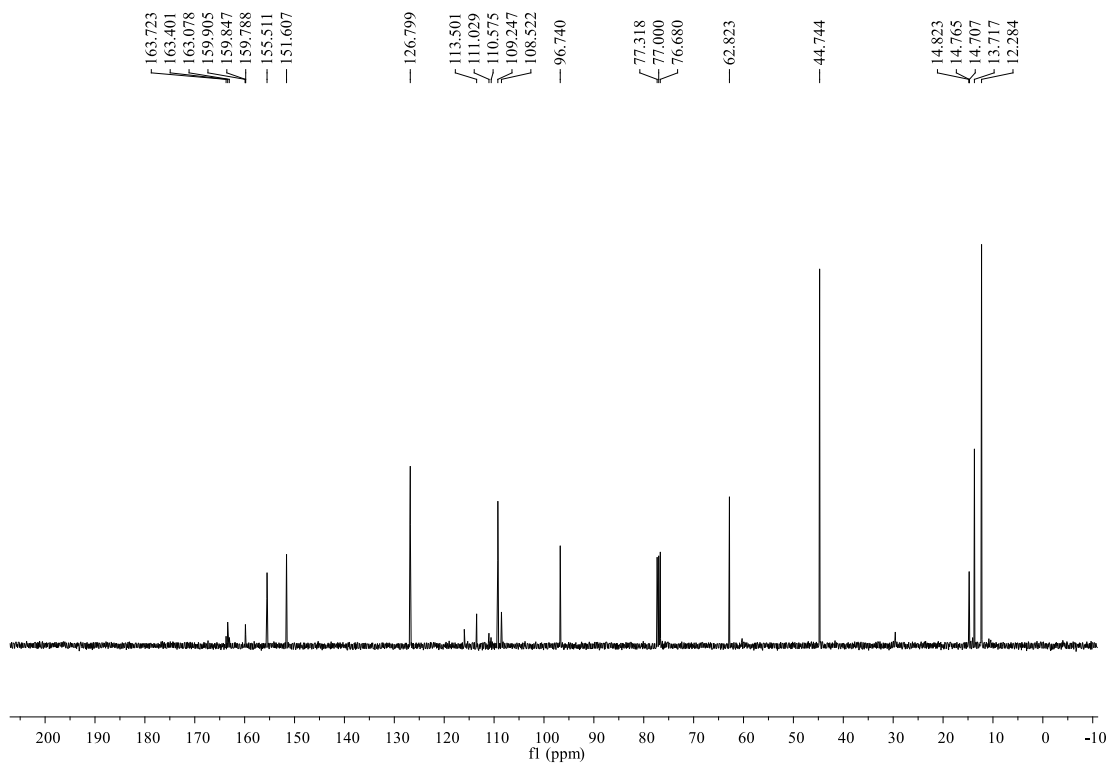

**7-(diethylamino)-4-methyl-3-(perfluorobutyl)-2H-chromen-2-one (7i).**

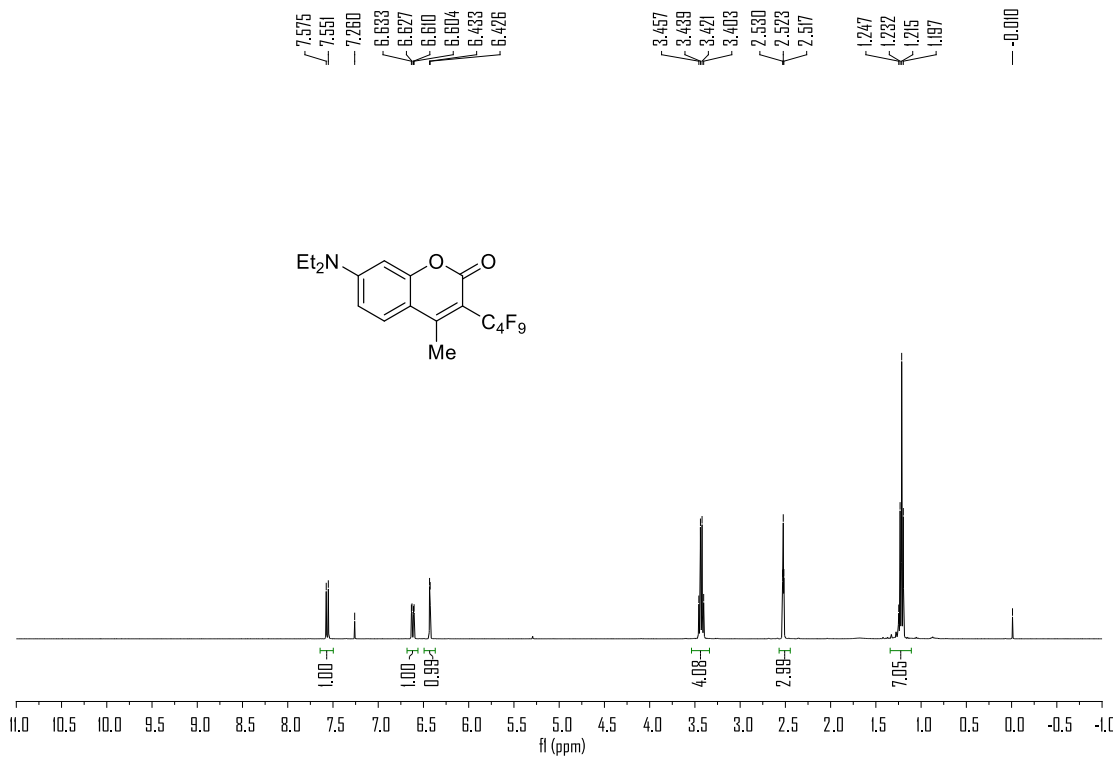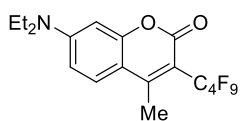

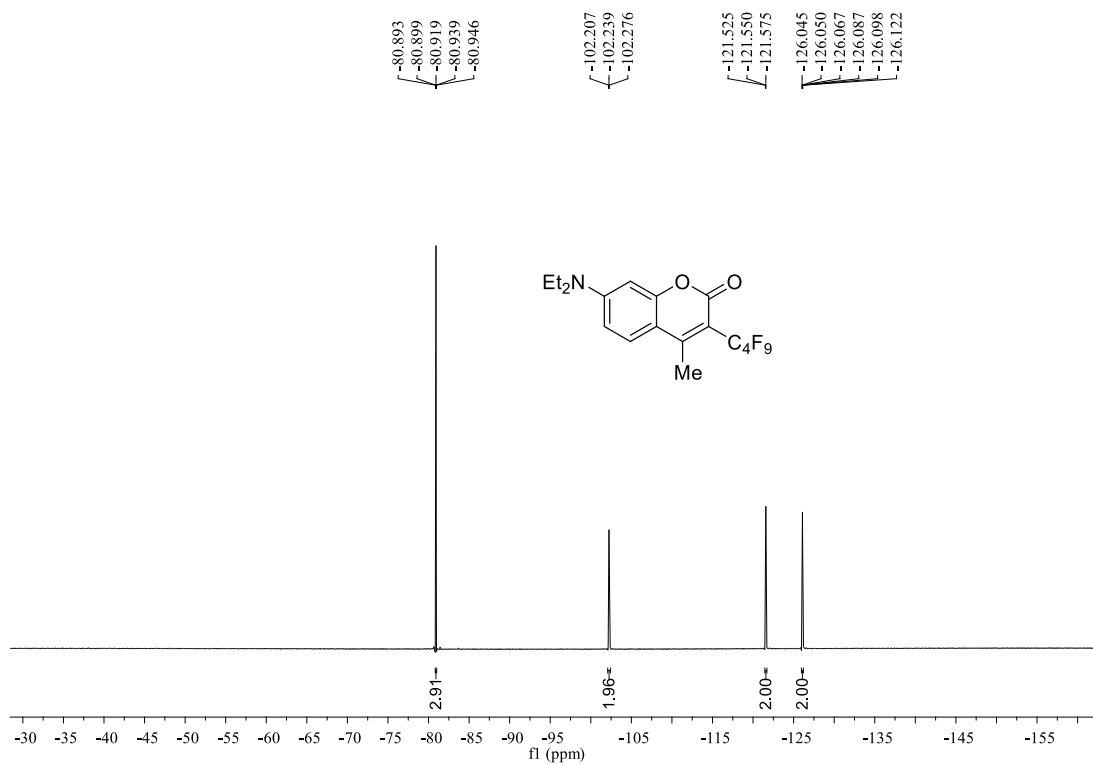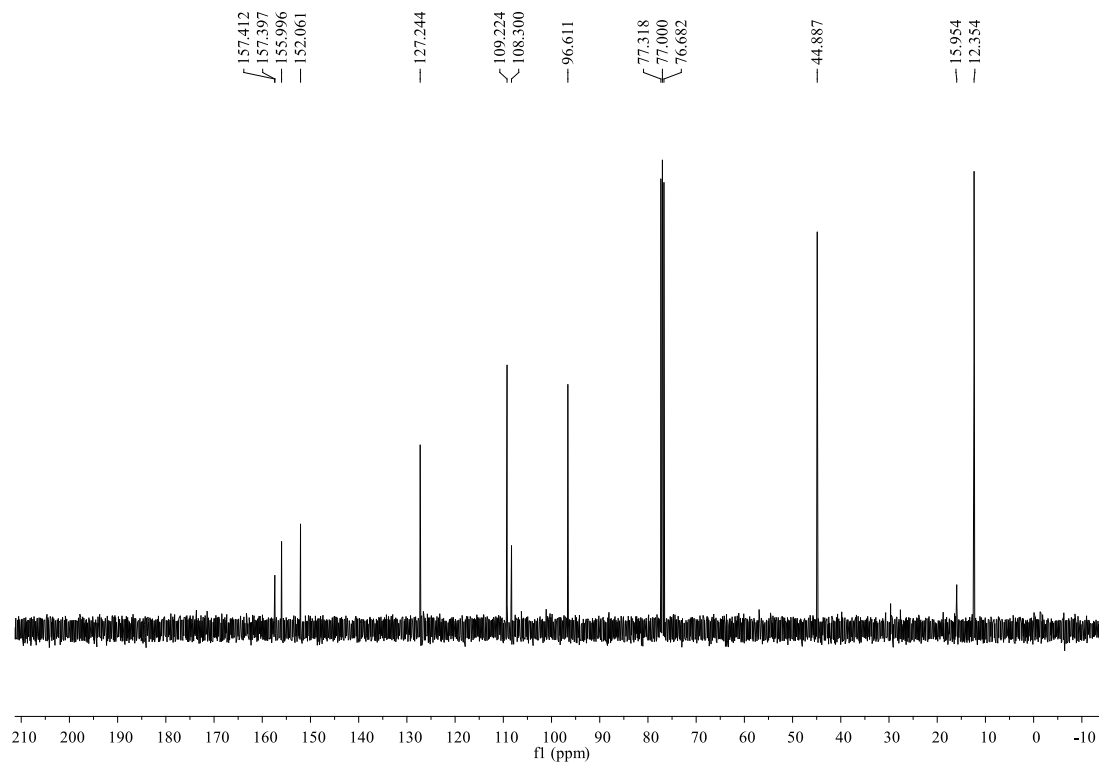

Ethyl 2-(1,3-dimethyl-2,4-dioxo-1,2,3,4-tetrahydropyrimidin-5-yl)-2,2-difluoroacetate (7j).

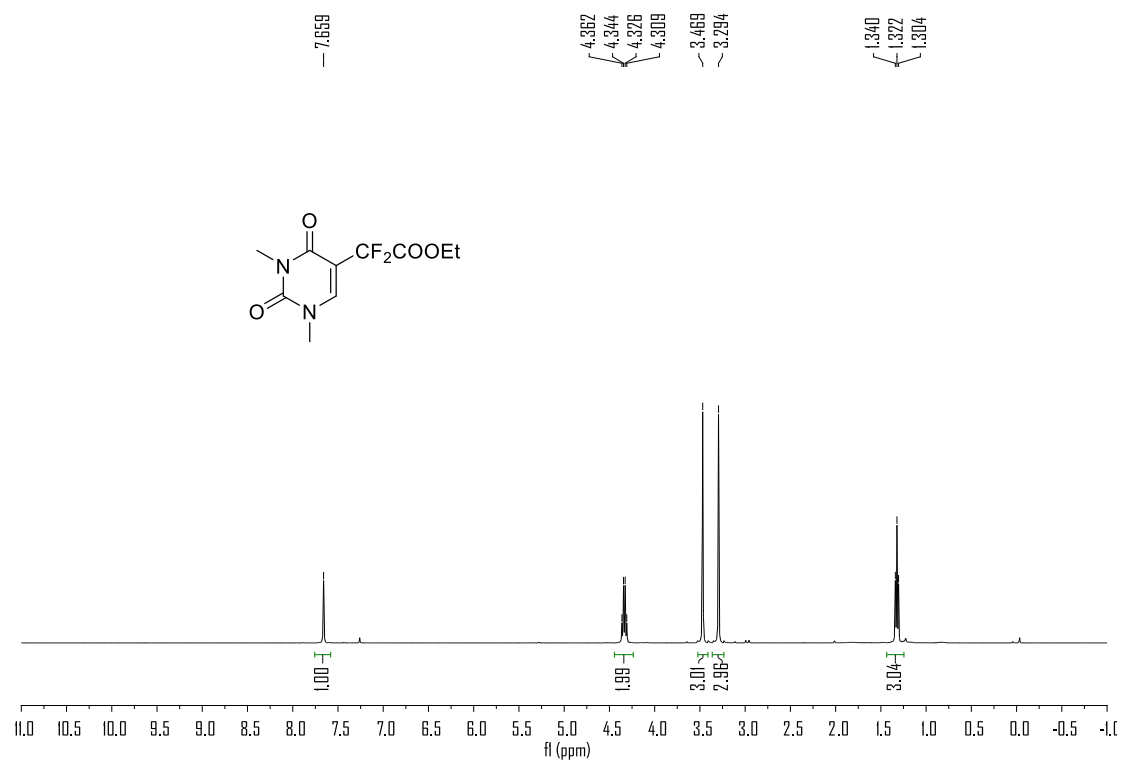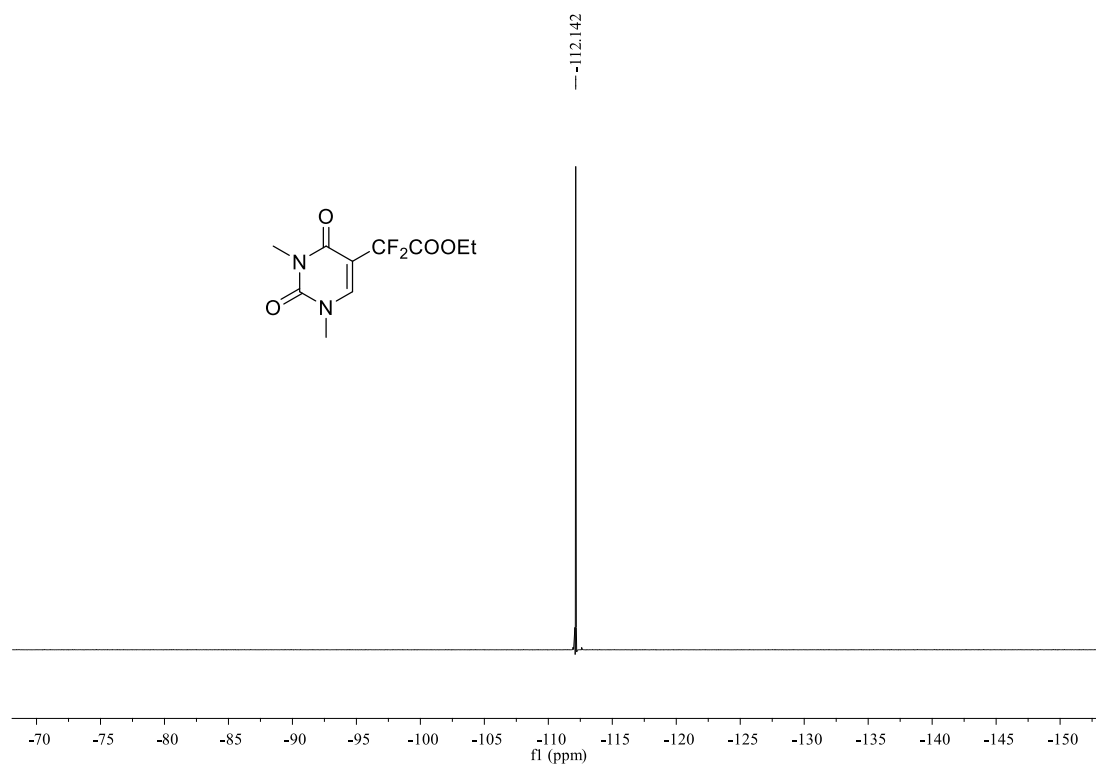

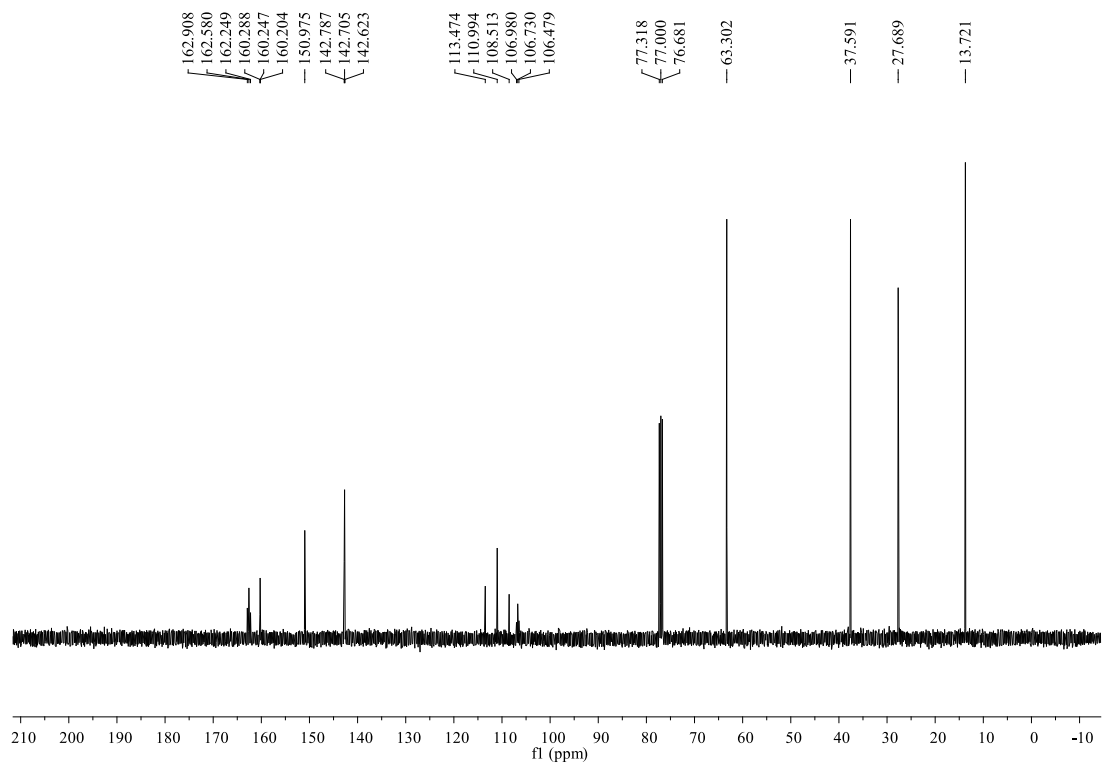

**1,3-Dimethyl-5-(perfluorobutyl)pyrimidine-2,4(1H,3H)-dione (7k).**

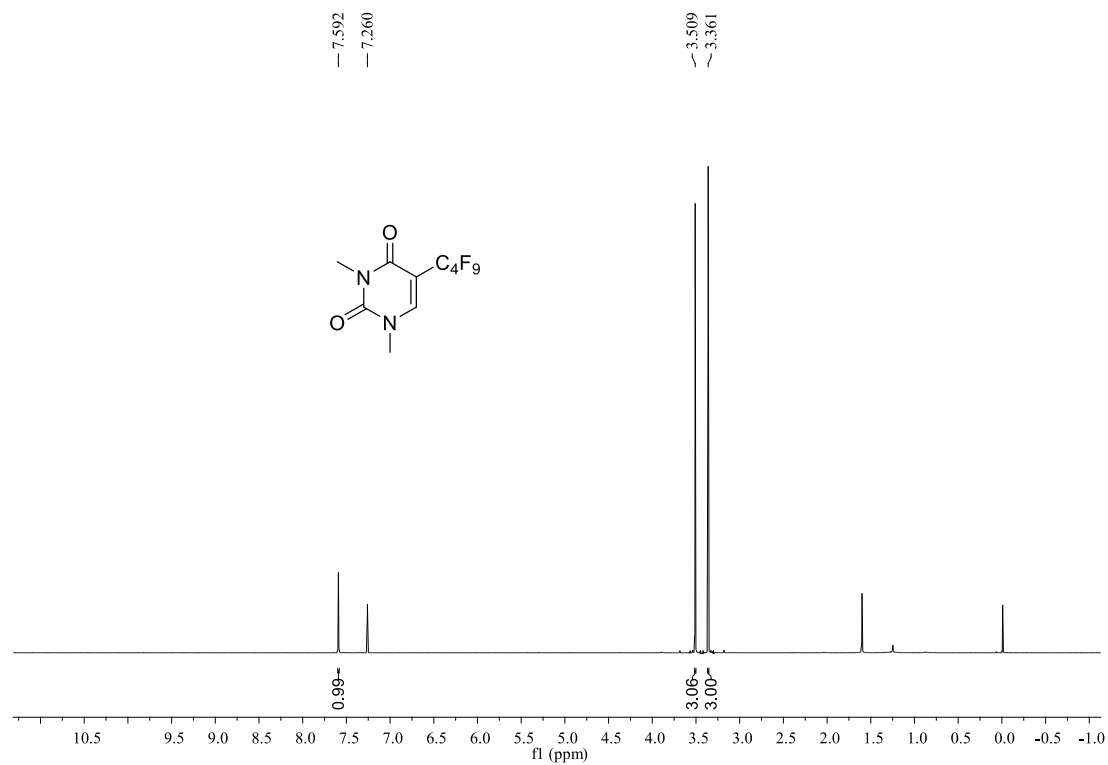

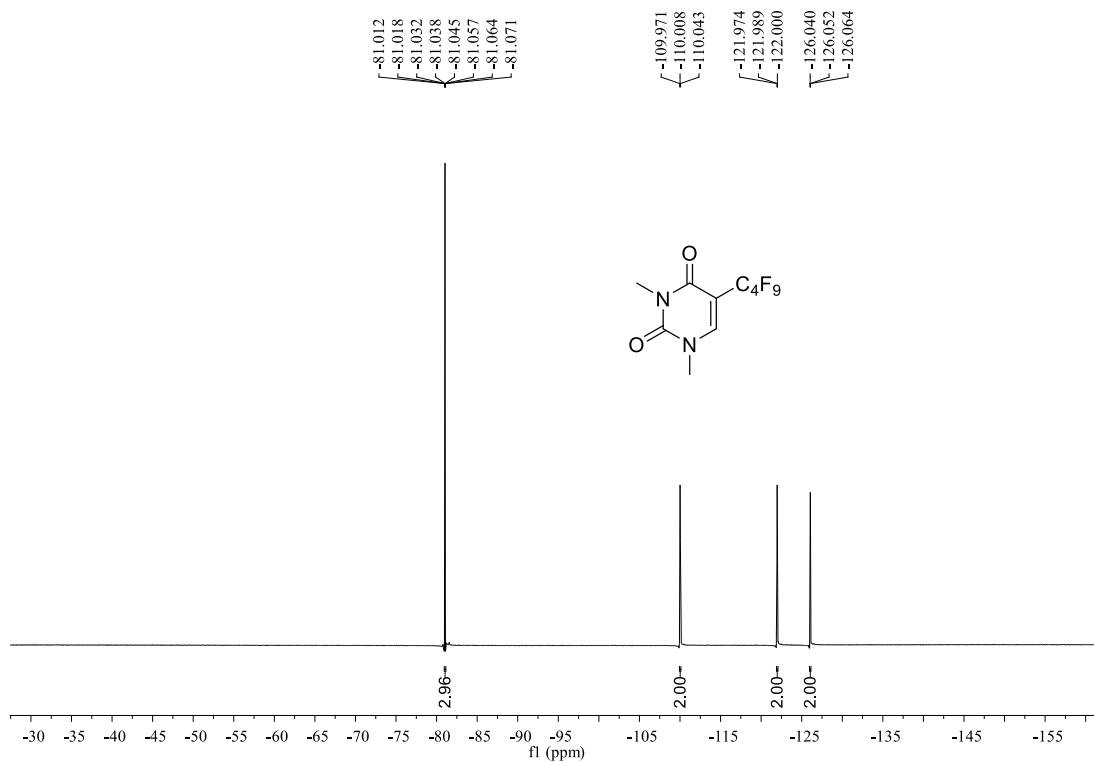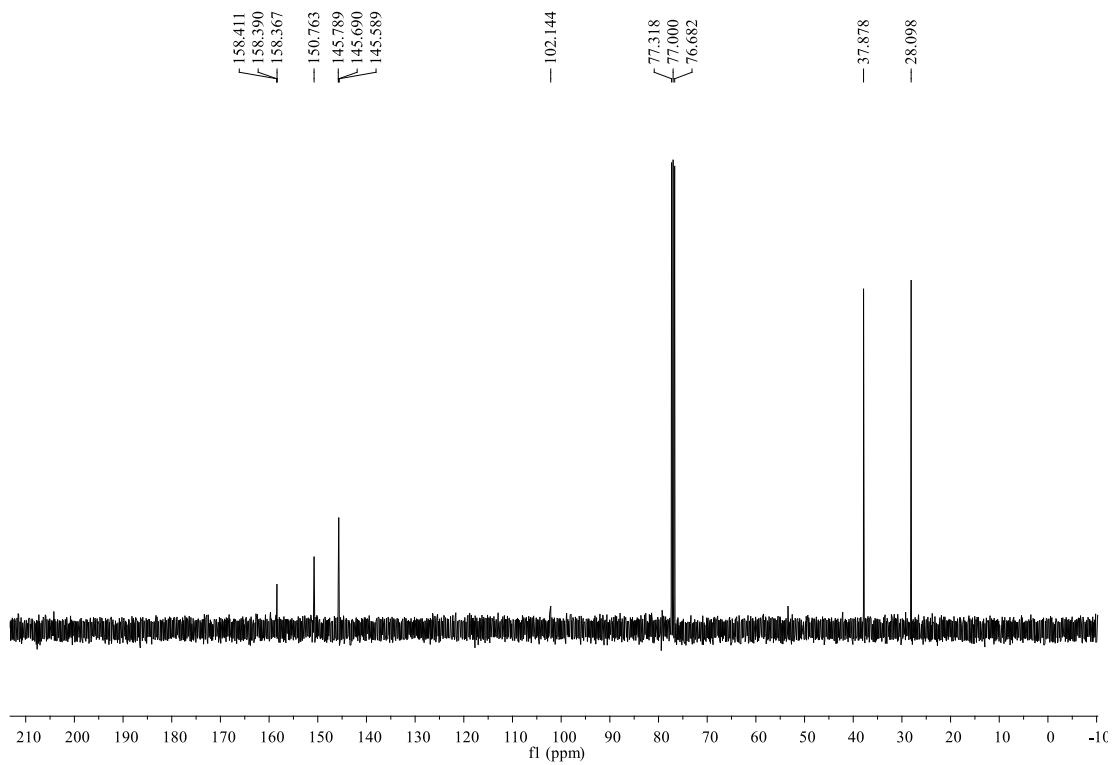

**1-Methyl-3-(perfluorobutyl)quinolin-4(1H)-one (7l).**

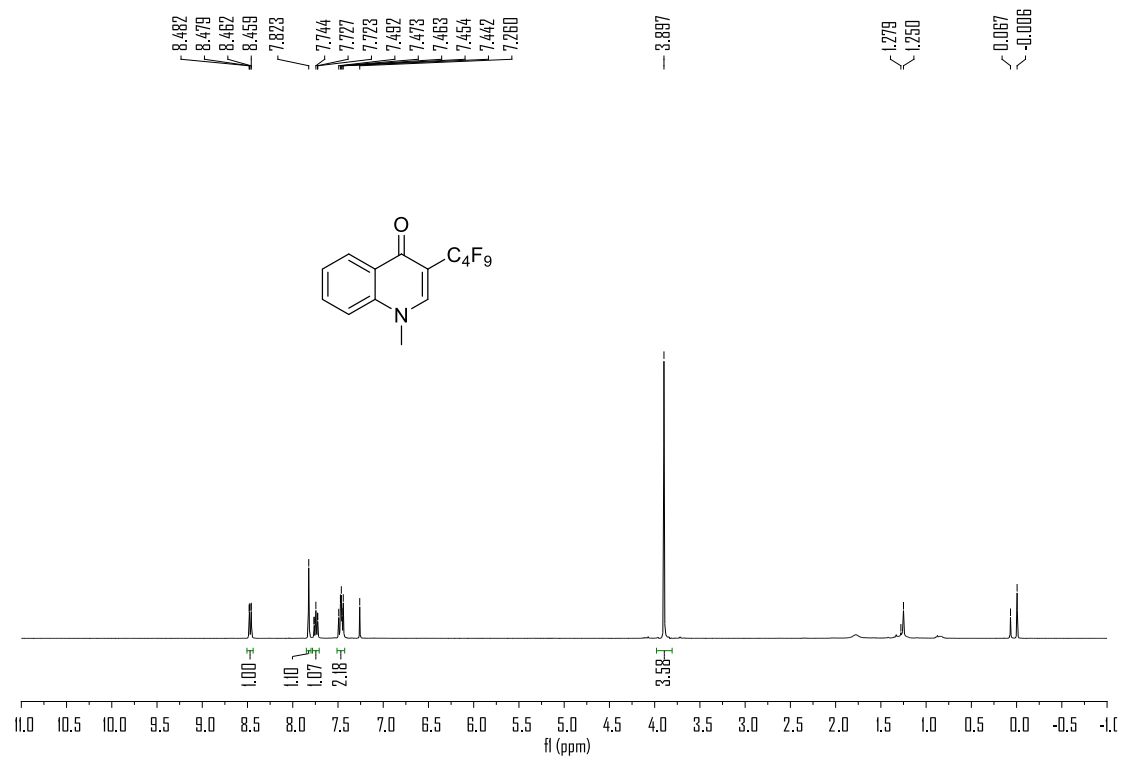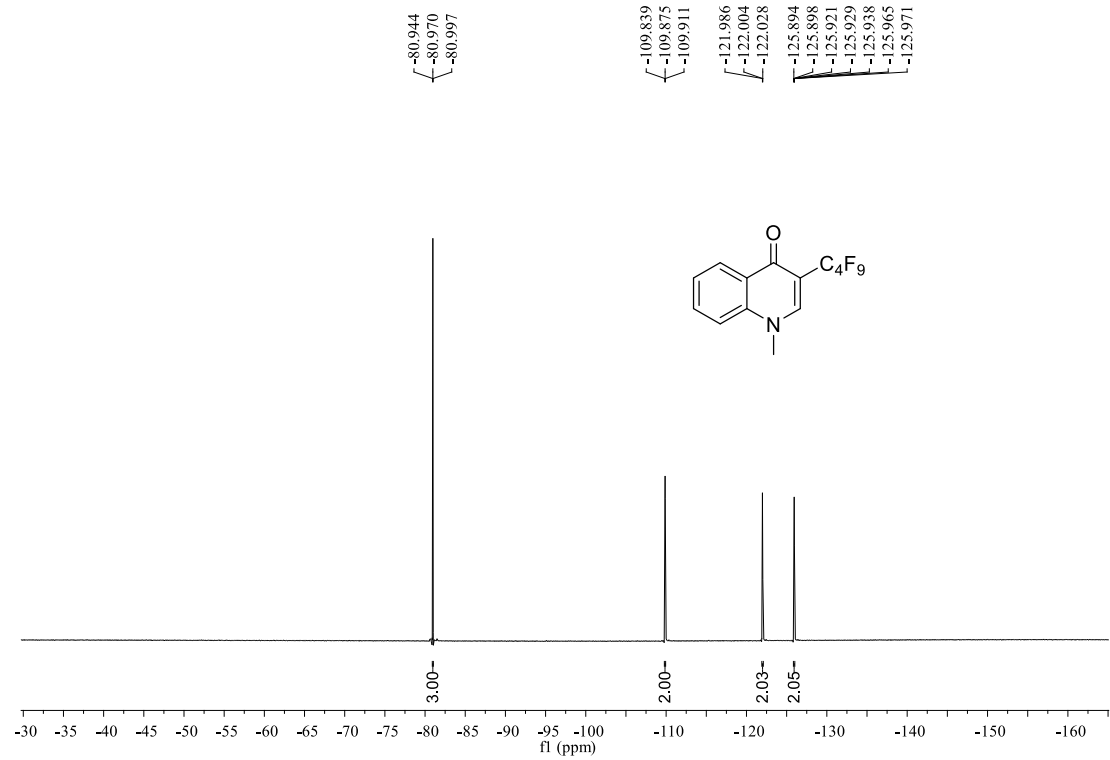



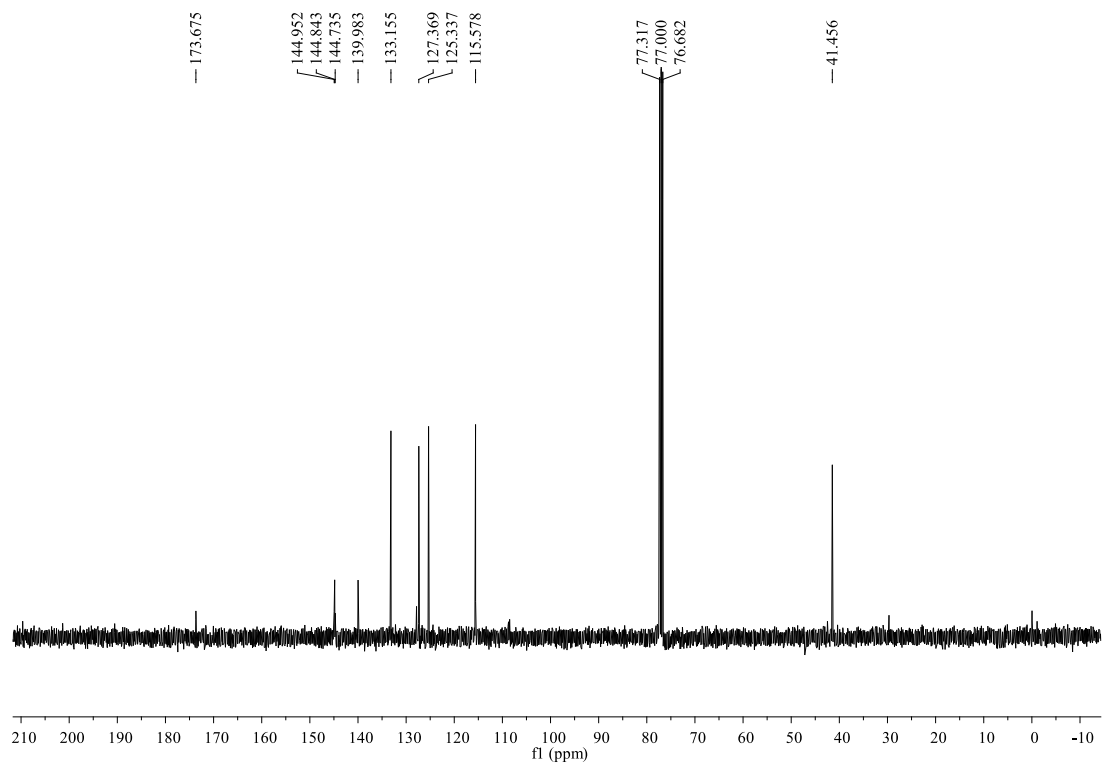

**Butyl 5-(2-ethoxy-1,1-difluoro-2-oxoethyl)-2,2-dimethyl-4-oxo-3,4-dihydro-2H-pyran-6-carboxylate (7o).**

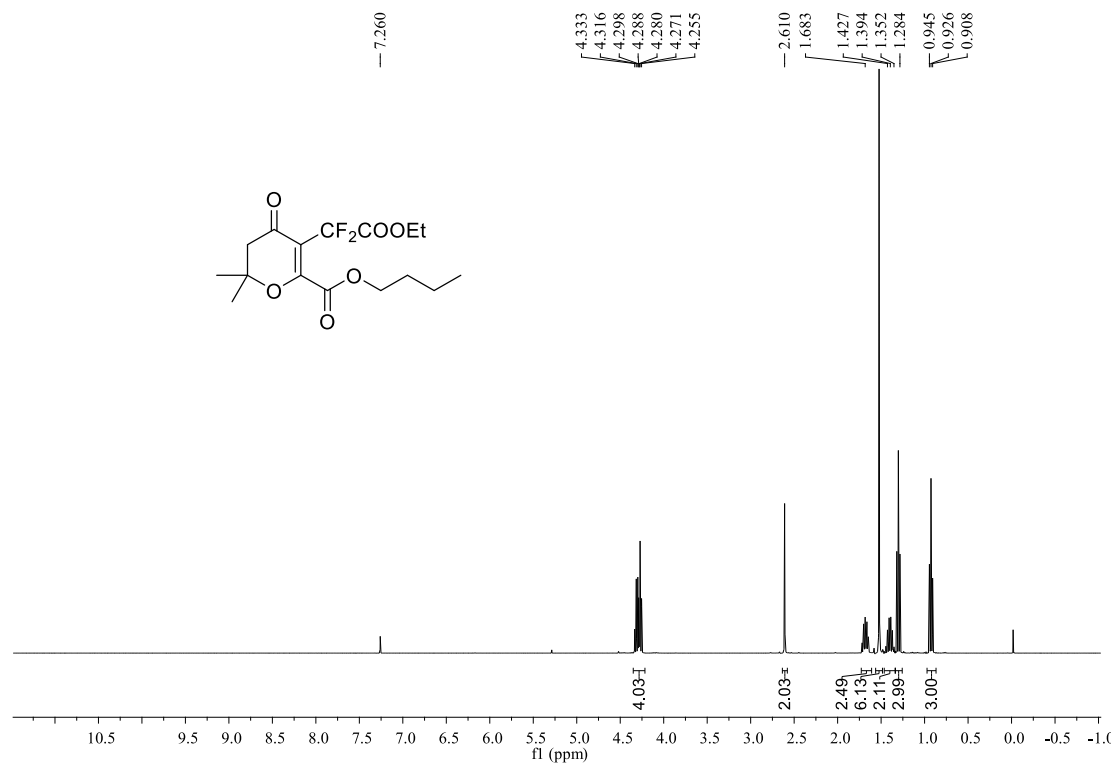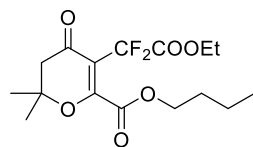

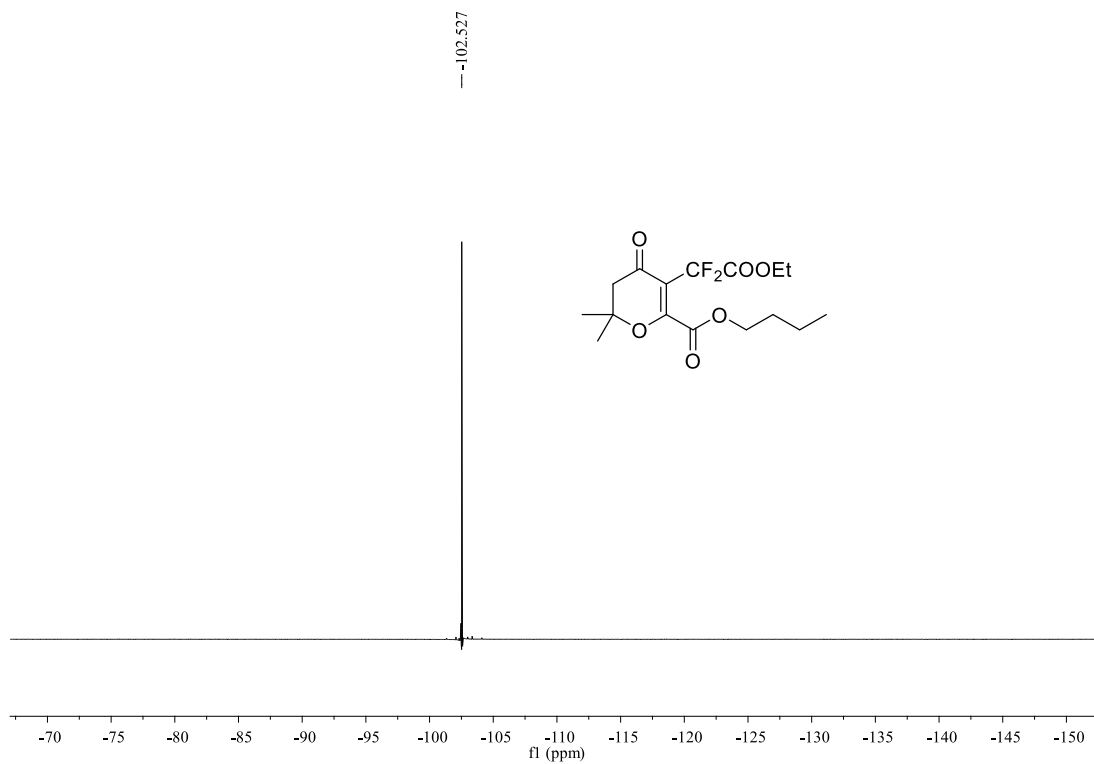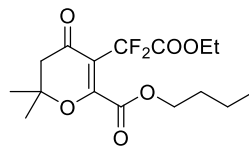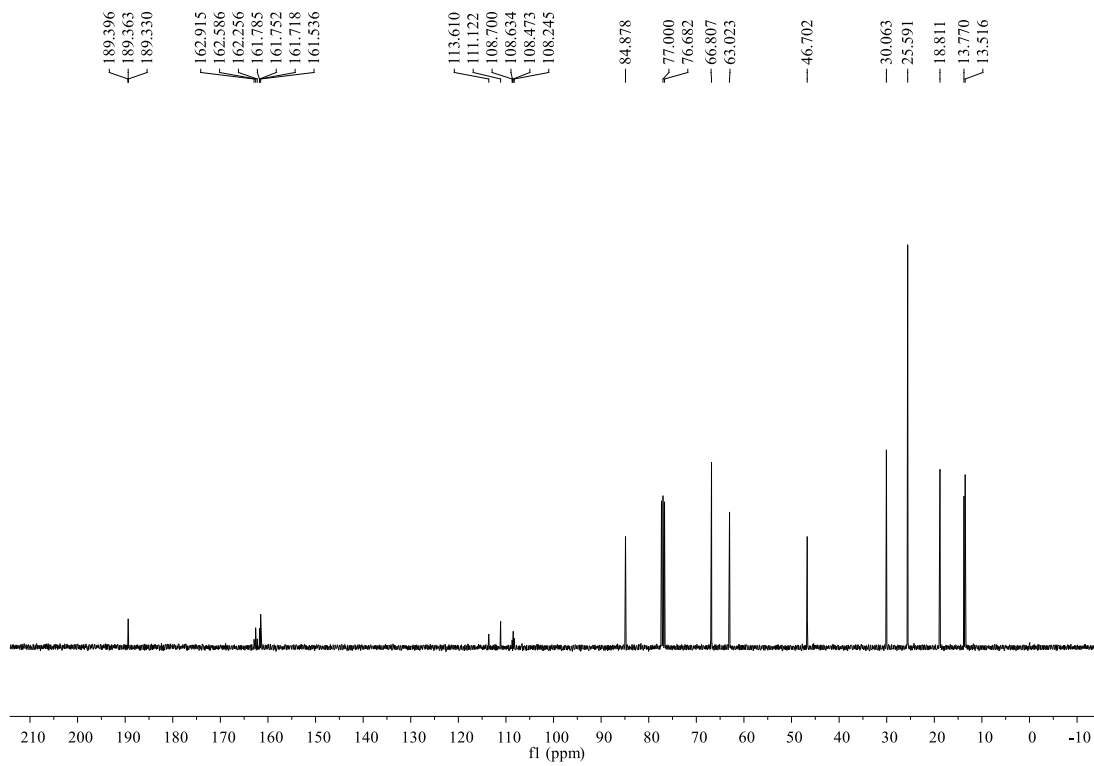

Supplement: c9cc09517a1.pdf [file c9cc09517a1.pdf]
